# Supplementary material
Source: PubMed Central journal article supplement (PMC7796995)
Supplement: NIHMS1640456-supplement-Supplementary_Data_1.pdf [file NIHMS1640456-supplement-Supplementary_Data_1.pdf]

# Supplementary Data 1

## Multi-peak loci overview

J. White, K. Indencleef et al.

### Contents

|                                           |    |                                           |    |
|-------------------------------------------|----|-------------------------------------------|----|
| Multi-peak locus 1: rs76244841 . . . . .  | 3  | Multi-peak locus 11: rs6555969 . . . . .  | 26 |
| Multi-peak locus 1: rs1572037 . . . . .   | 4  | Multi-peak locus 11: rs17073930 . . . . . | 27 |
| Multi-peak locus 2: rs7513680 . . . . .   | 5  | Multi-peak locus 12: rs2245221 . . . . .  | 28 |
| Multi-peak locus 2: rs12027501 . . . . .  | 6  | Multi-peak locus 12: rs11337200 . . . . . | 29 |
| Multi-peak locus 2: rs3936018 . . . . .   | 7  | Multi-peak locus 13: rs7843236 . . . . .  | 30 |
| Multi-peak locus 2: rs17023457 . . . . .  | 8  | Multi-peak locus 13: rs2581548 . . . . .  | 31 |
| Multi-peak locus 3: rs577676 . . . . .    | 9  | Multi-peak locus 14: rs242983 . . . . .   | 32 |
| Multi-peak locus 3: rs10919462 . . . . .  | 10 | Multi-peak locus 14: rs34988394 . . . . . | 33 |
| Multi-peak locus 4: rs6715010 . . . . .   | 11 | Multi-peak locus 15: rs7121535 . . . . .  | 34 |
| Multi-peak locus 4: rs79037251 . . . . .  | 12 | Multi-peak locus 15: rs10838269 . . . . . | 35 |
| Multi-peak locus 4: rs1427539 . . . . .   | 13 | Multi-peak locus 16: rs60493340 . . . . . | 36 |
| Multi-peak locus 5: rs6740960 . . . . .   | 14 | Multi-peak locus 16: rs11175967 . . . . . | 37 |
| Multi-peak locus 5: rs10189338 . . . . .  | 15 | Multi-peak locus 17: rs2695152 . . . . .  | 38 |
| Multi-peak locus 6: rs921119 . . . . .    | 16 | Multi-peak locus 17: rs10160931 . . . . . | 39 |
| Multi-peak locus 6: rs35395759 . . . . .  | 17 | Multi-peak locus 18: rs58687115 . . . . . | 40 |
| Multi-peak locus 7: rs11692600 . . . . .  | 18 | Multi-peak locus 18: rs4385969 . . . . .  | 41 |
| Multi-peak locus 7: rs332108 . . . . .    | 19 | Multi-peak locus 19: rs11609649 . . . . . | 42 |
| Multi-peak locus 8: rs970797 . . . . .    | 20 | Multi-peak locus 19: rs10779162 . . . . . | 43 |
| Multi-peak locus 8: rs10178696 . . . . .  | 21 | Multi-peak locus 20: rs11842203 . . . . . | 44 |
| Multi-peak locus 9: rs58022575 . . . . .  | 22 | Multi-peak locus 20: rs9524742 . . . . .  | 45 |
| Multi-peak locus 9: rs56081252 . . . . .  | 23 | Multi-peak locus 21: rs1542448 . . . . .  | 46 |
| Multi-peak locus 10: rs3910659 . . . . .  | 24 | Multi-peak locus 21: rs76810699 . . . . . | 47 |
| Multi-peak locus 10: rs13117653 . . . . . | 25 | Multi-peak locus 22: rs34430707 . . . . . | 48 |

---

|                                            |    |                                          |    |
|--------------------------------------------|----|------------------------------------------|----|
| Multi-peak locus 22: rs112087864 . . . . . | 49 | Multi-peak locus 24: rs6047635 . . . . . | 52 |
| Multi-peak locus 23: rs7218433 . . . . .   | 50 | Multi-peak locus 24: rs6047637 . . . . . | 53 |
| Multi-peak locus 23: rs227727 . . . . .    | 51 |                                          |    |



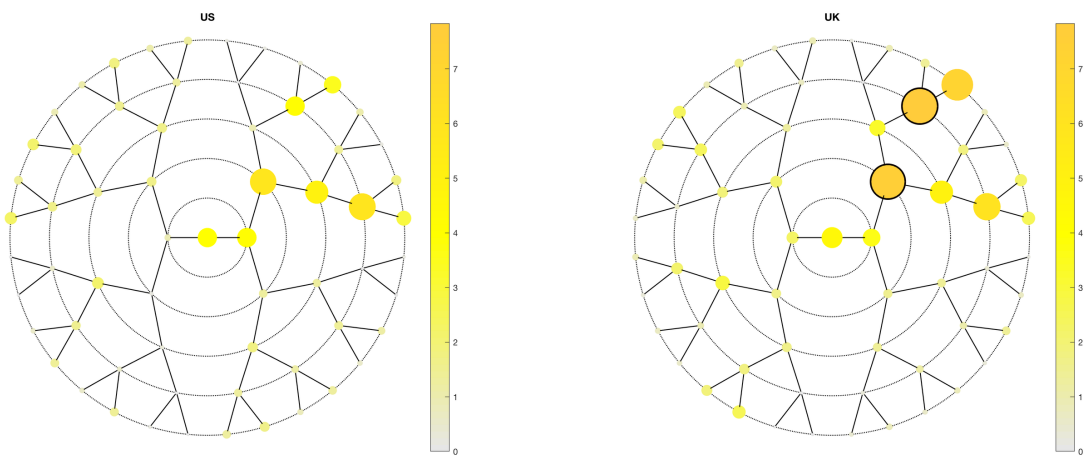

A

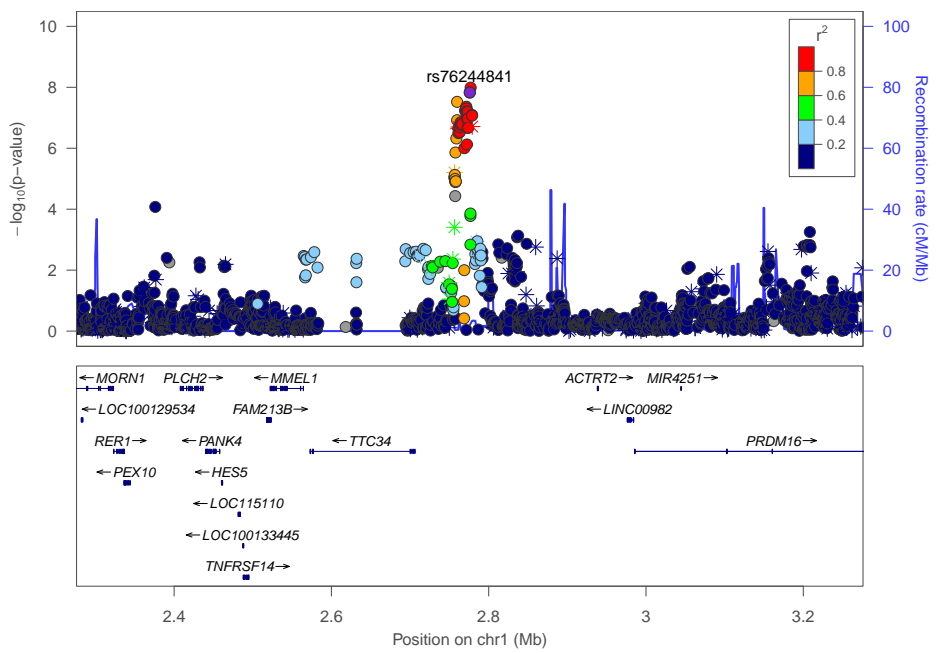

C

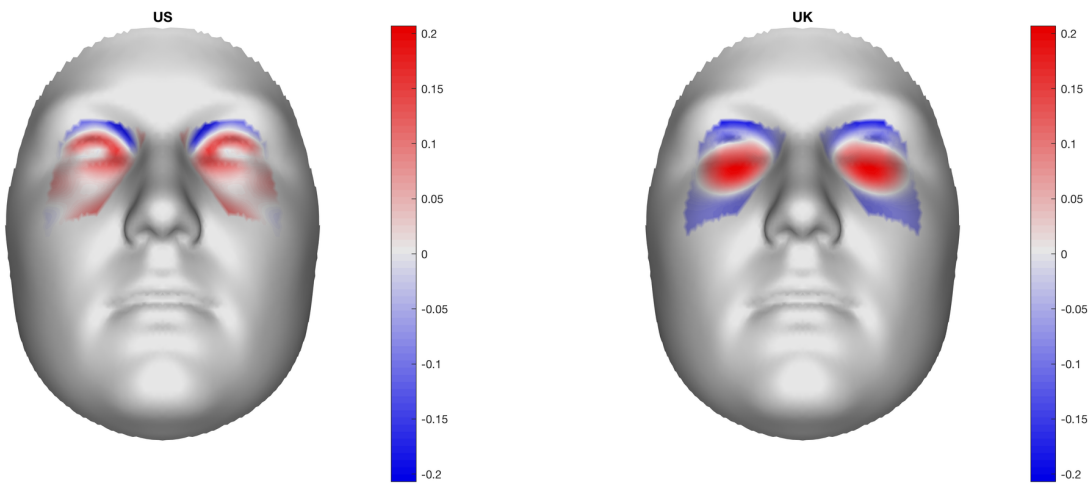

B

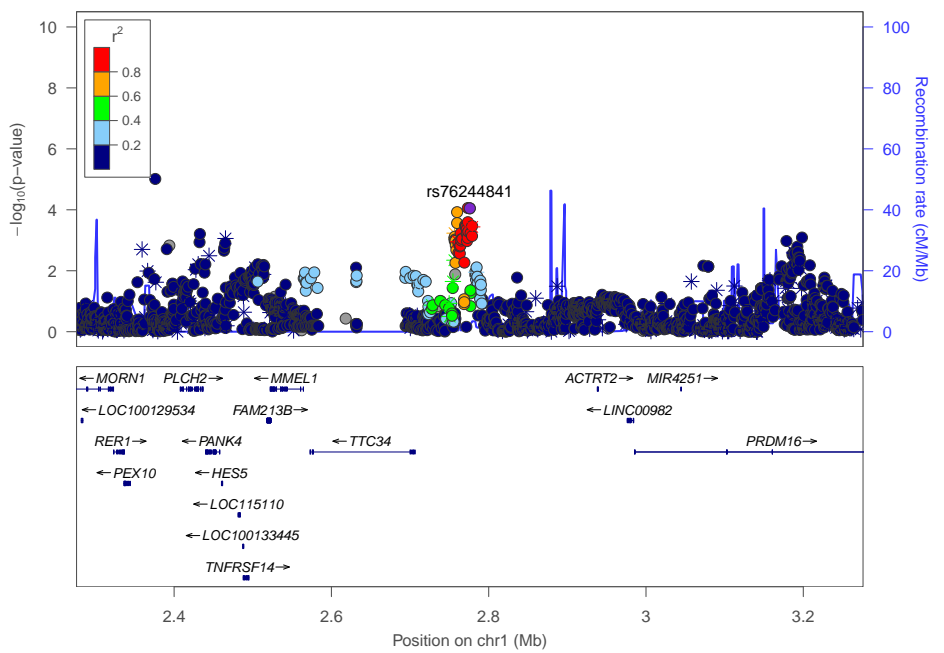

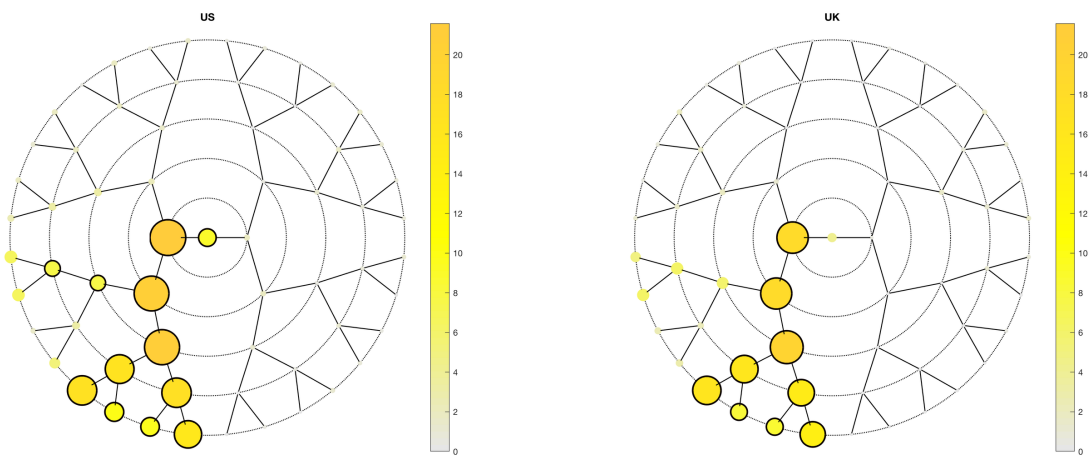

A

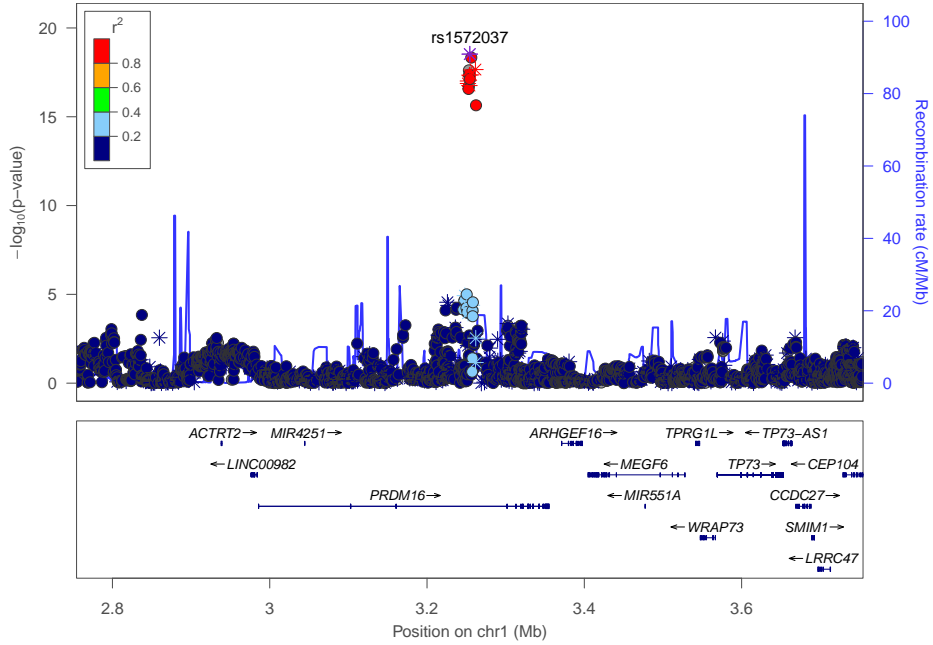

C

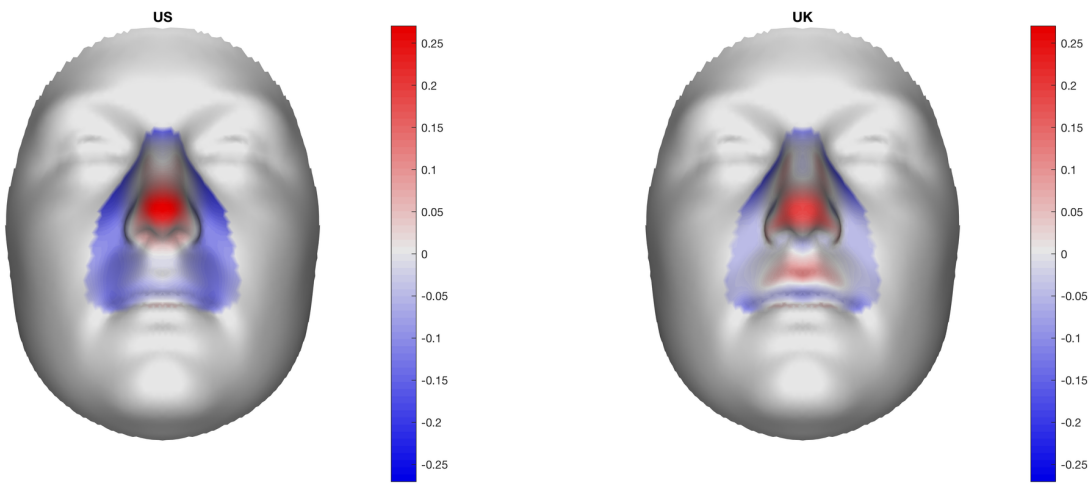

B

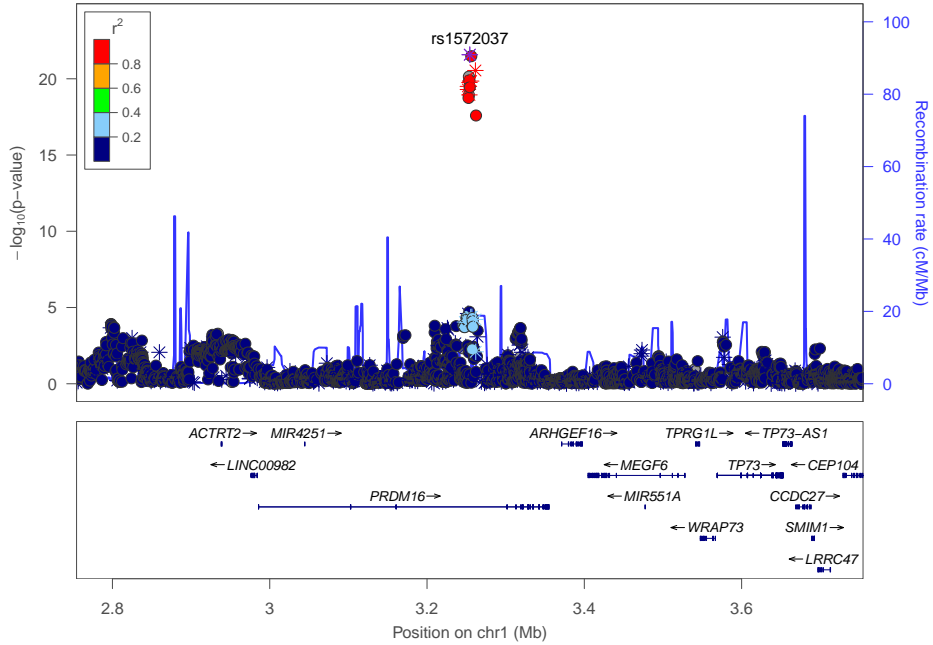

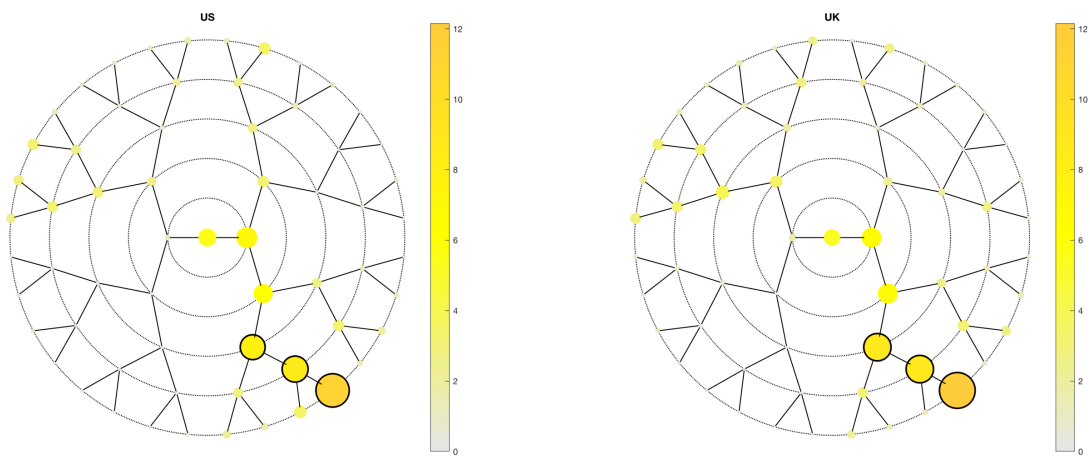

A

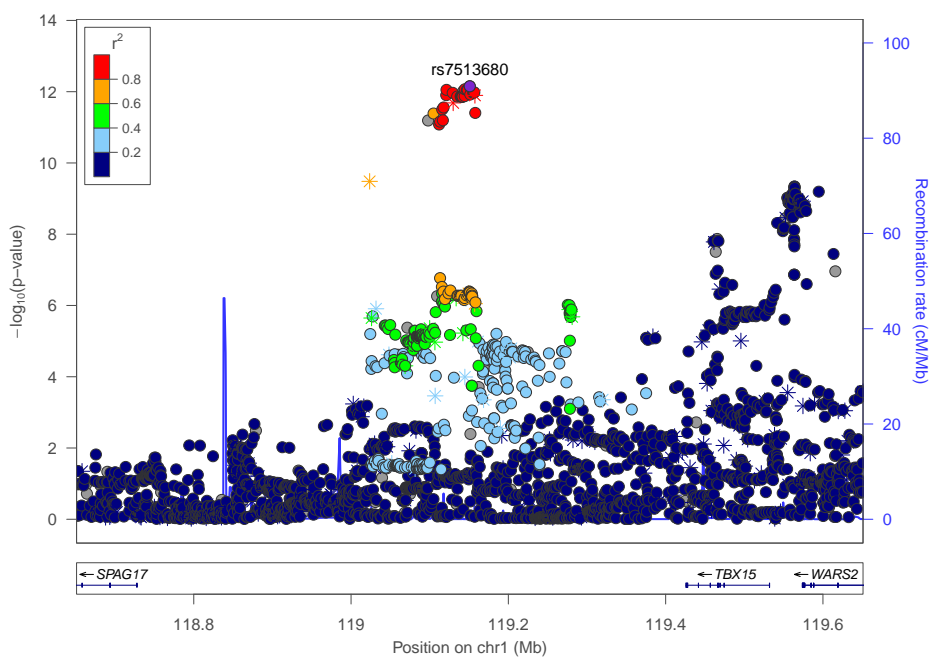

C

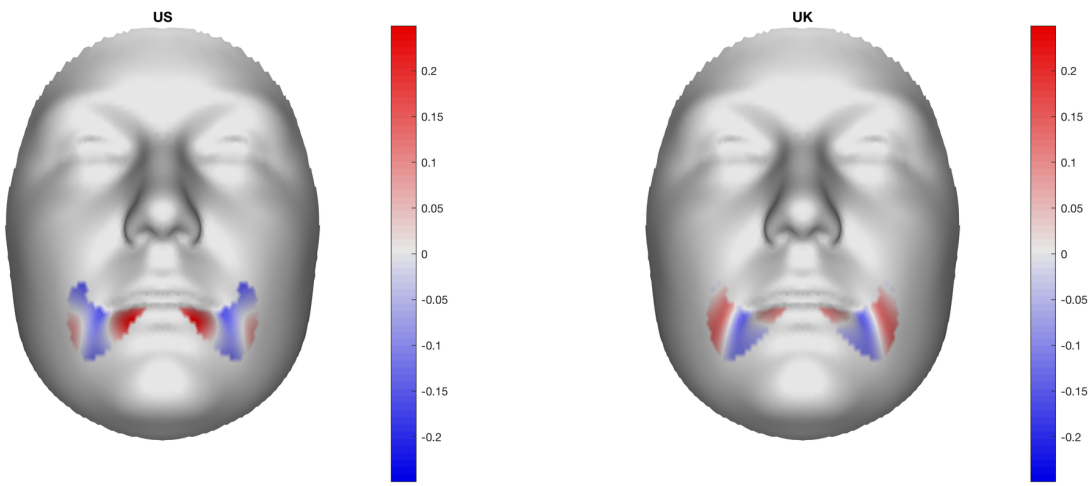

B

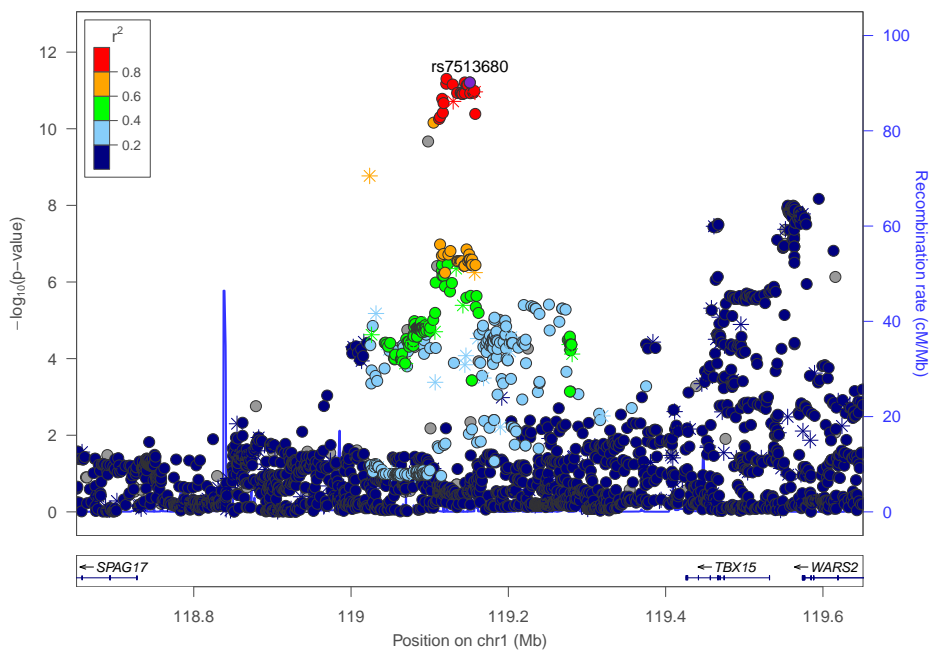

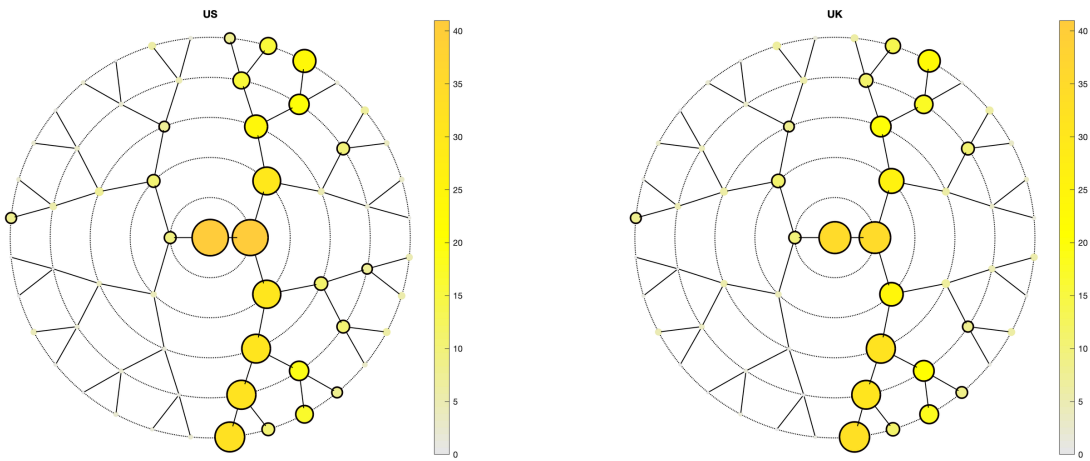

A

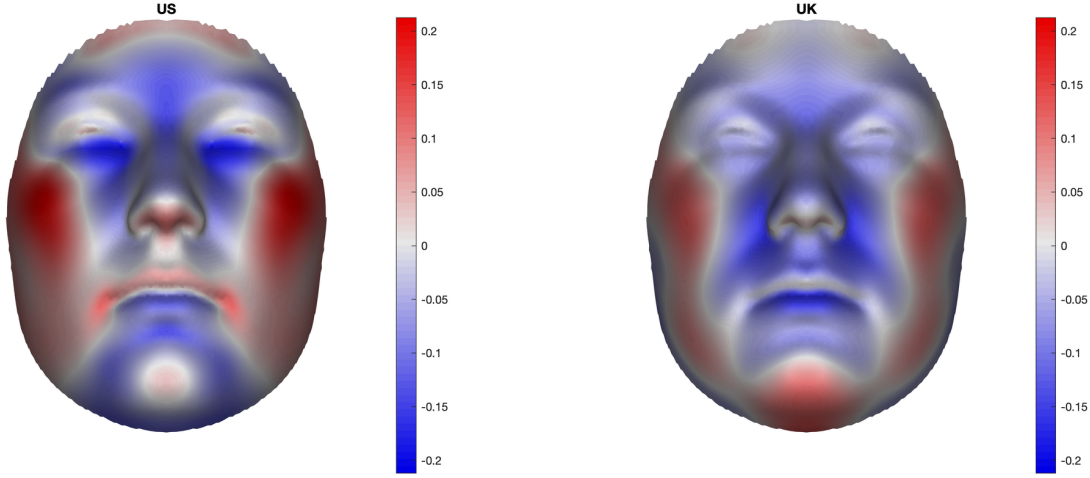

B

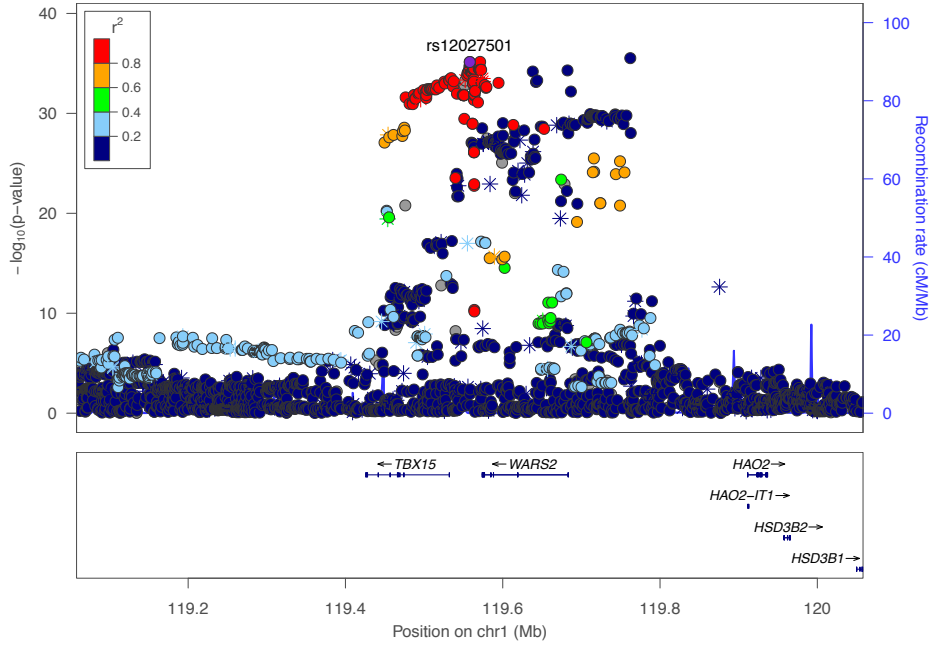

C

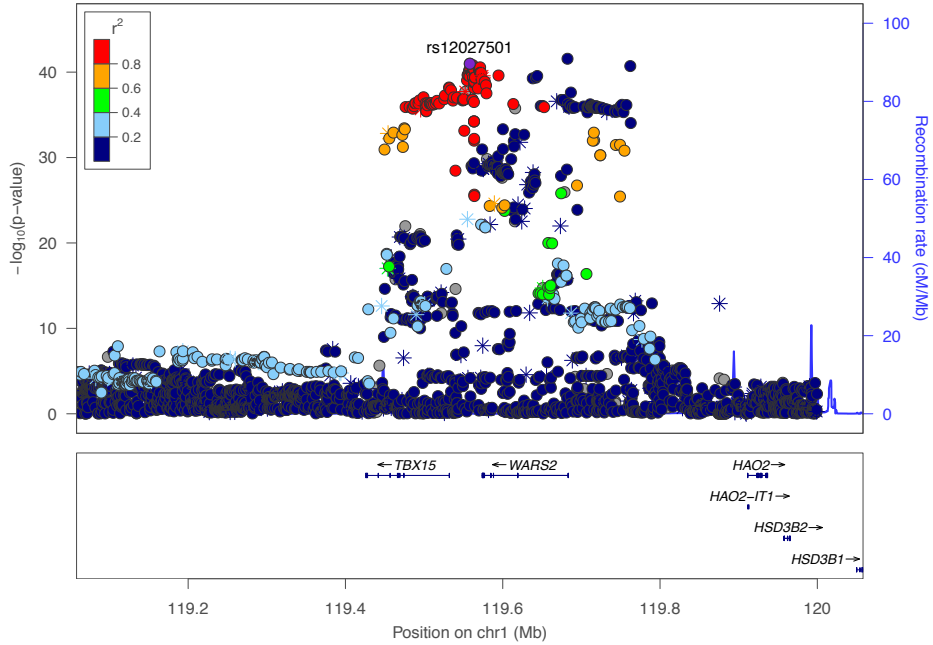

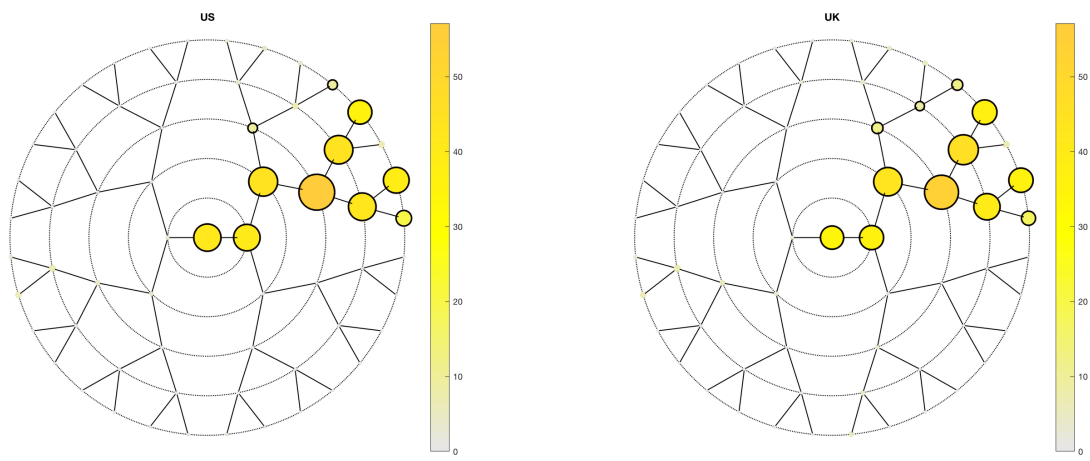

A

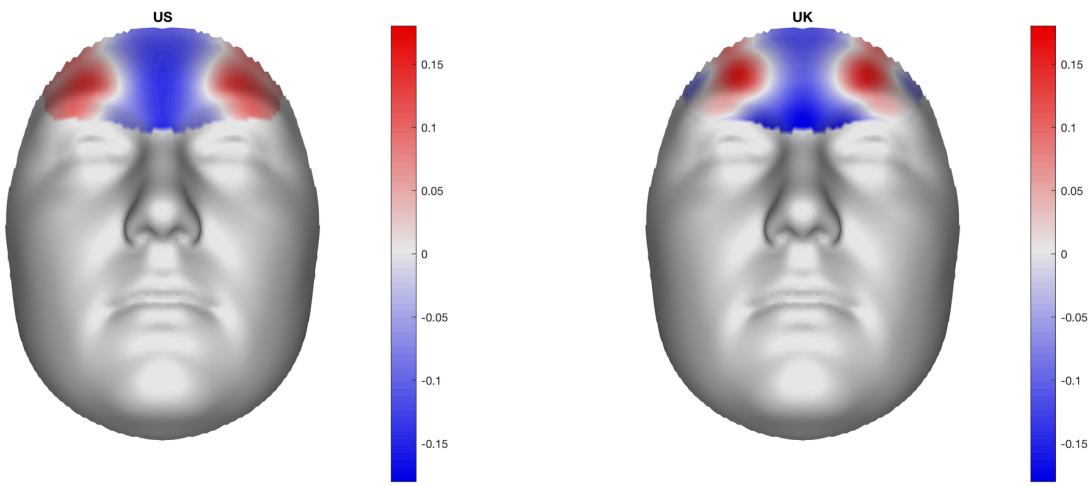

B

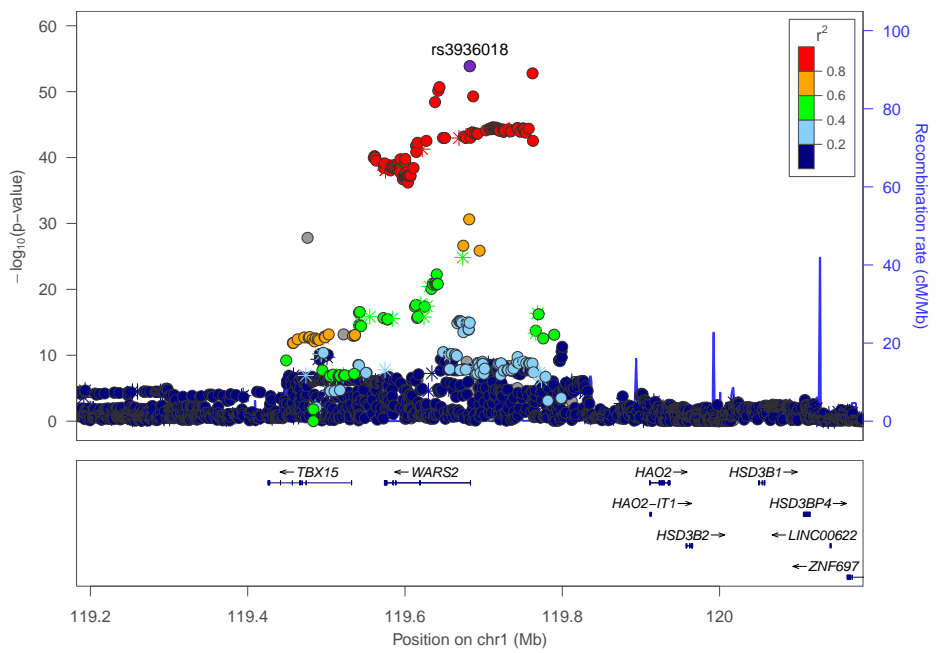

C

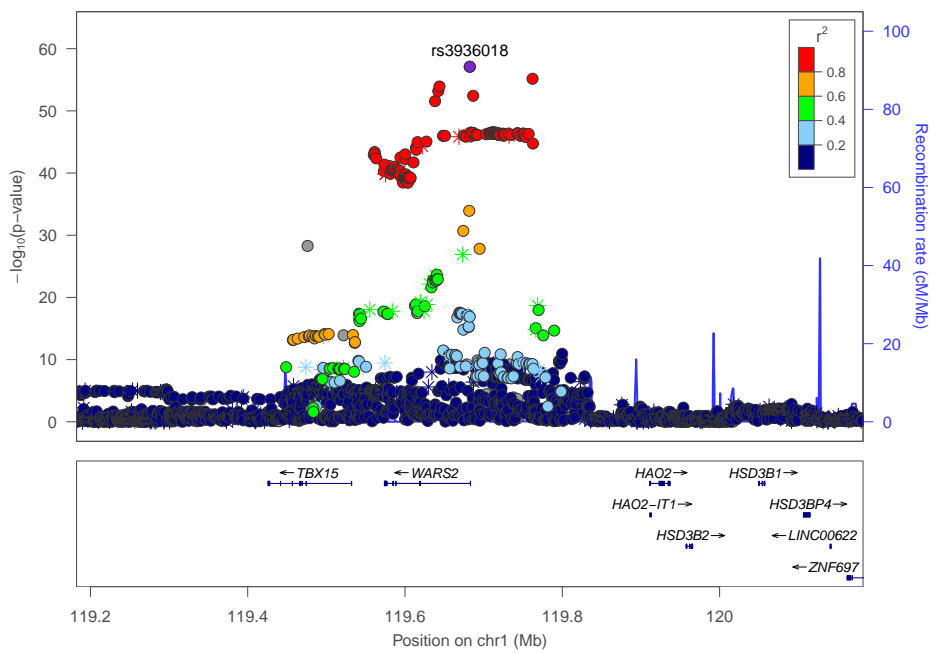



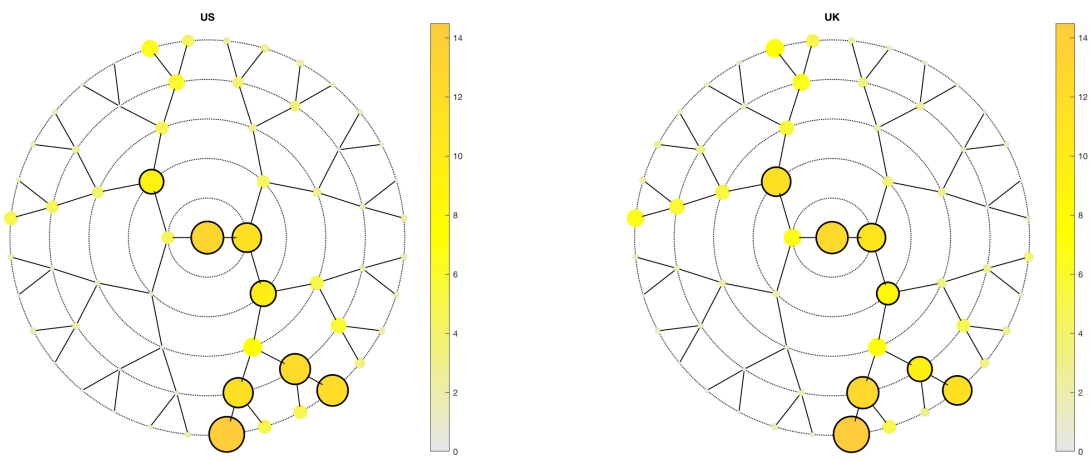

A

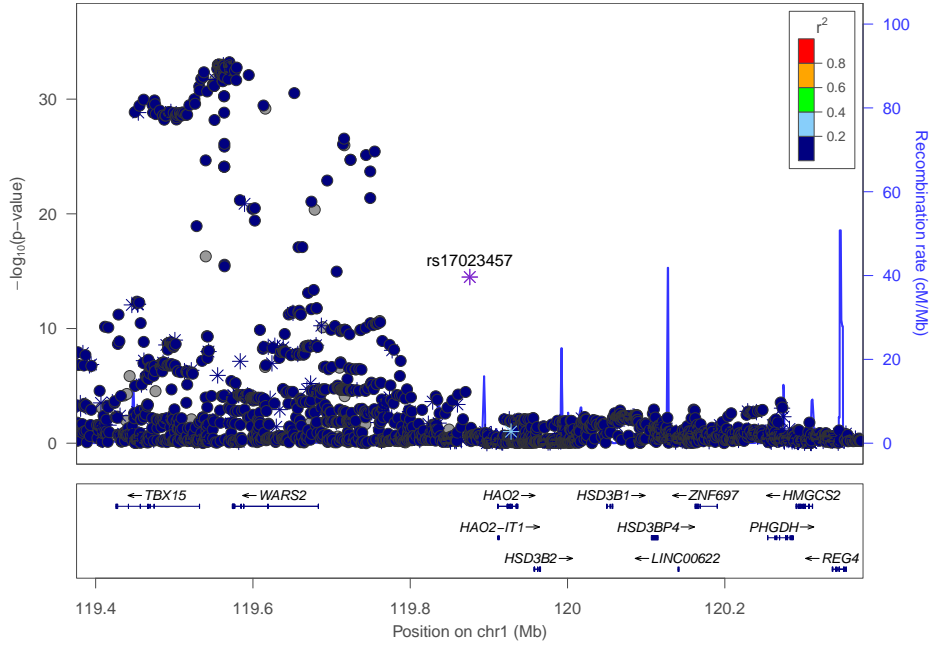

C

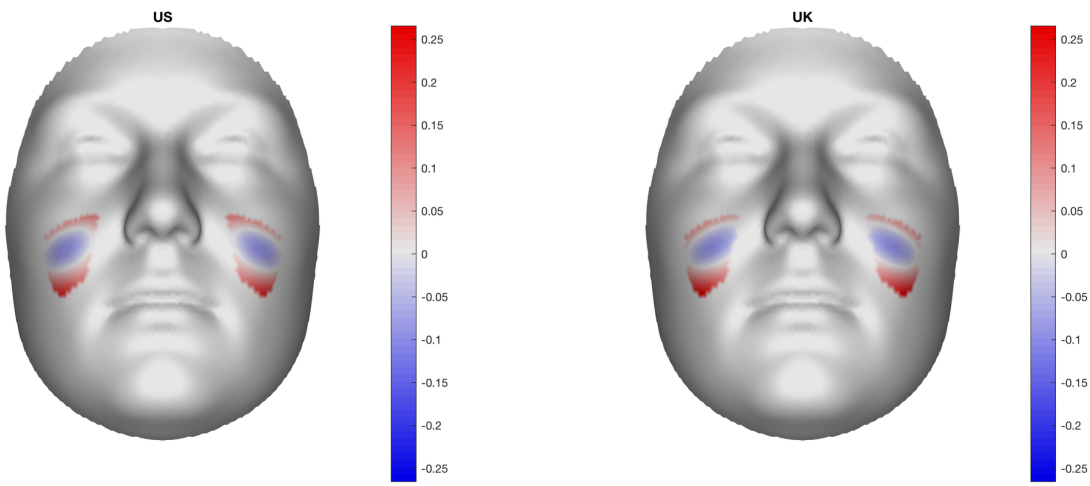

B

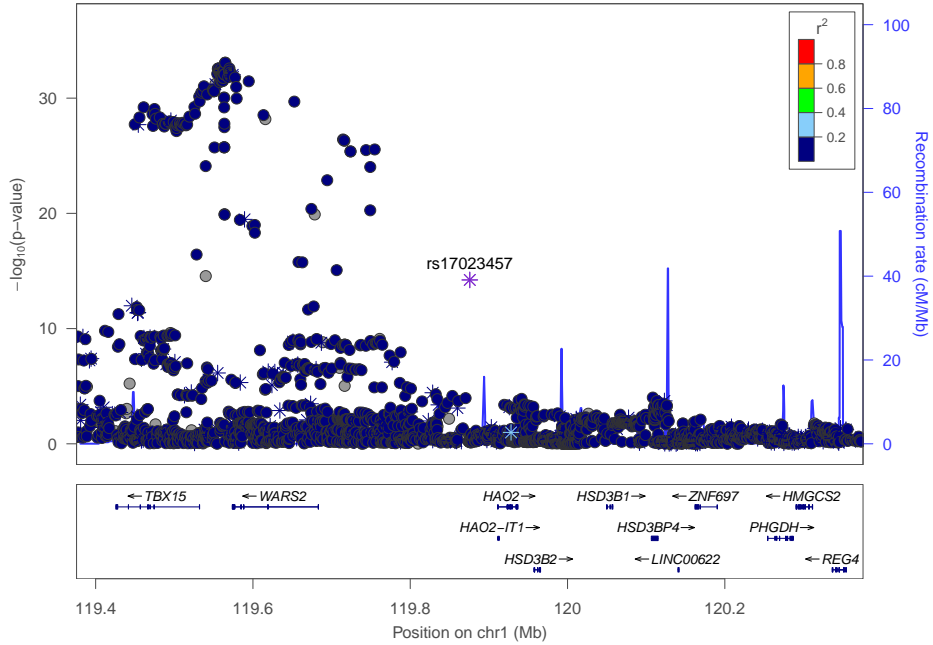

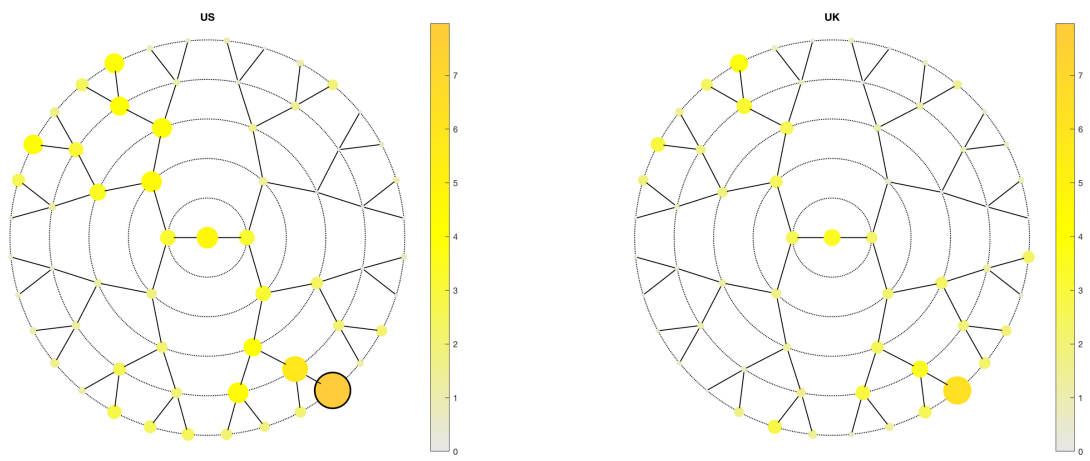

A

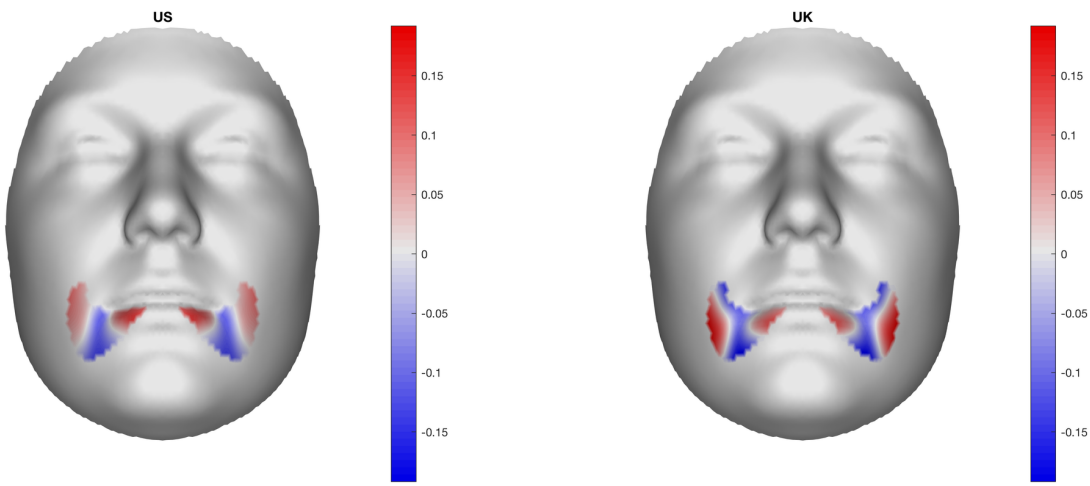

B

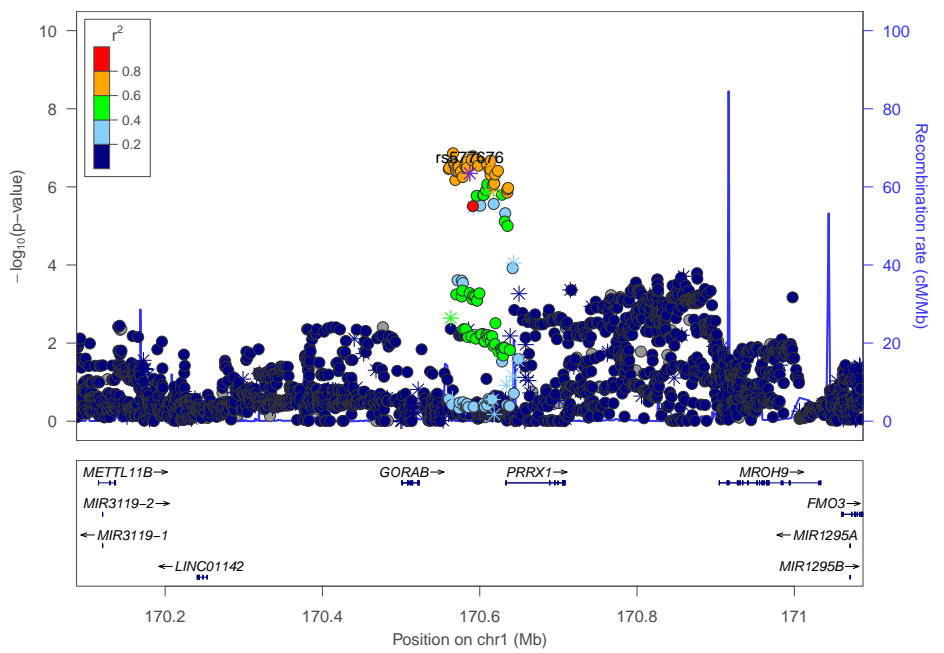

C

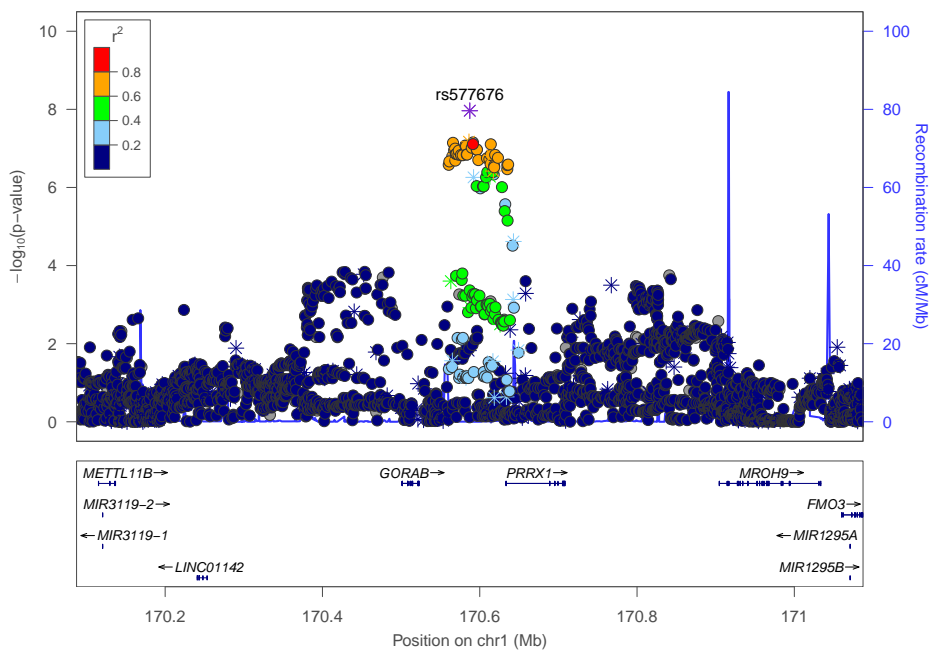

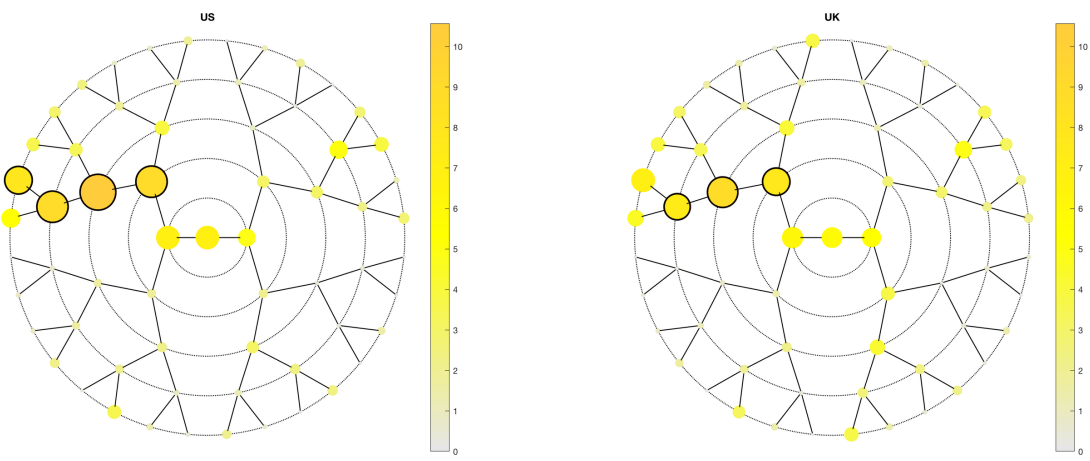

A

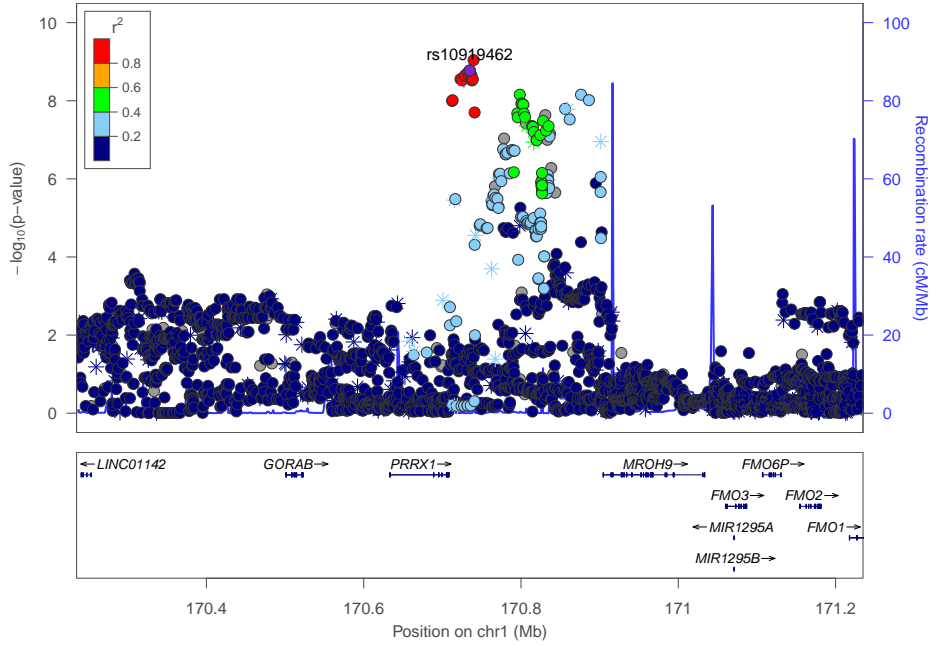

C

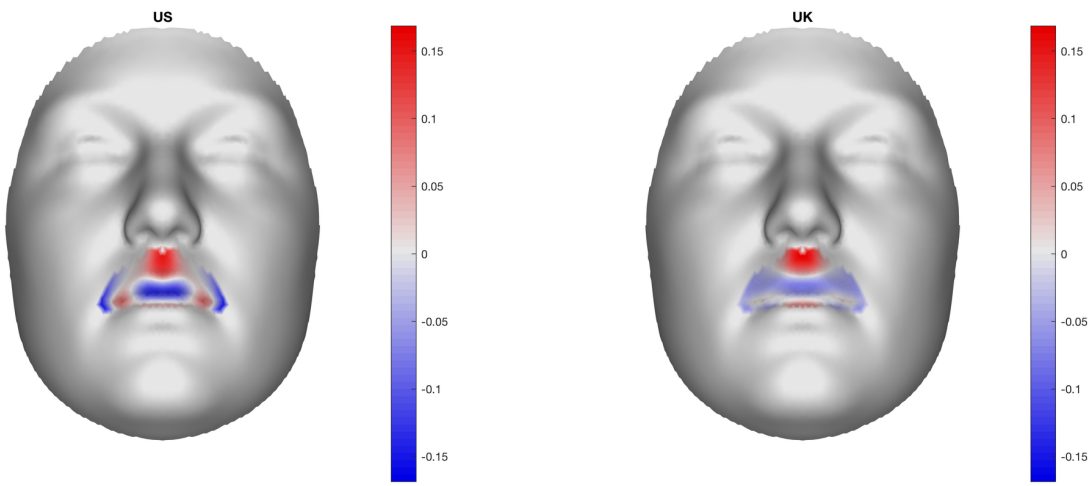

B

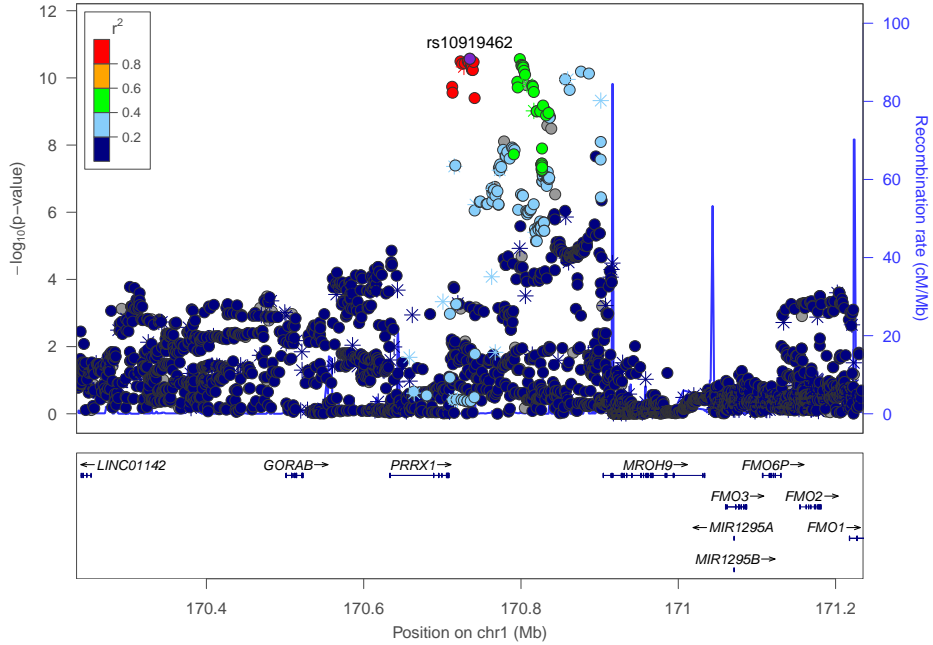



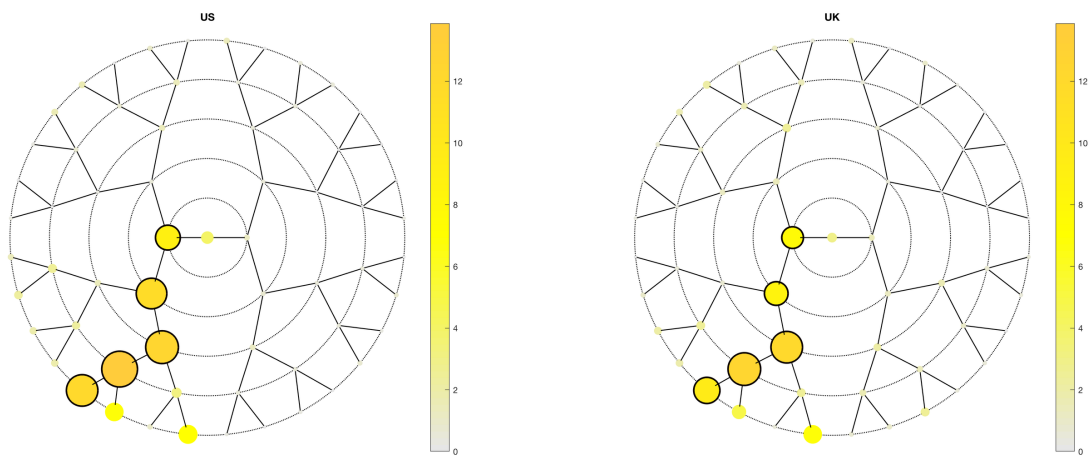

A

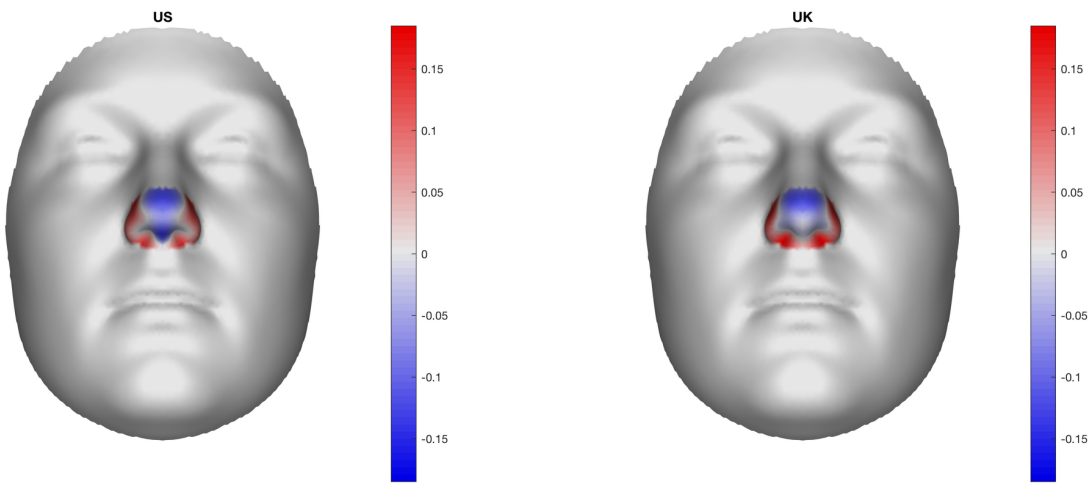

B

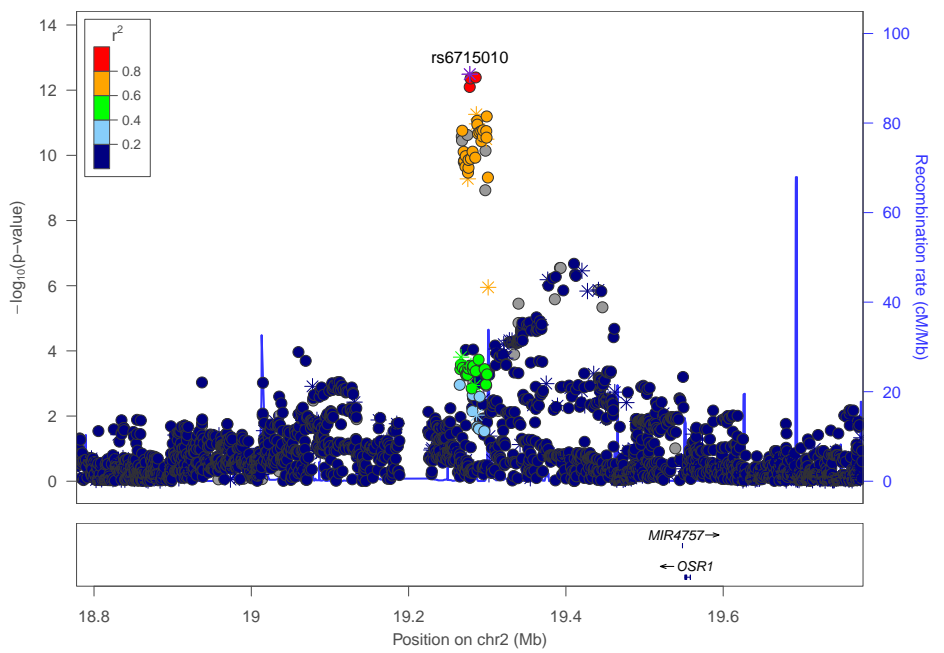

C

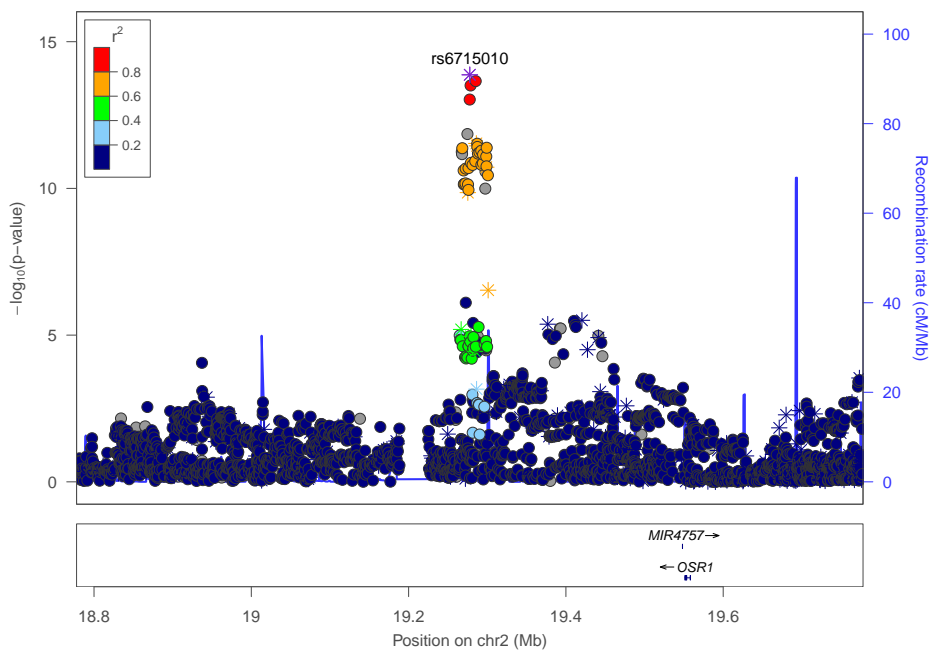

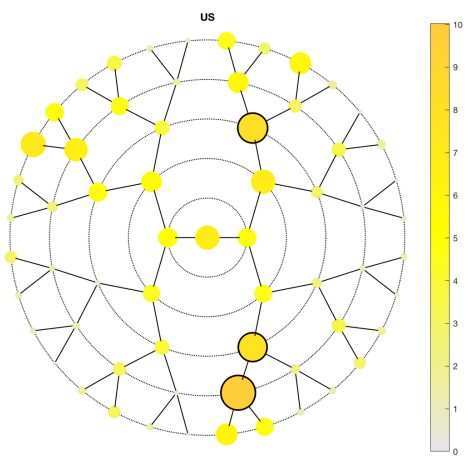

A

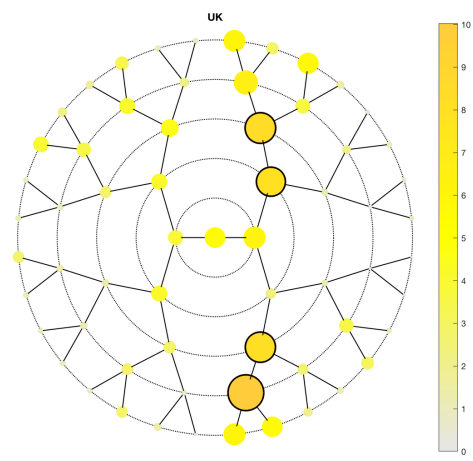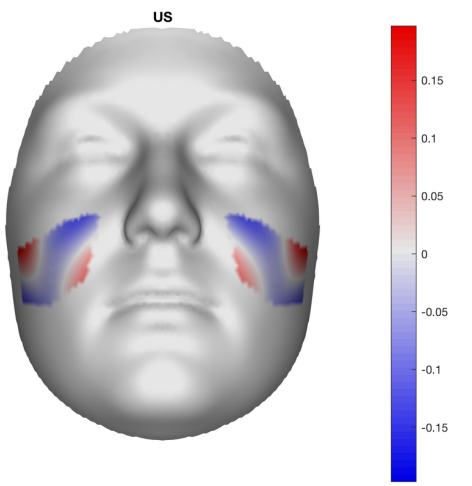

B

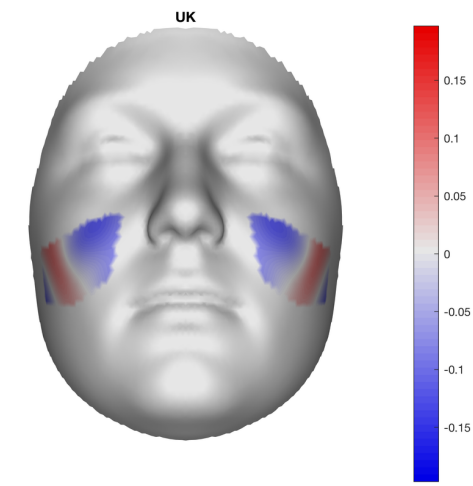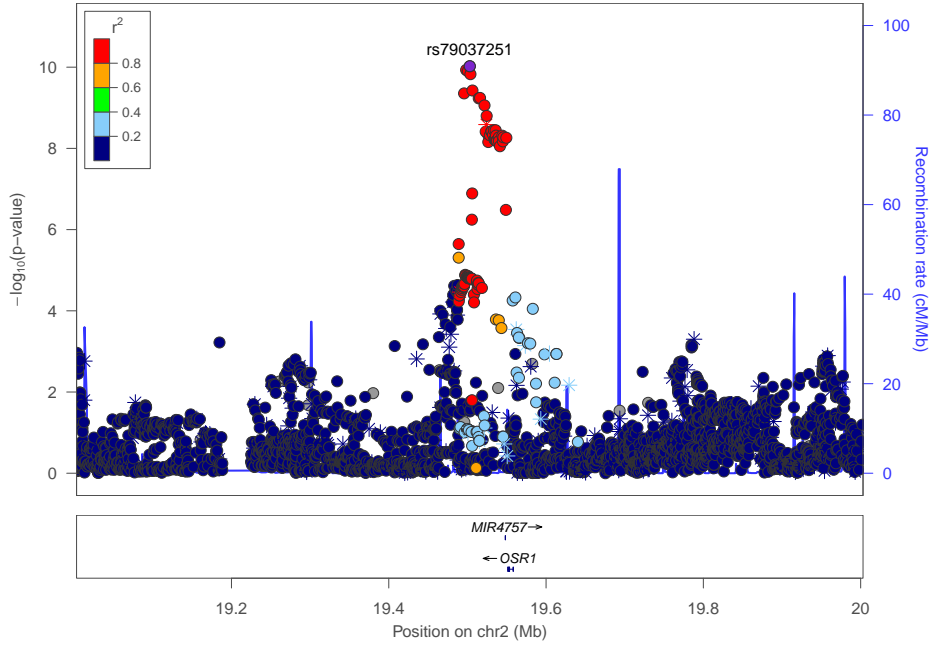

C

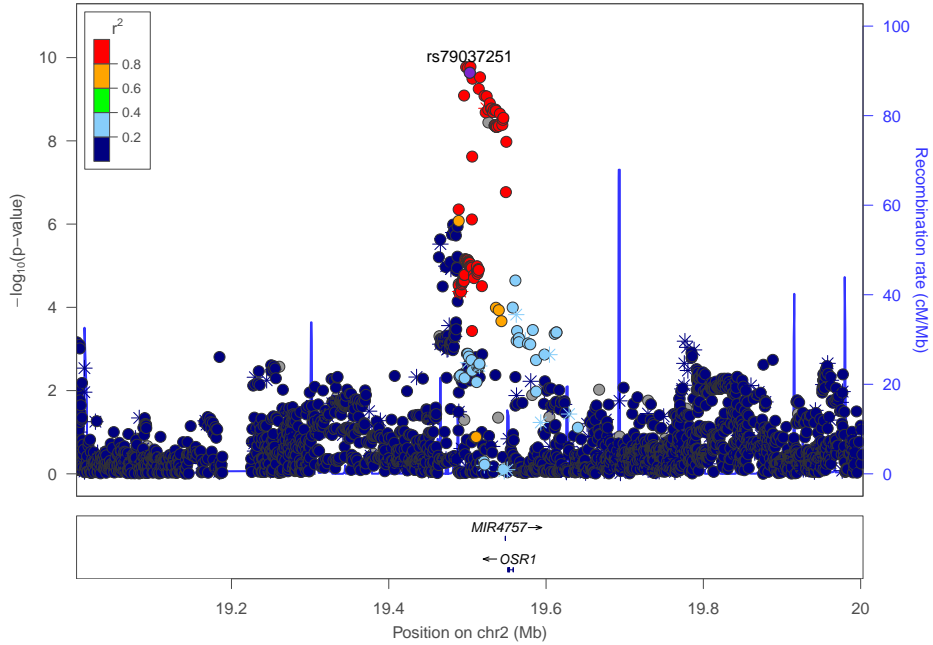

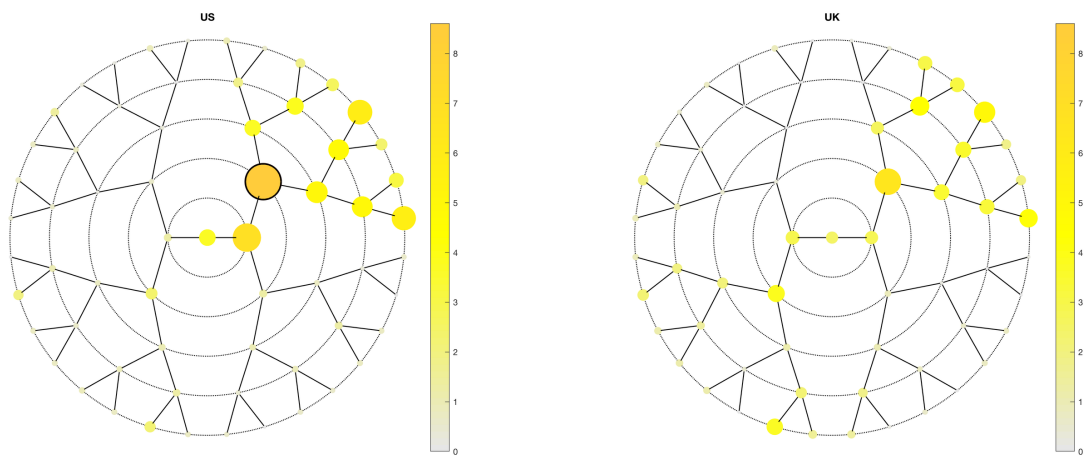

A

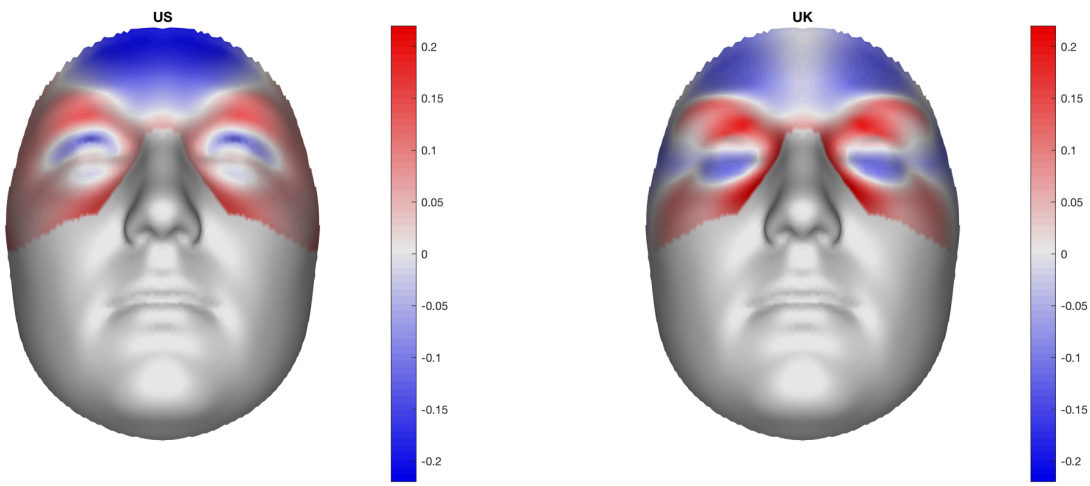

B

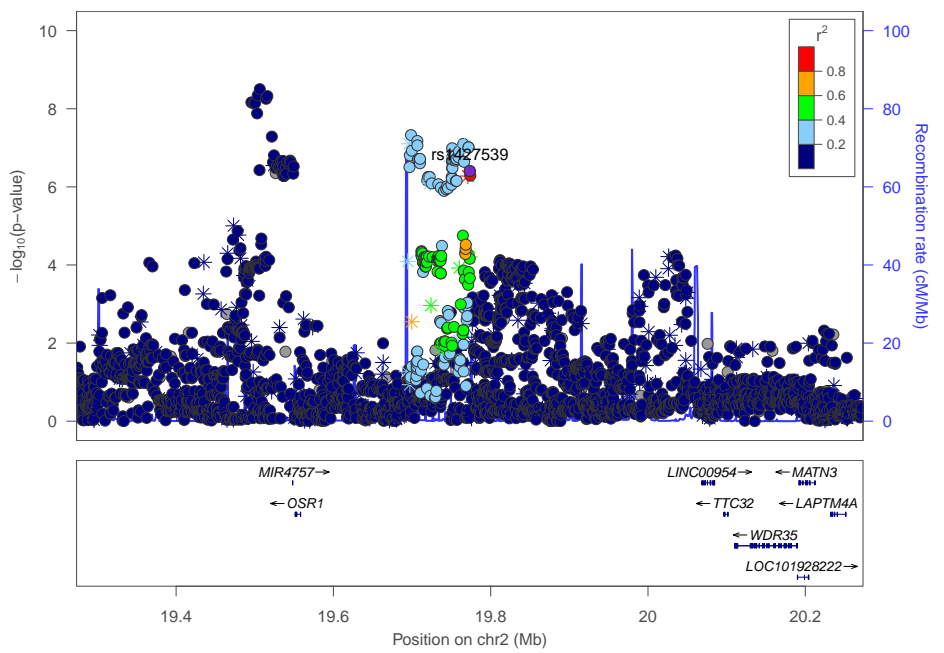

C

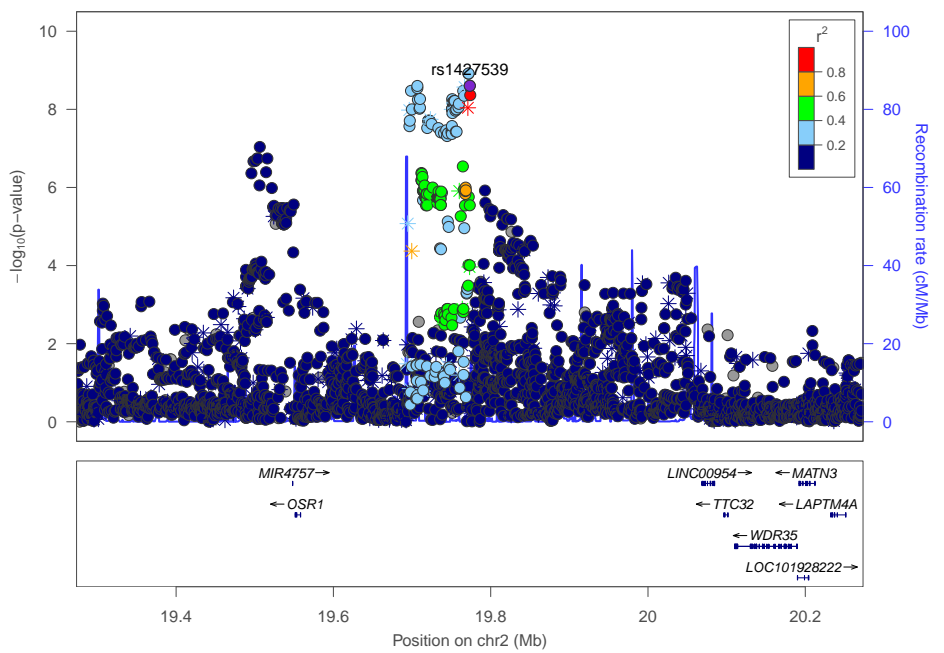

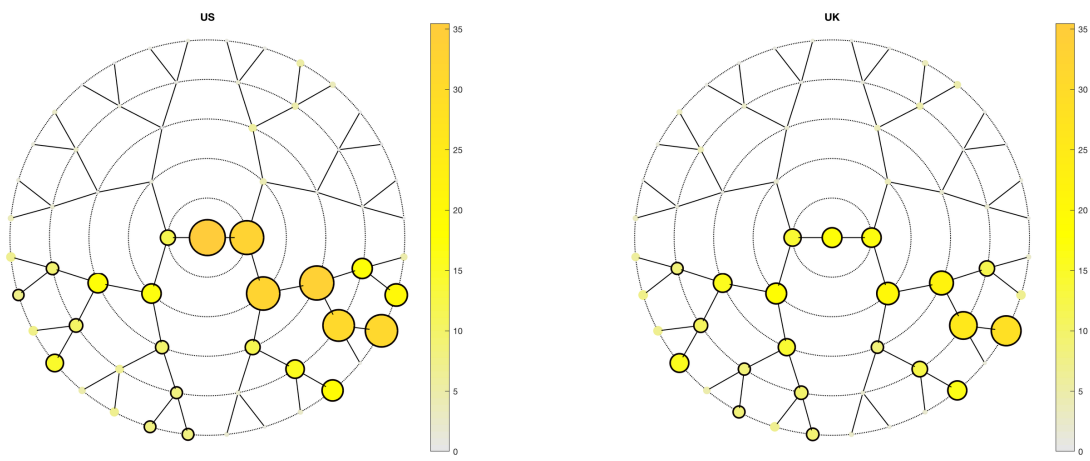

A

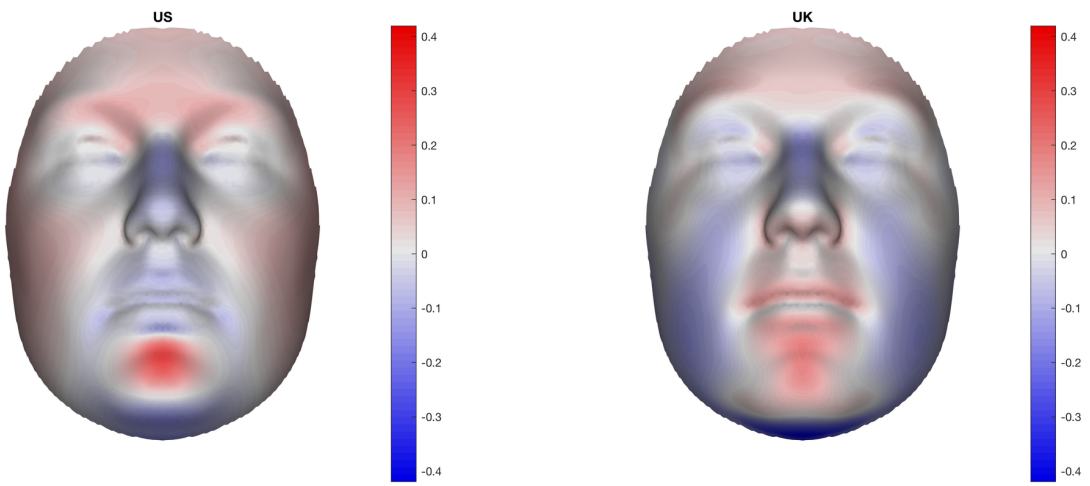

B

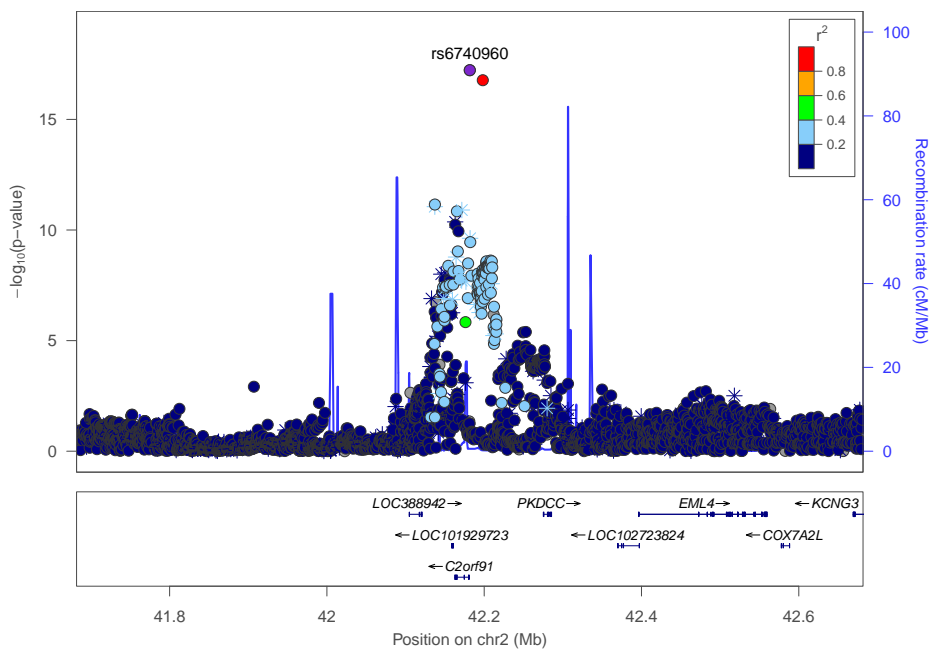

C

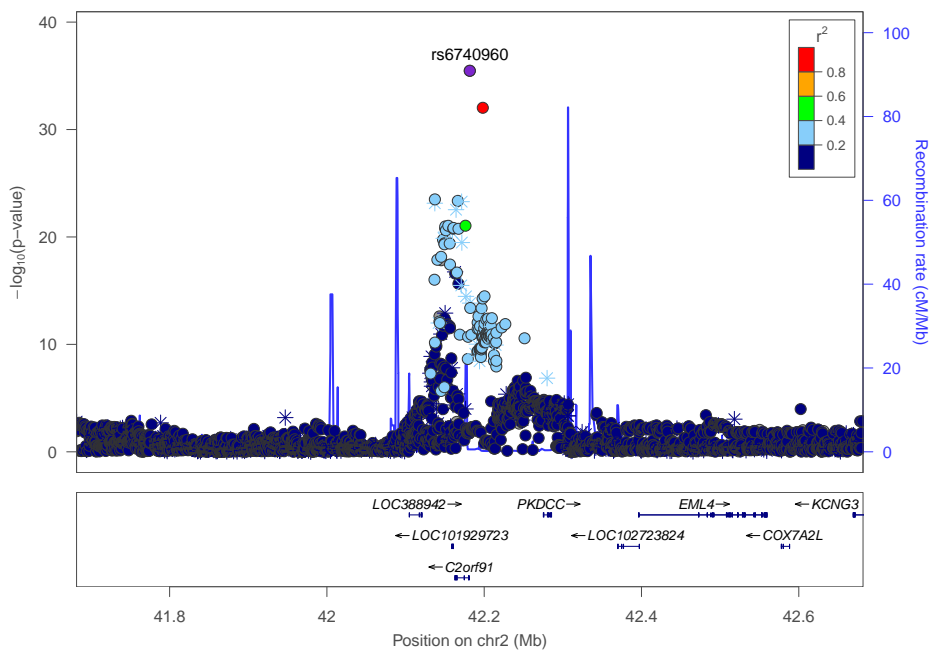

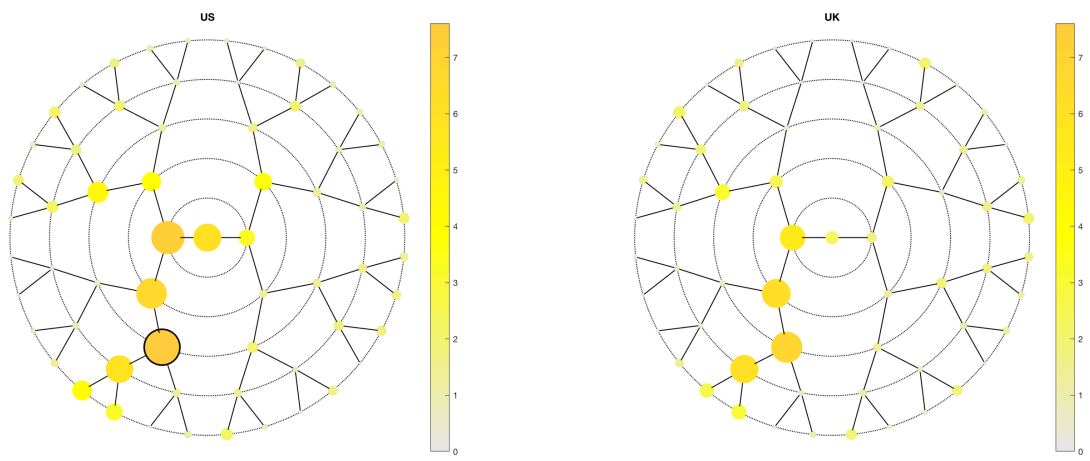

A

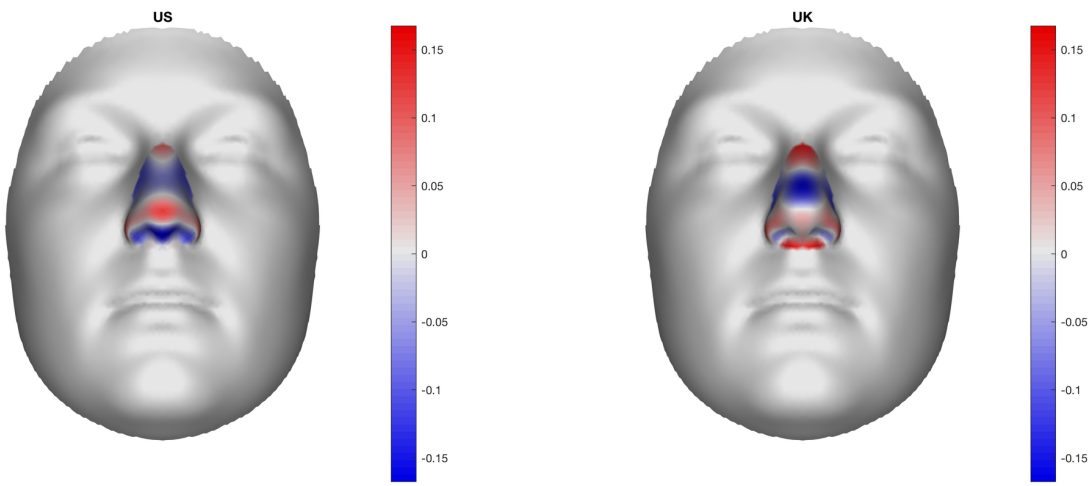

B

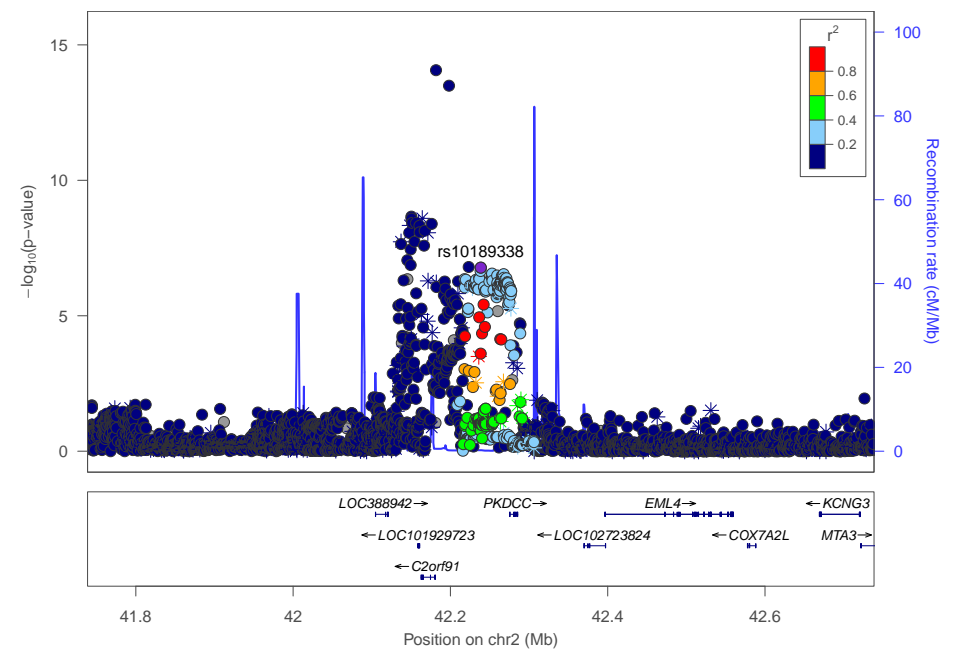

C

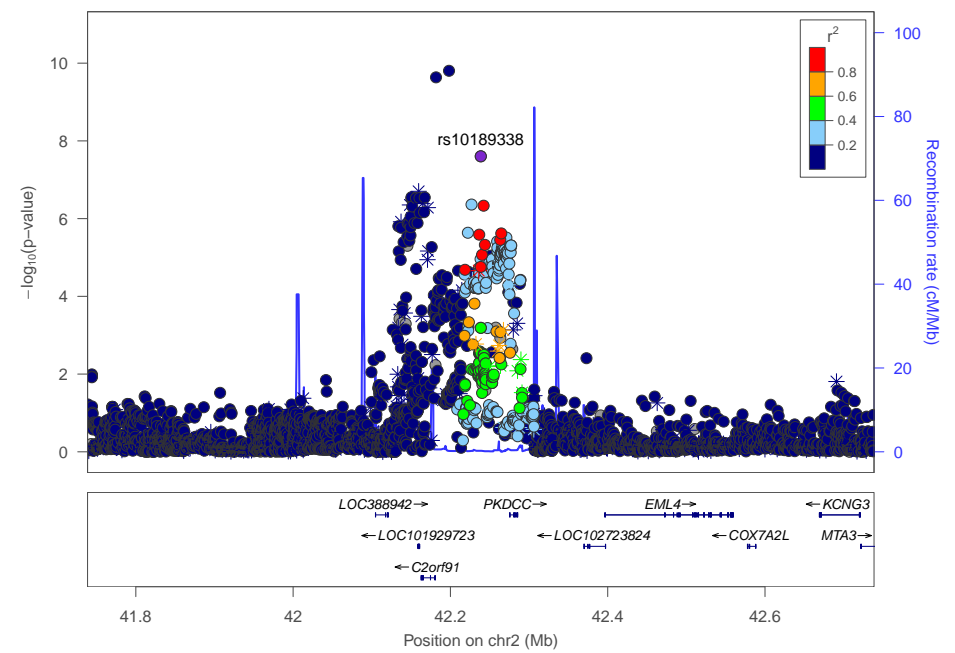



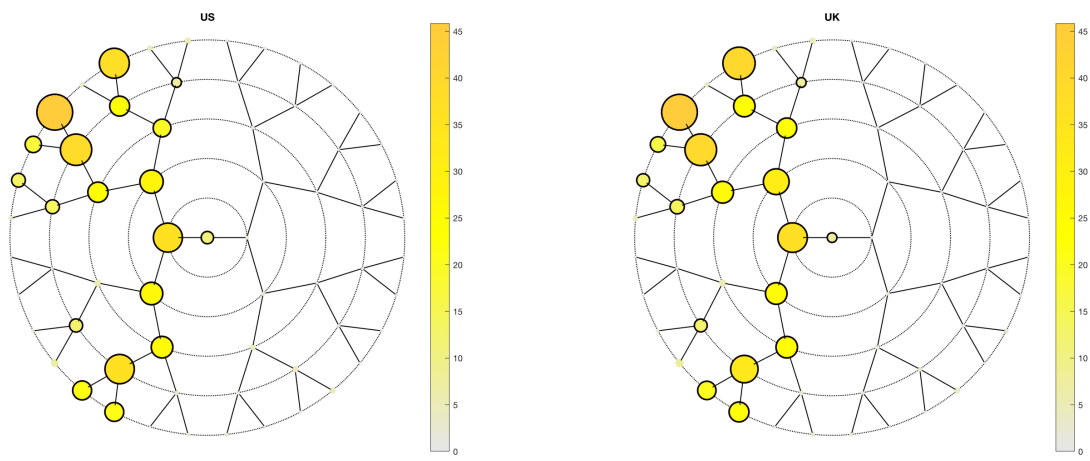

A

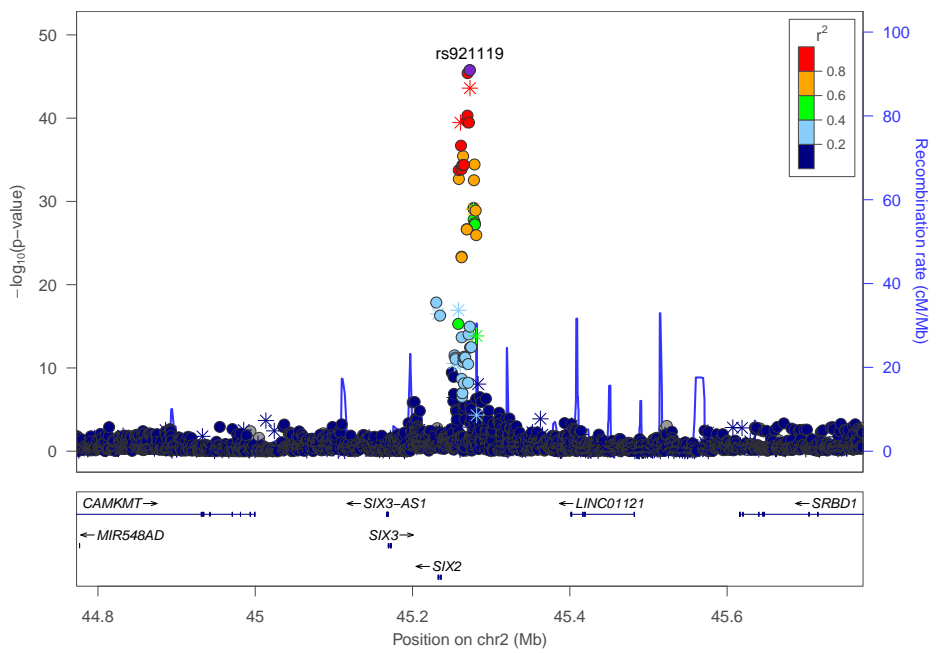

C

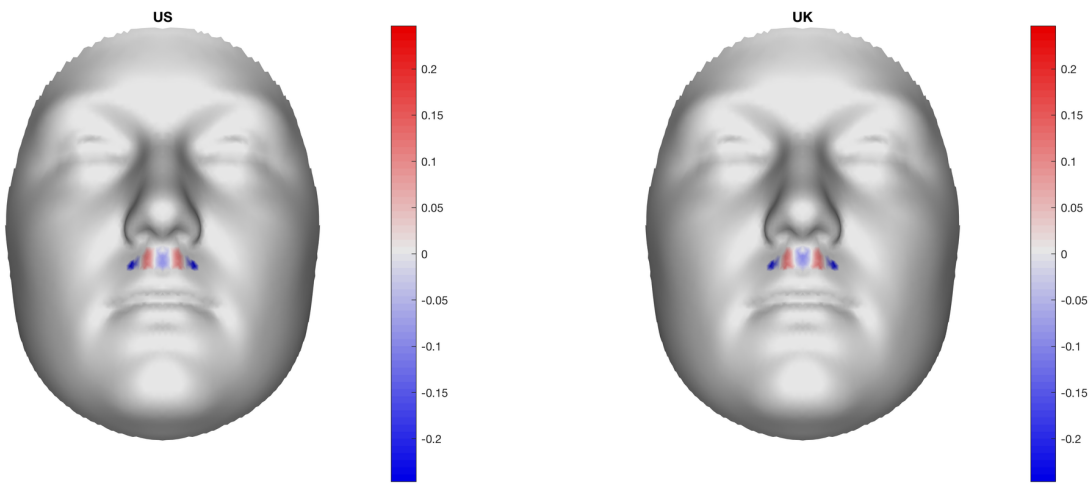

B

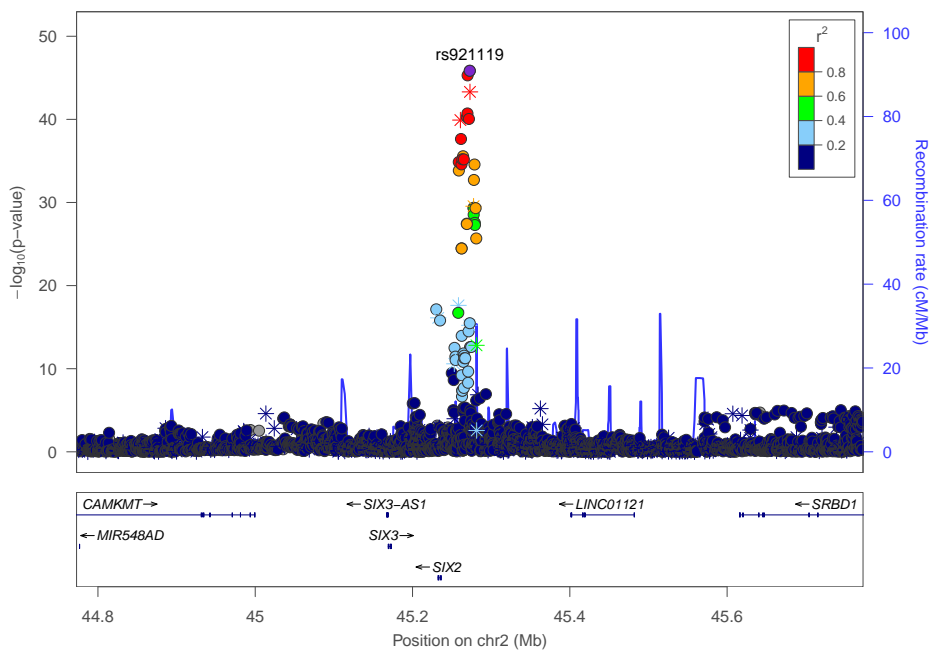

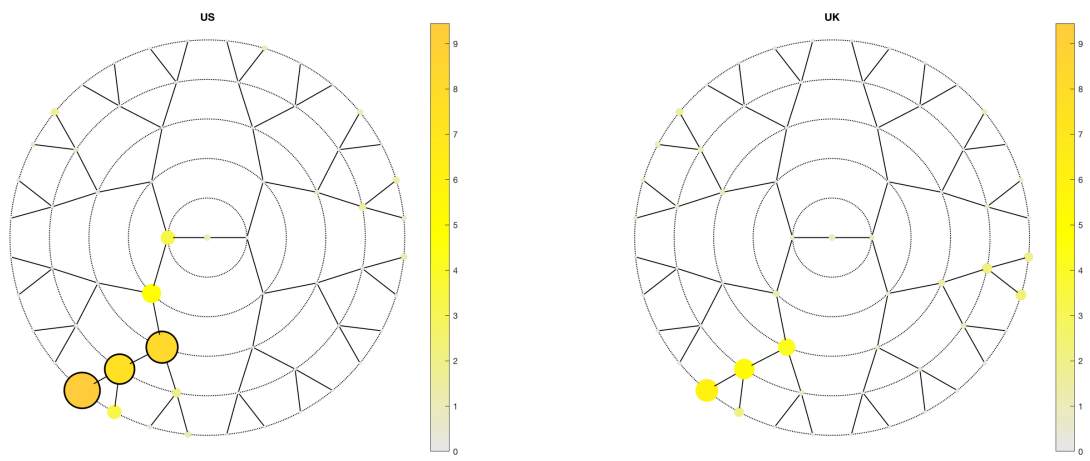

A

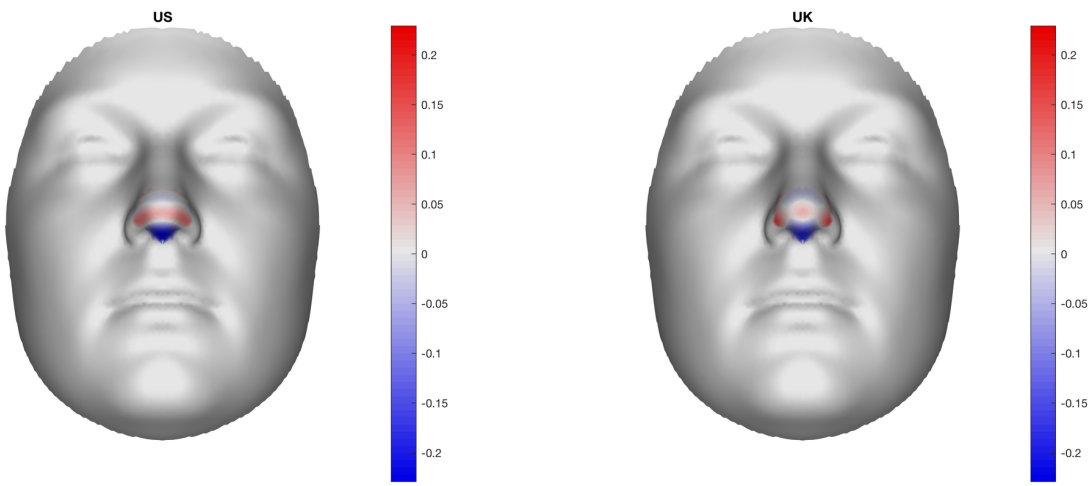

B

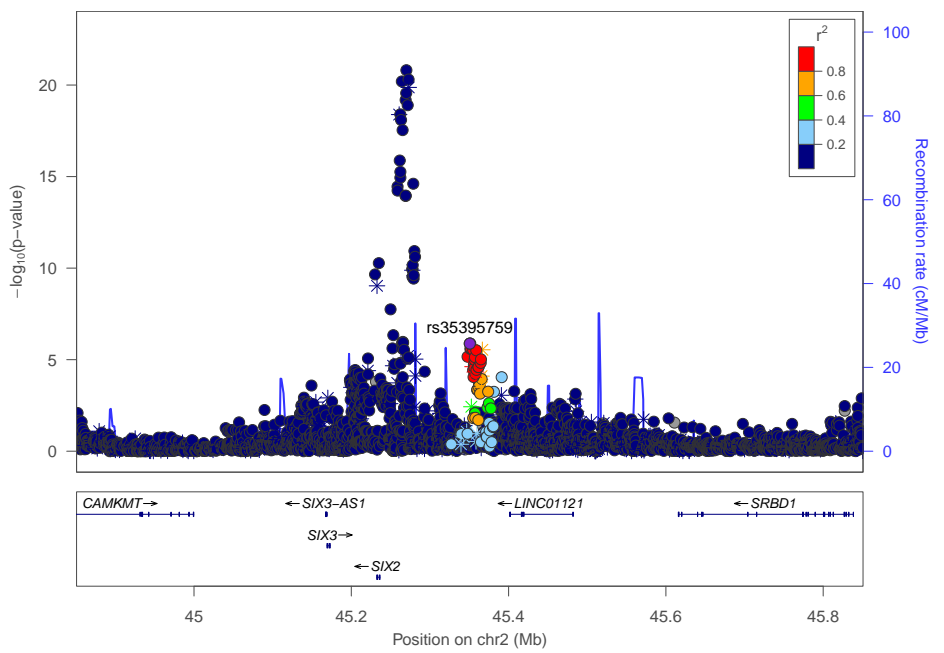

C

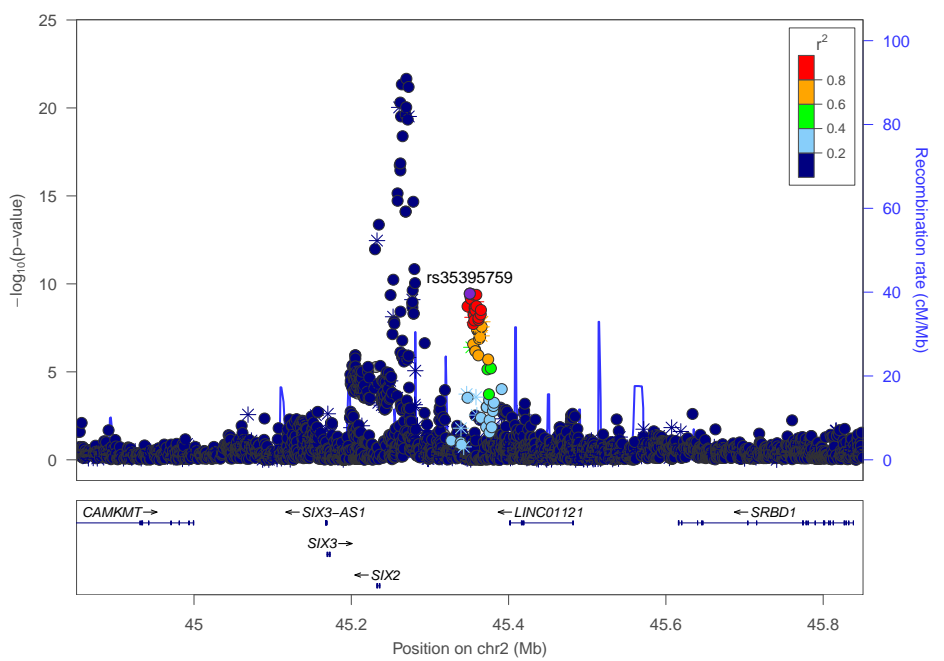

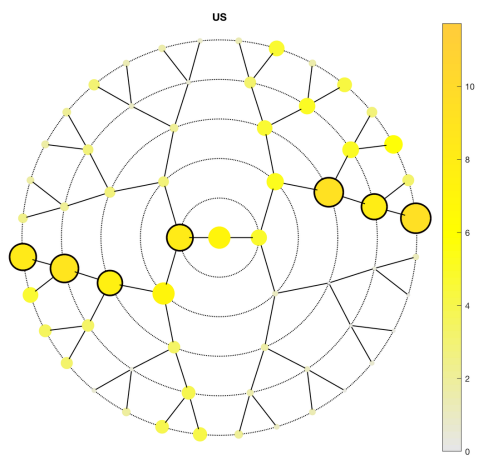

A

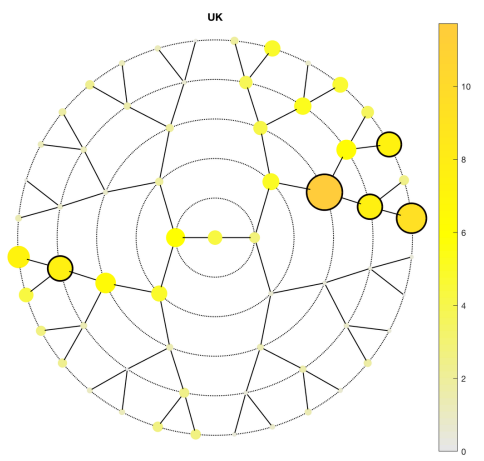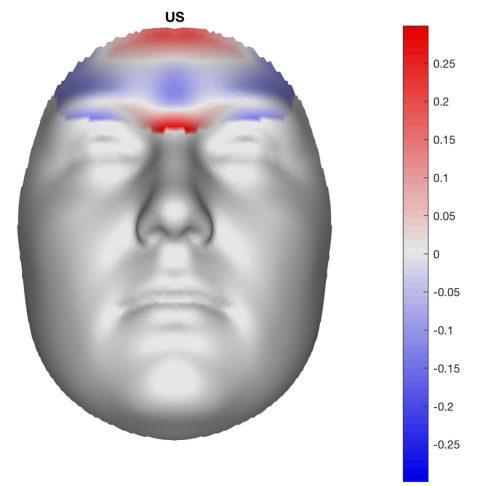

B

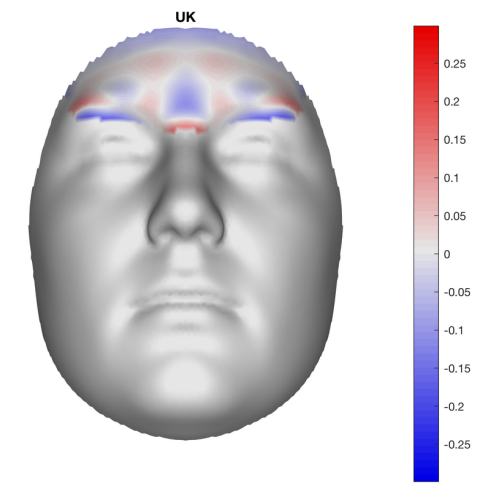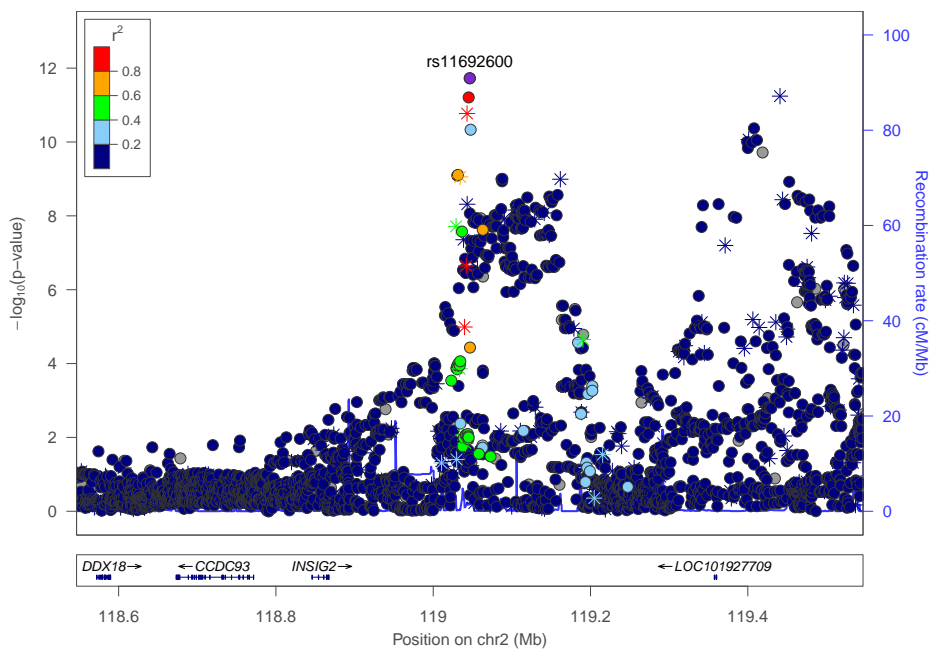

C

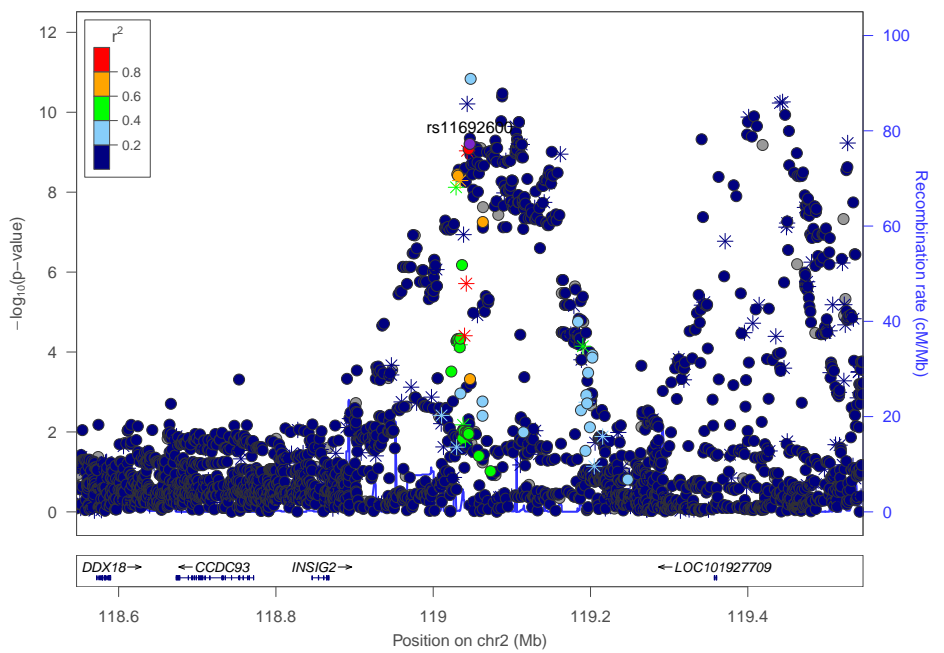



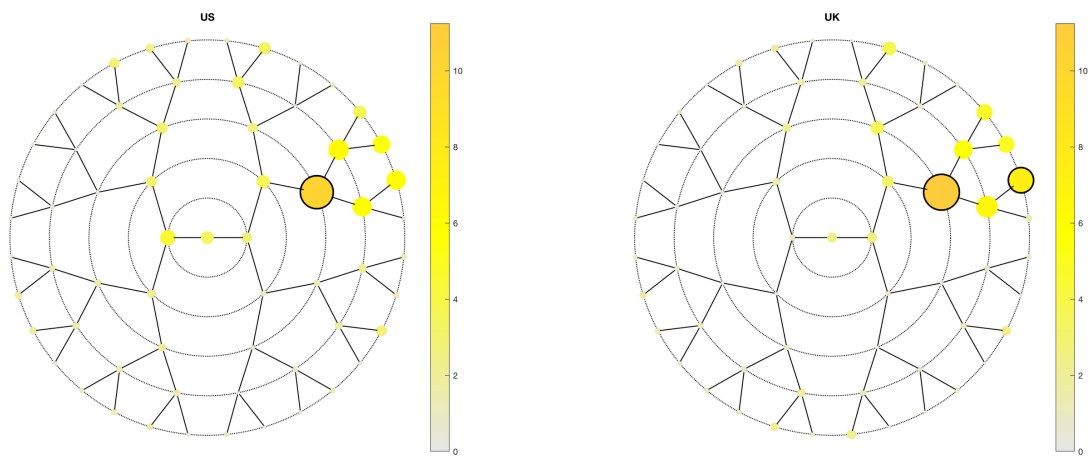

A

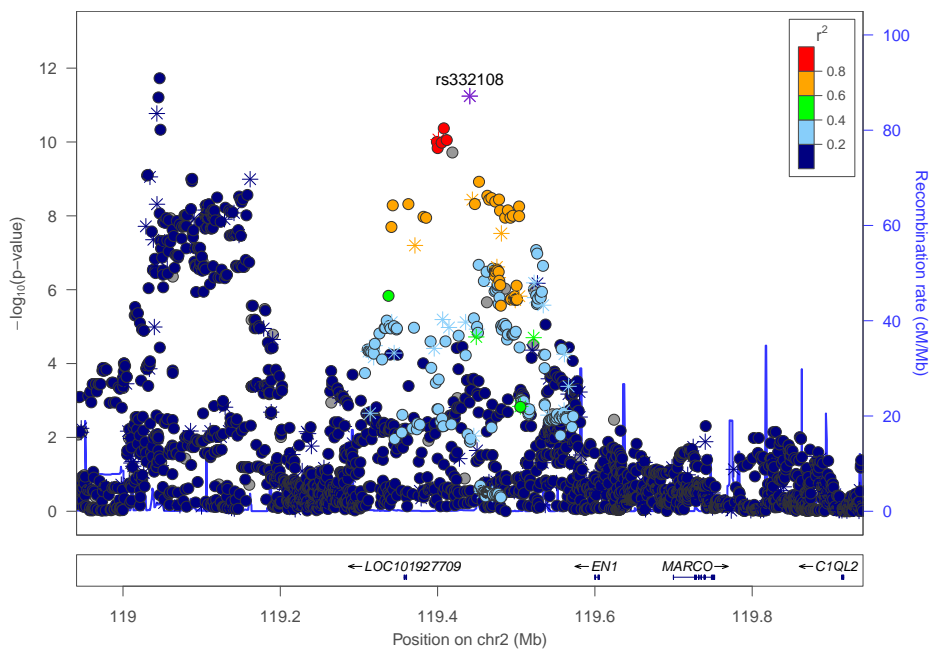

C

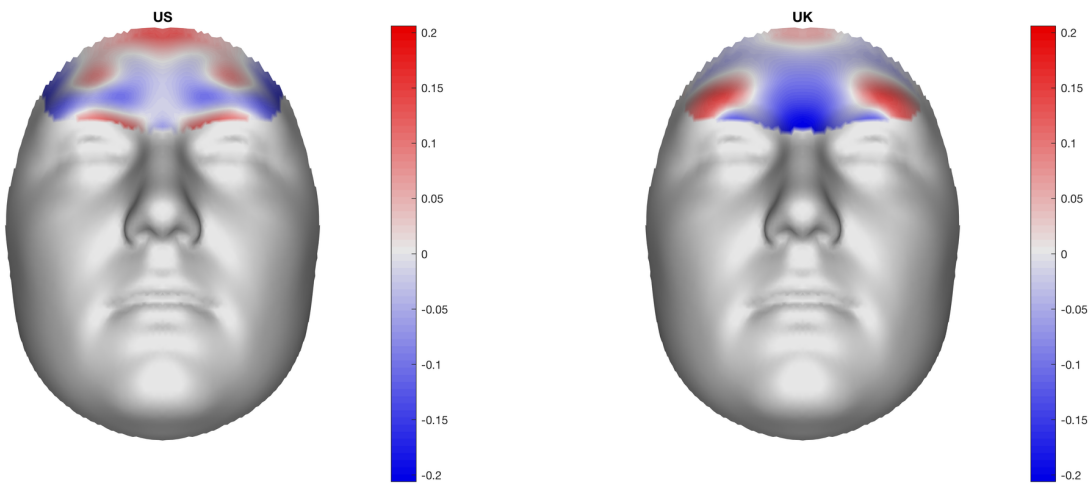

B

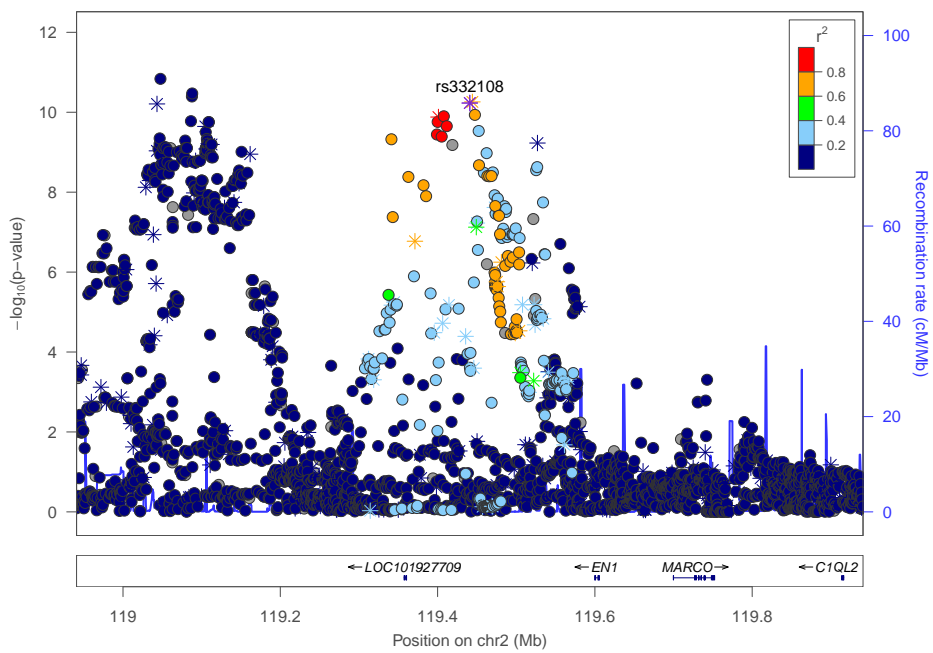

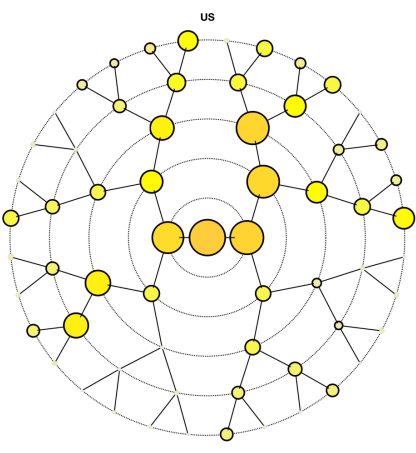

A

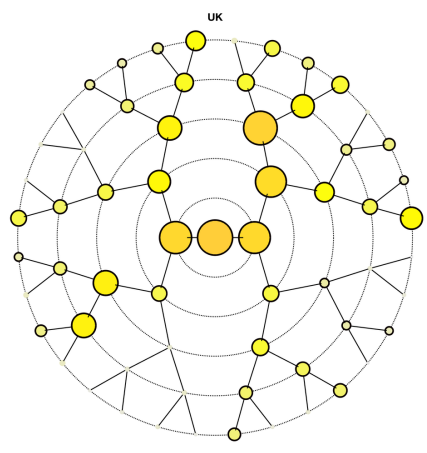

B

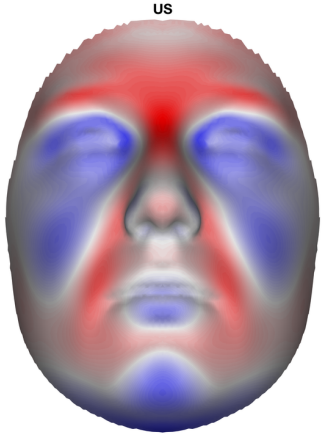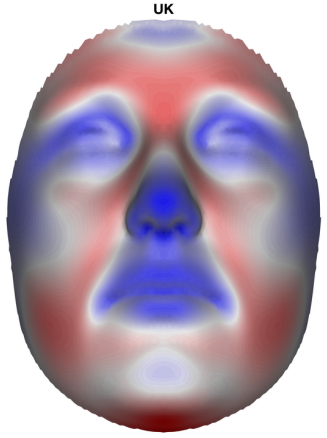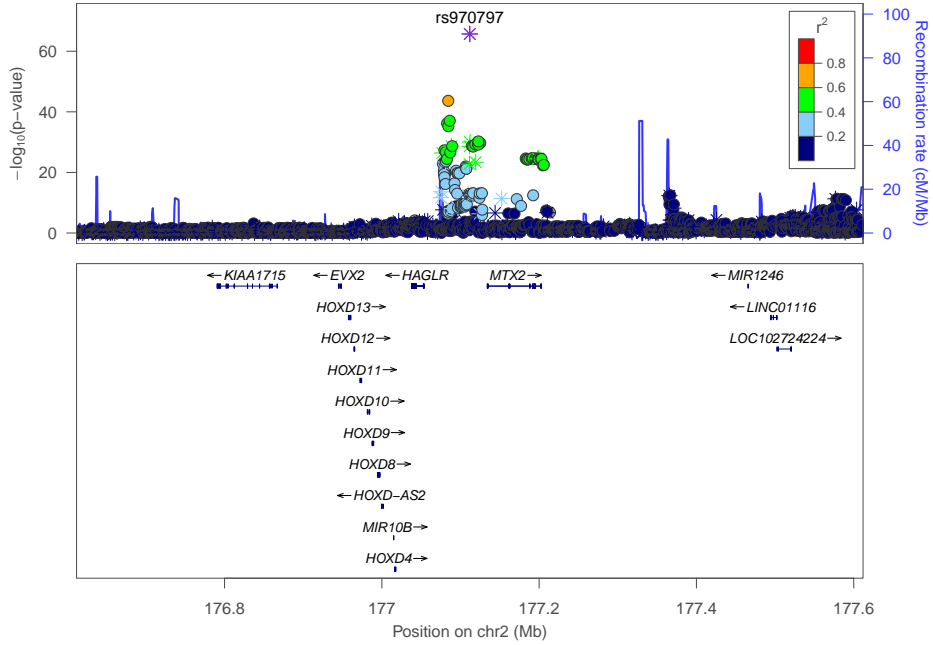

C

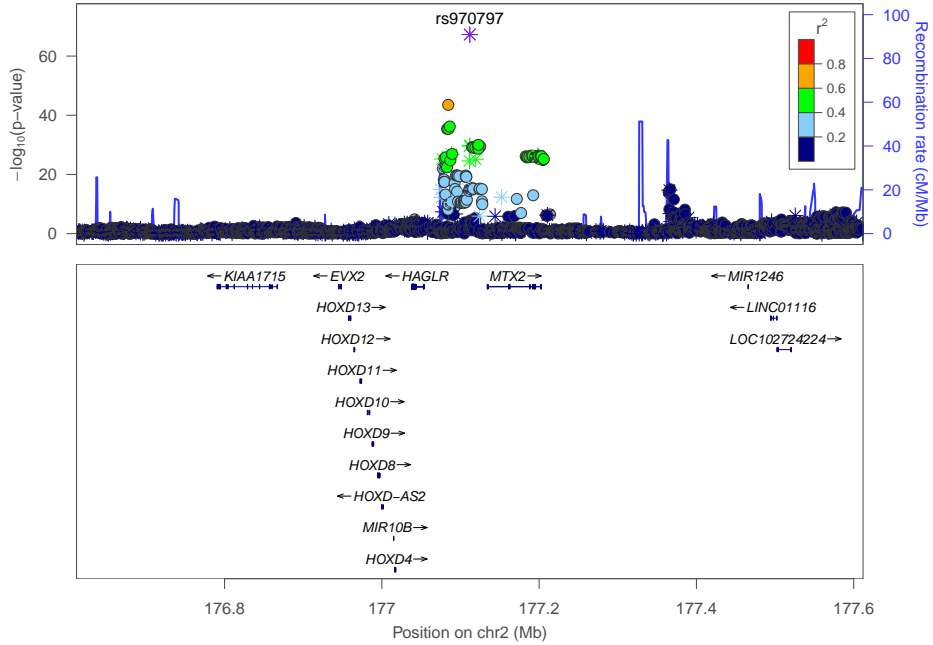

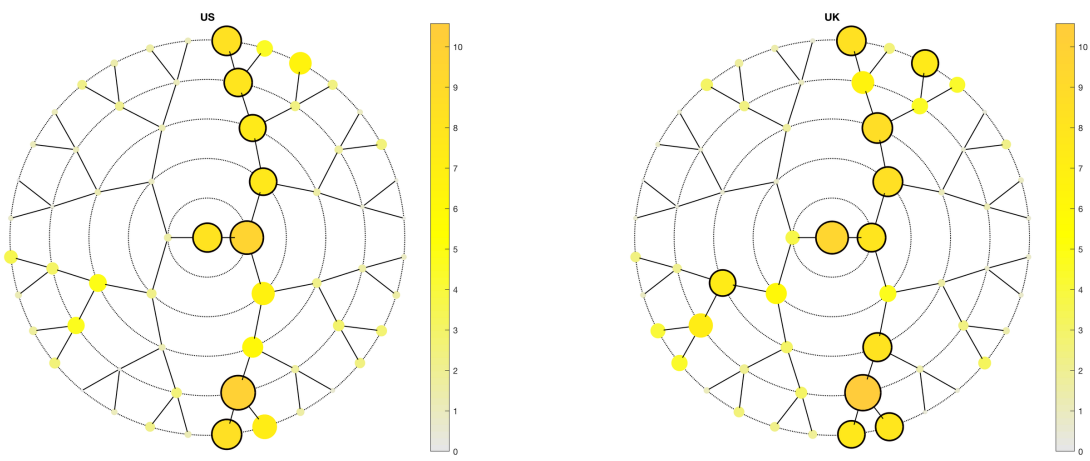

A

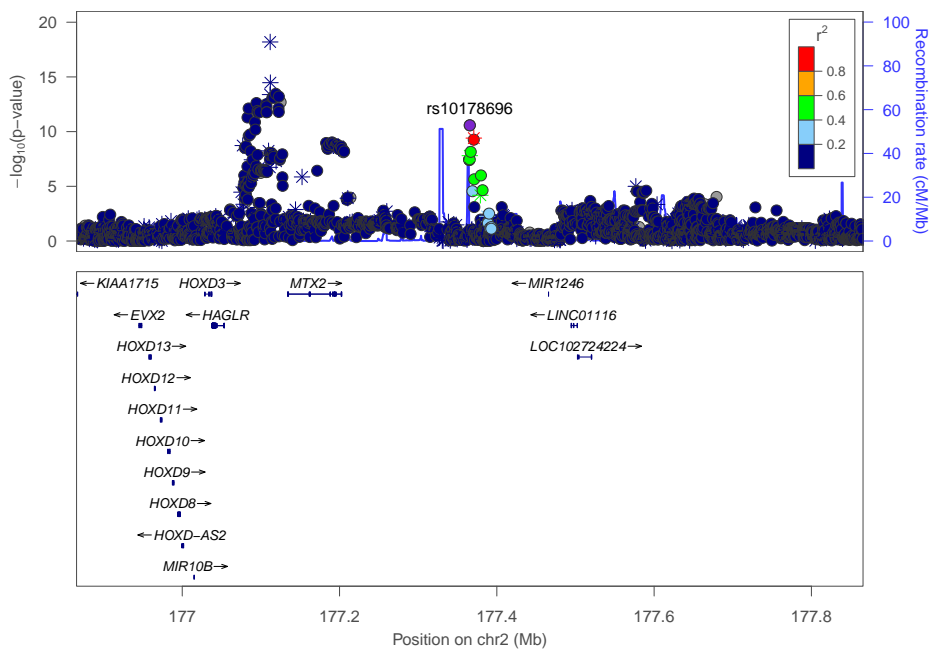

C

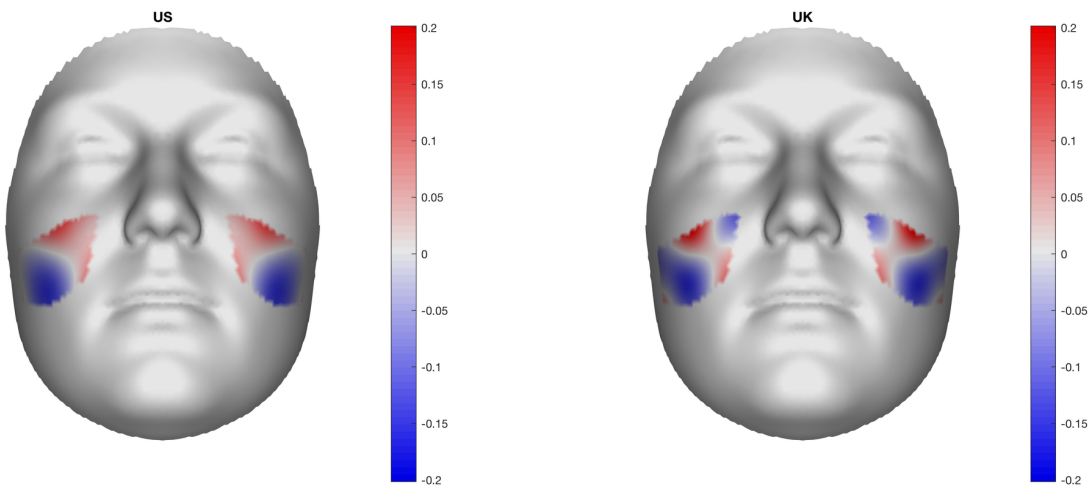

B

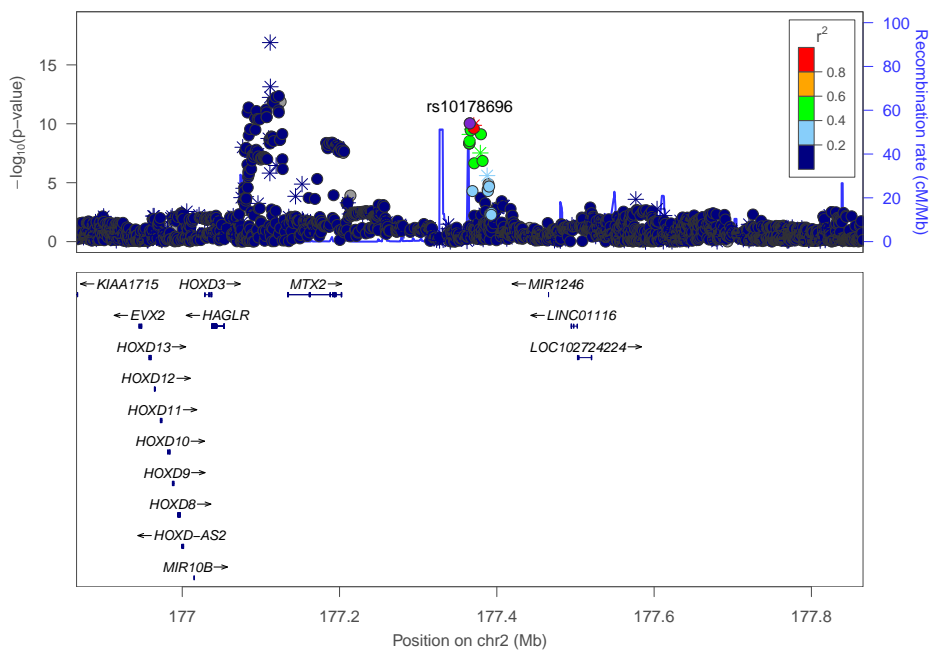

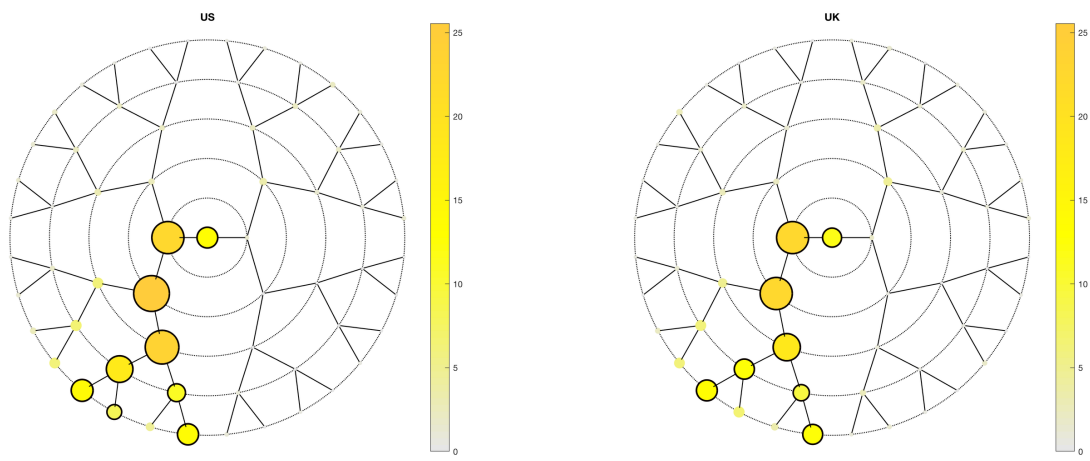

A

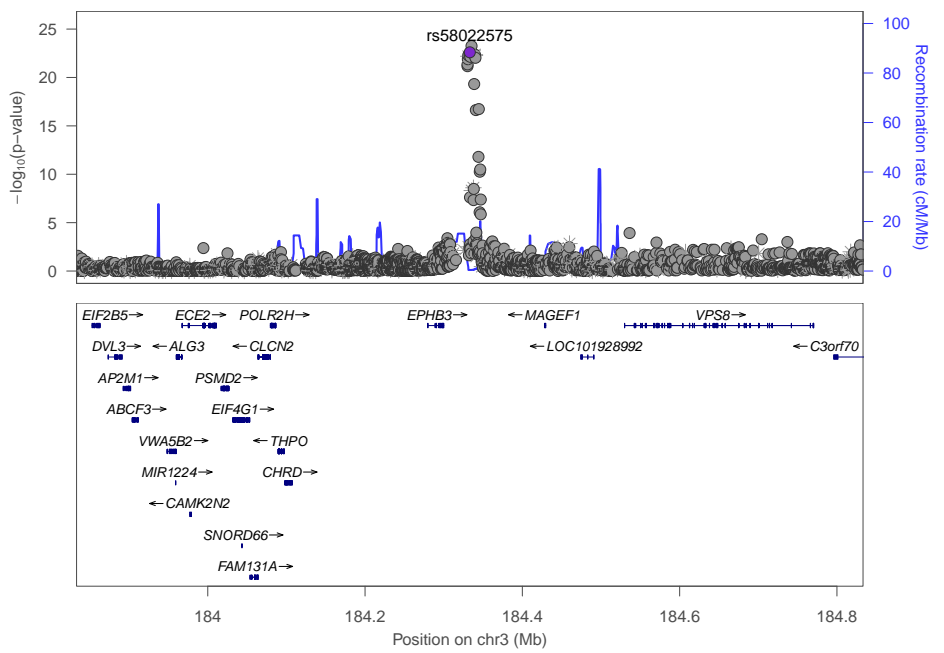

C

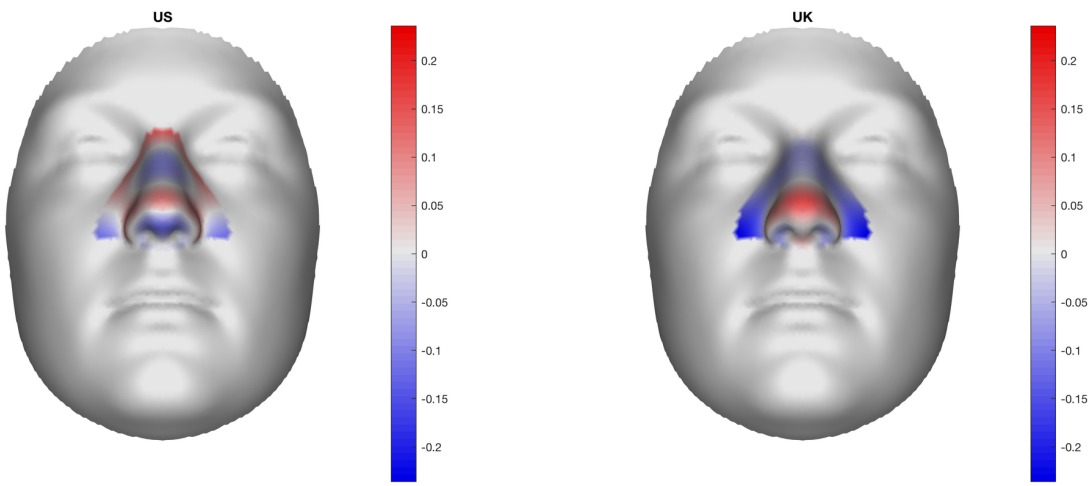

B

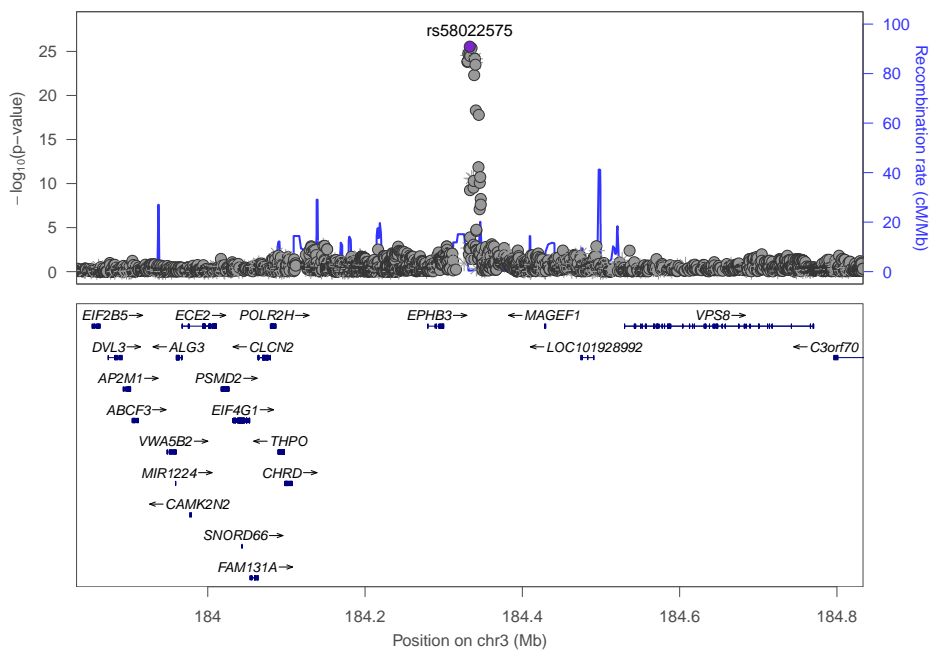

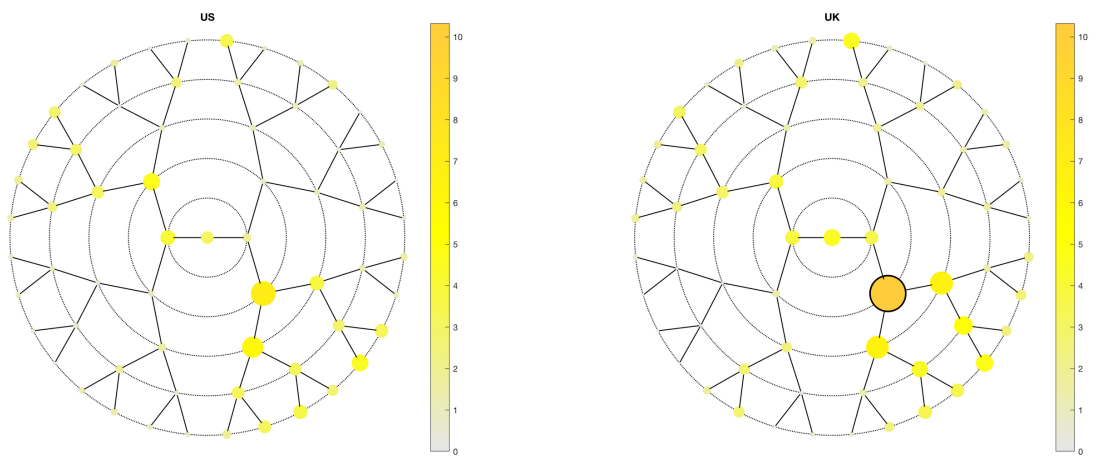

A

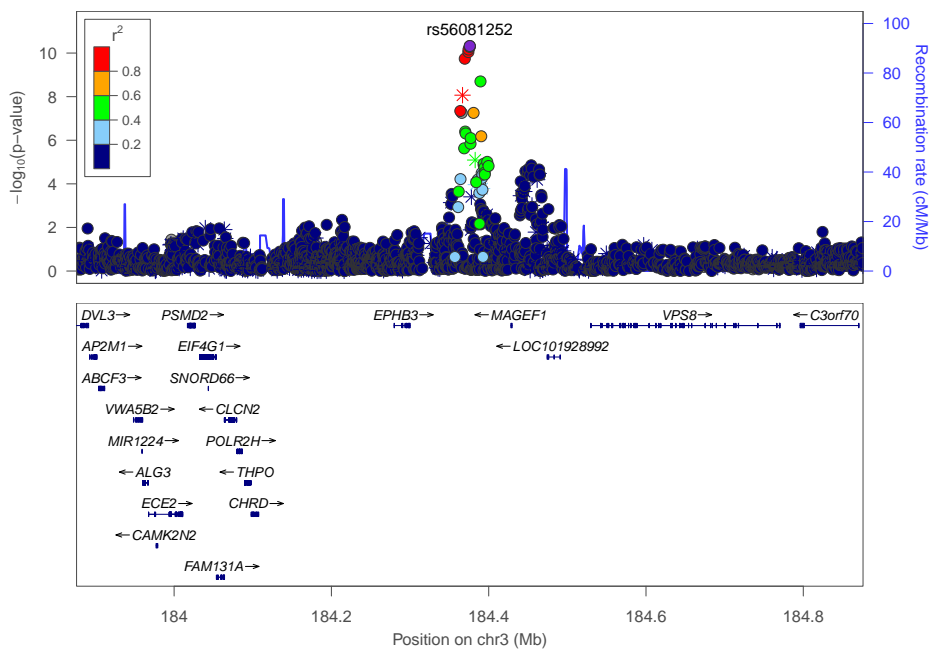

C

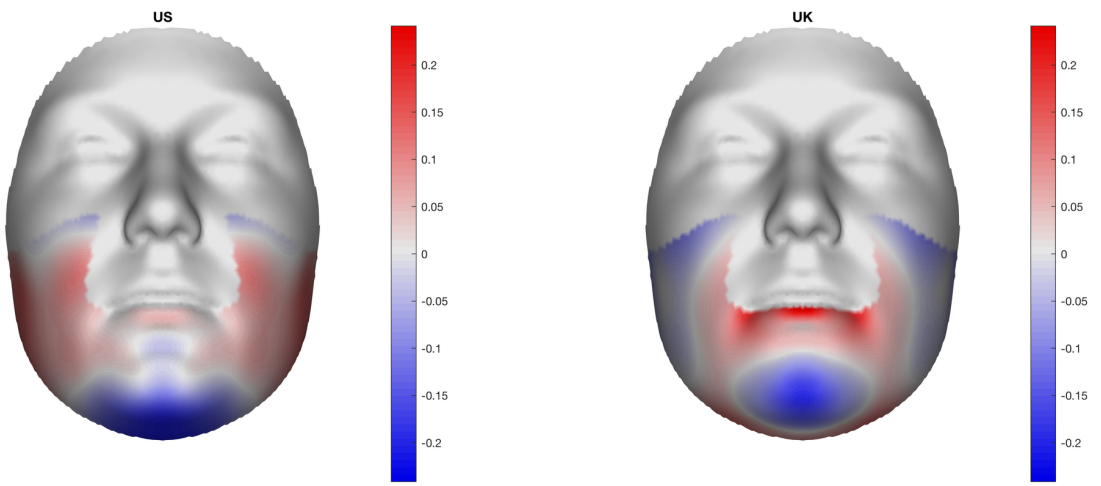

B

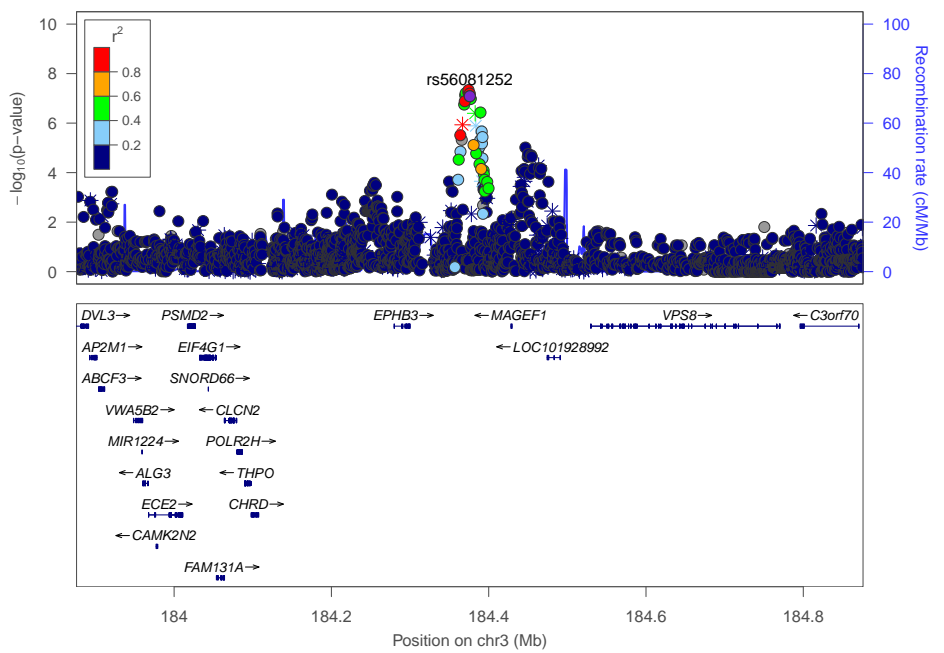



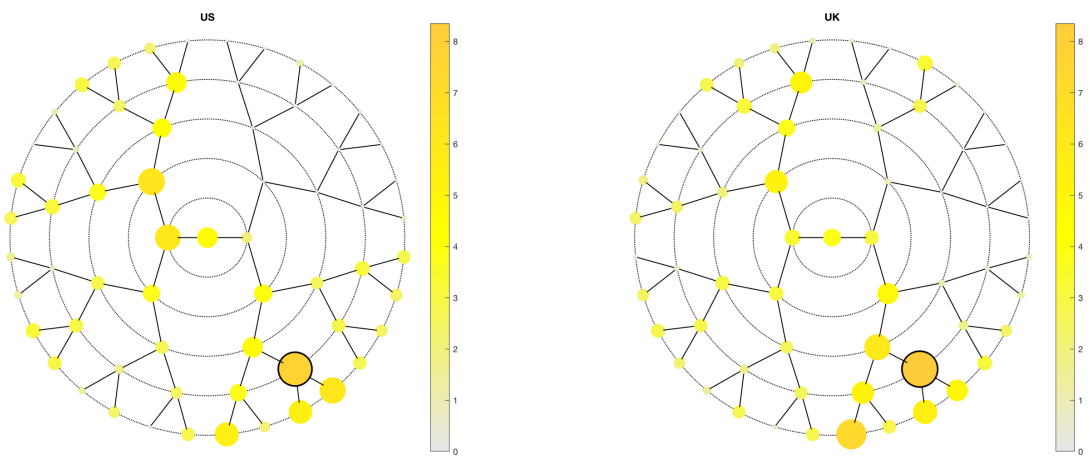

A

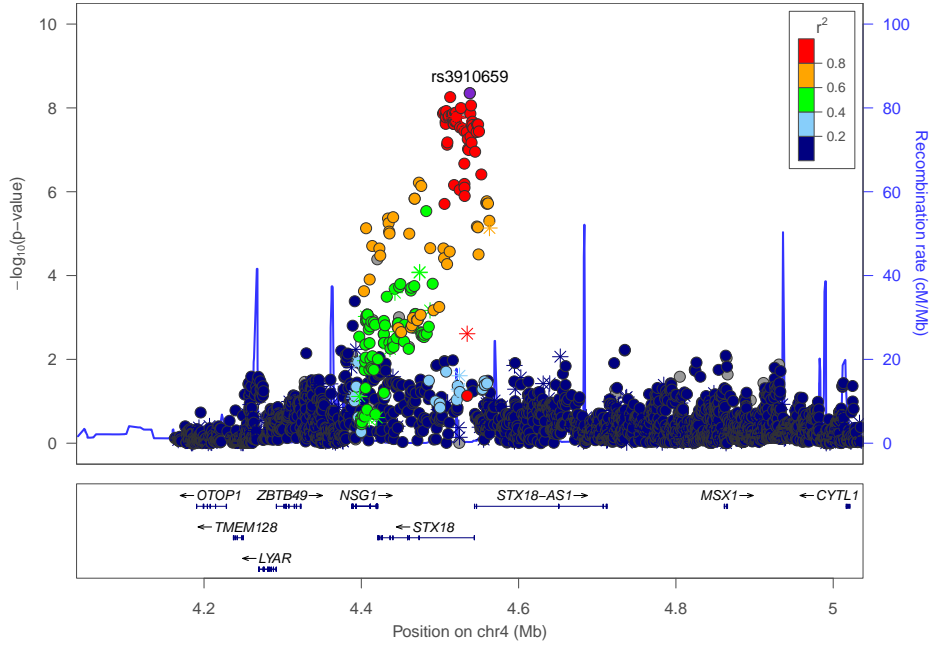

C

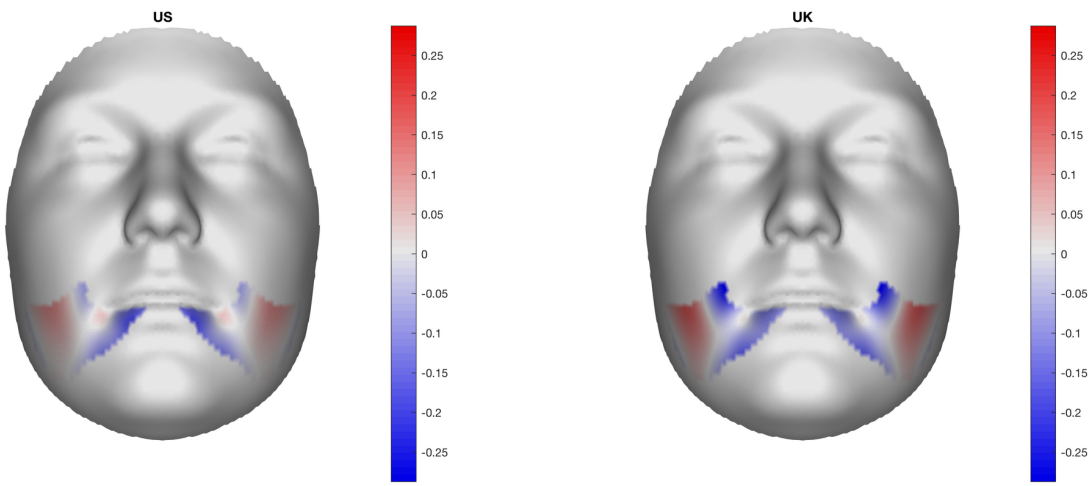

B

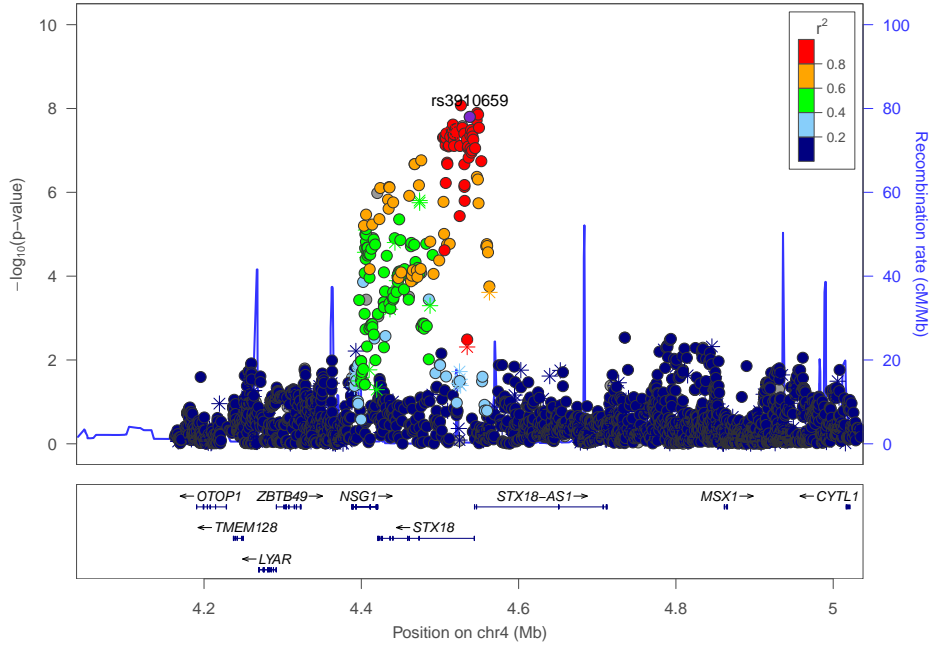

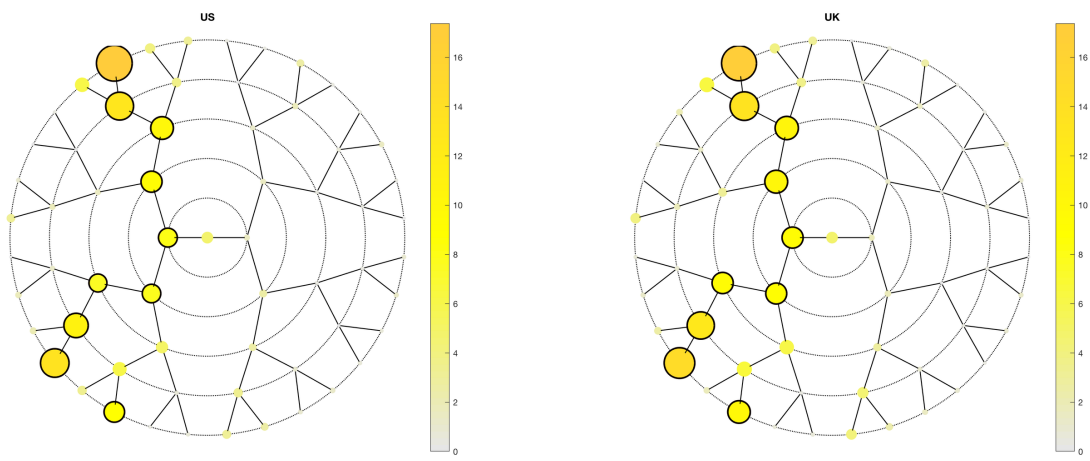

A

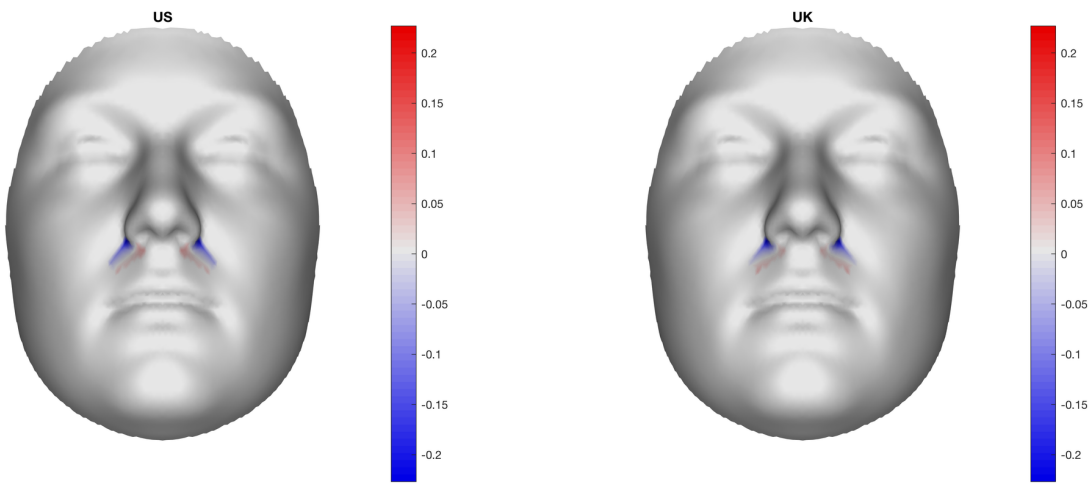

B

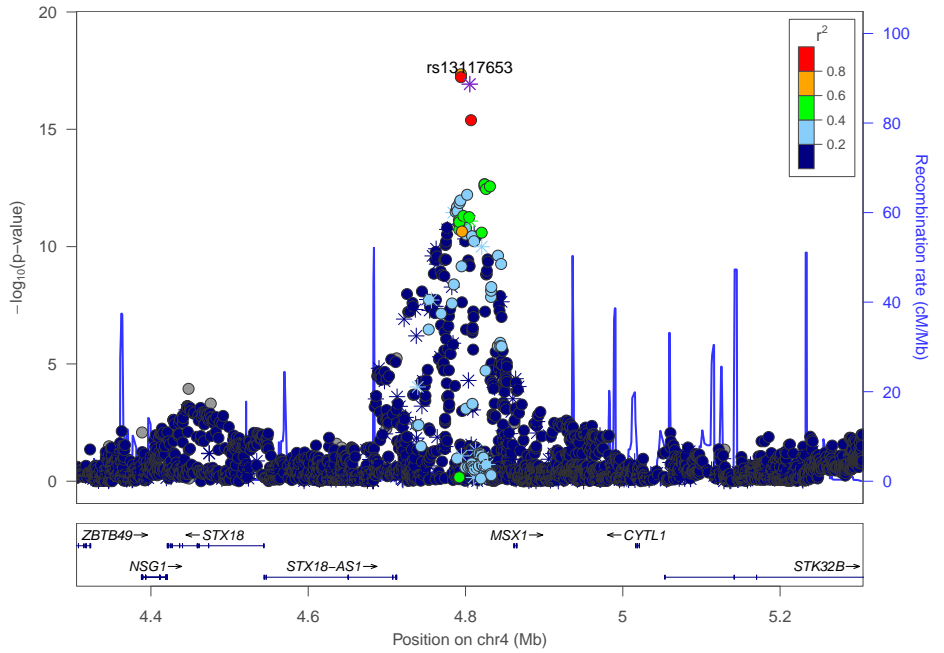

C

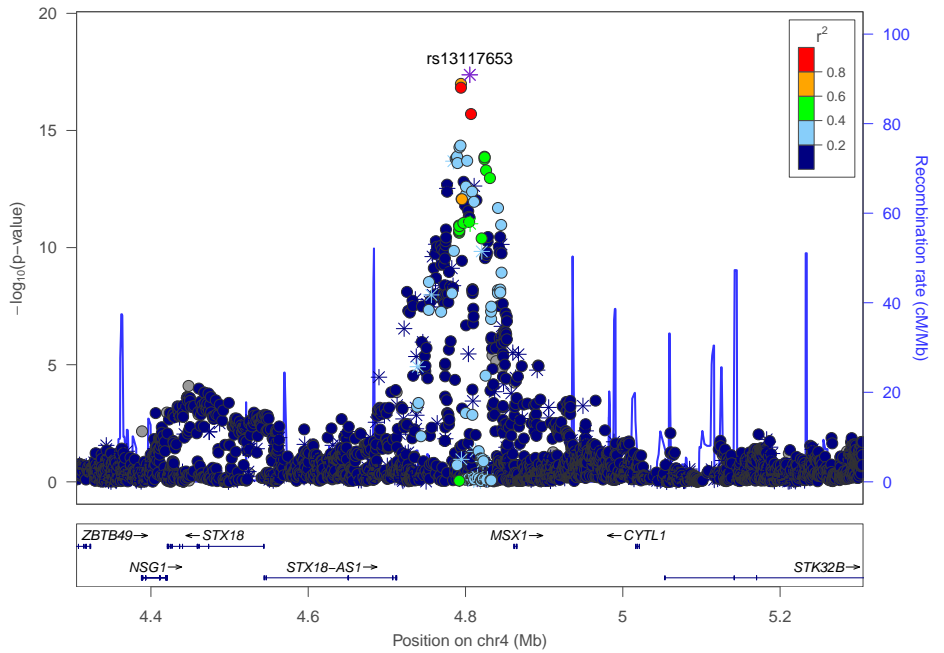

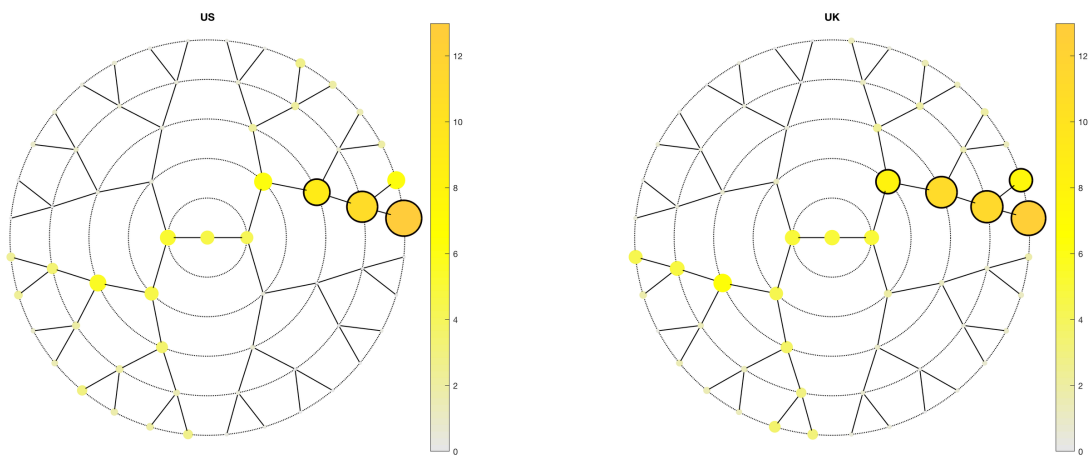

A

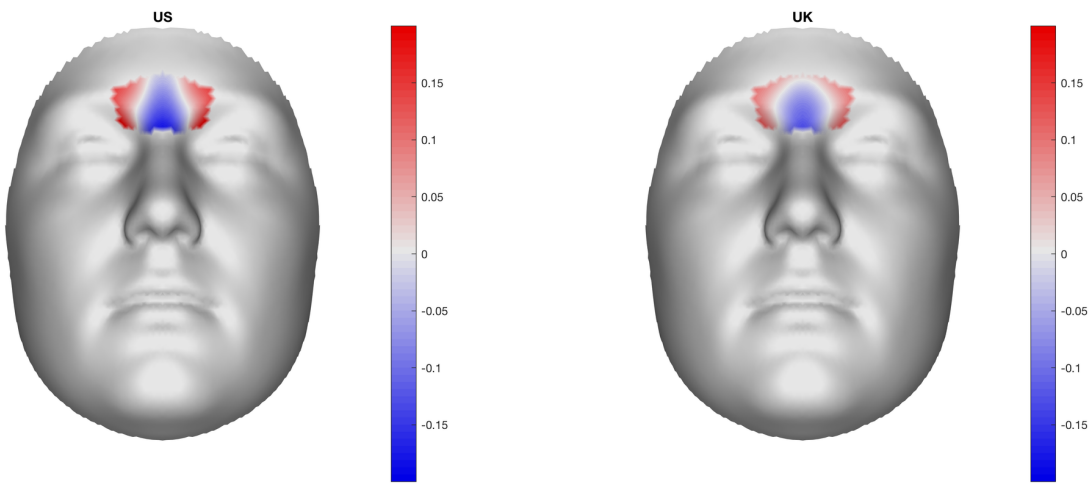

B

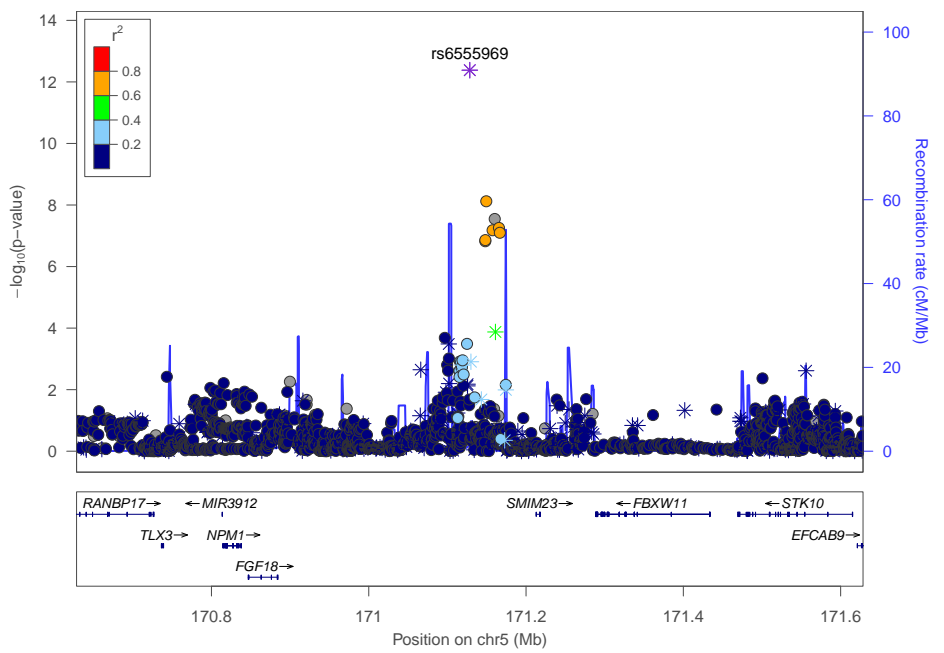

C

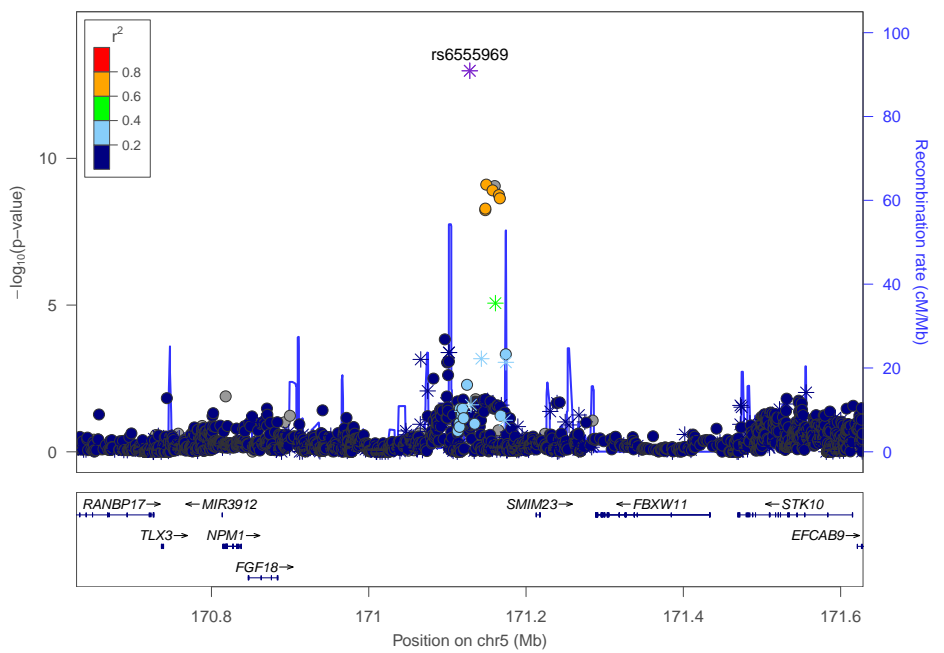



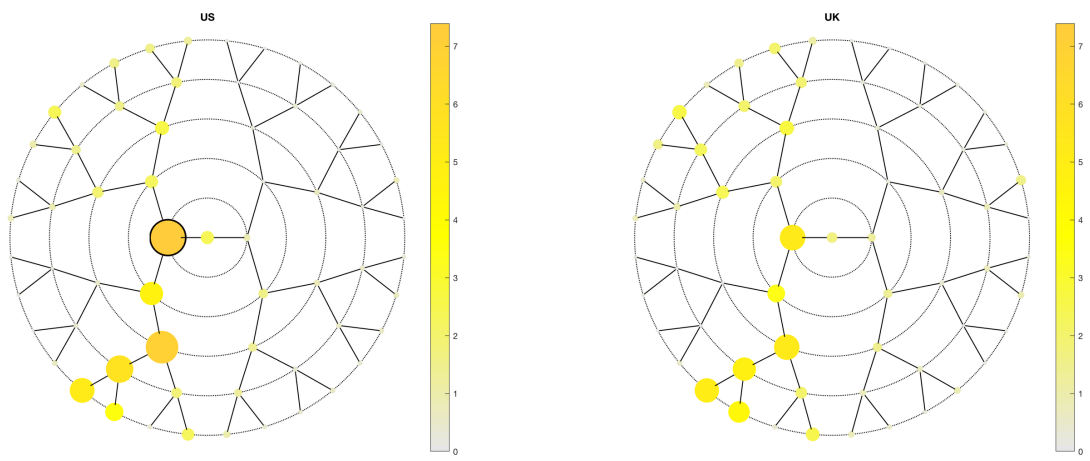

A

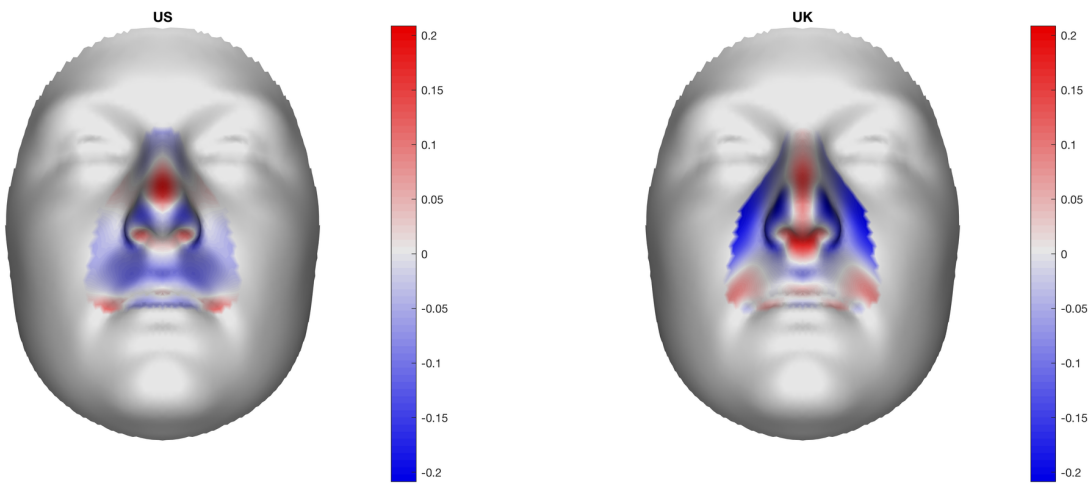

B

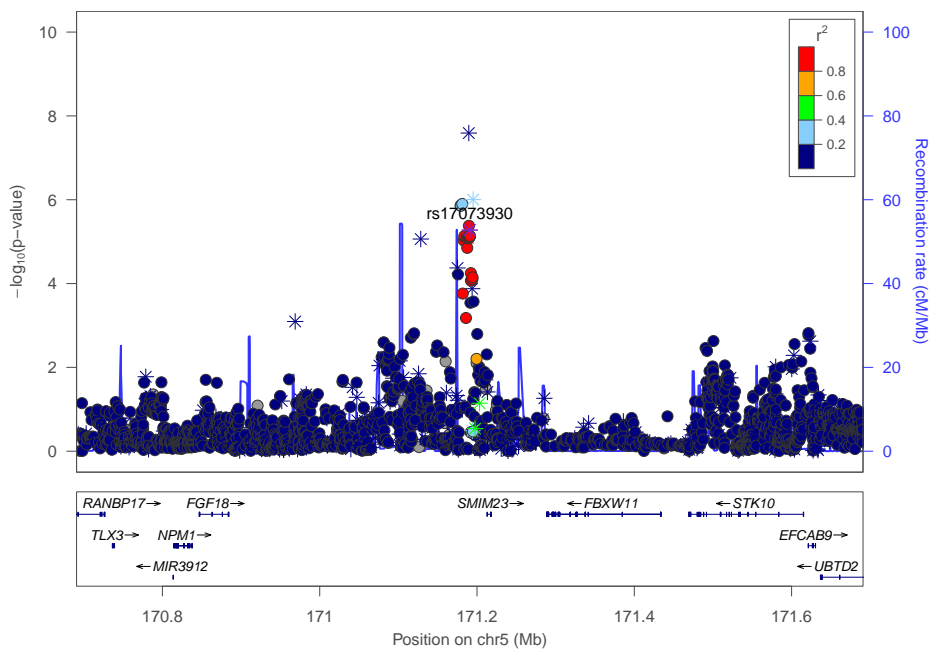

C

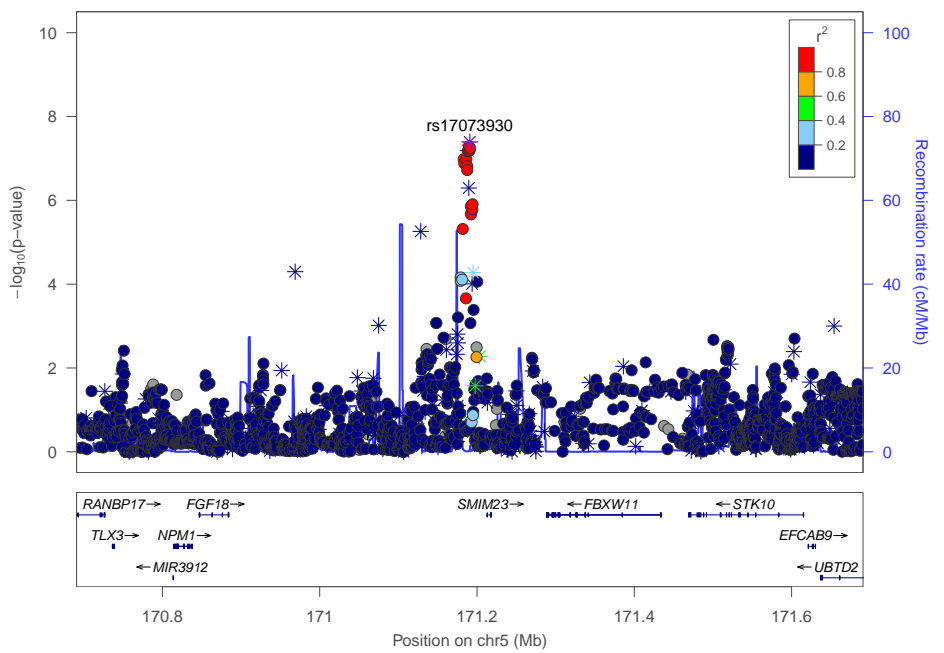

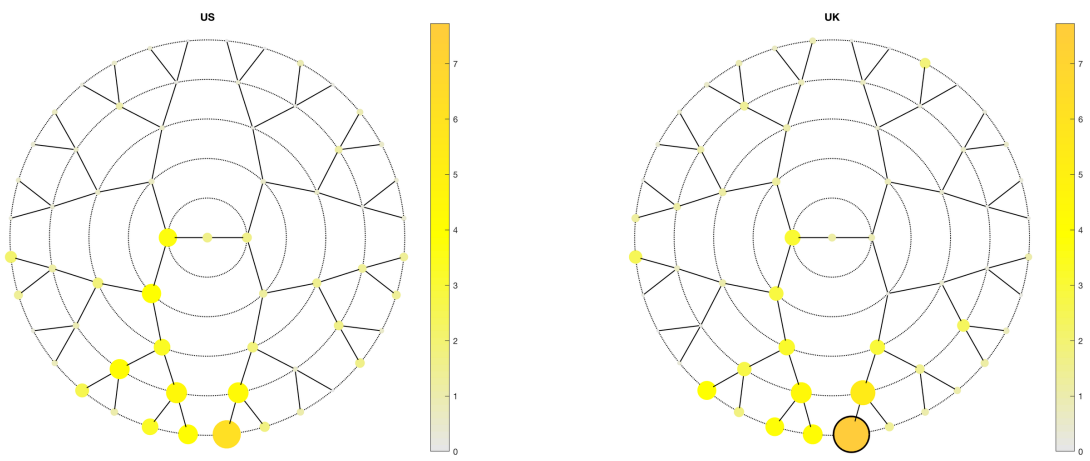

A

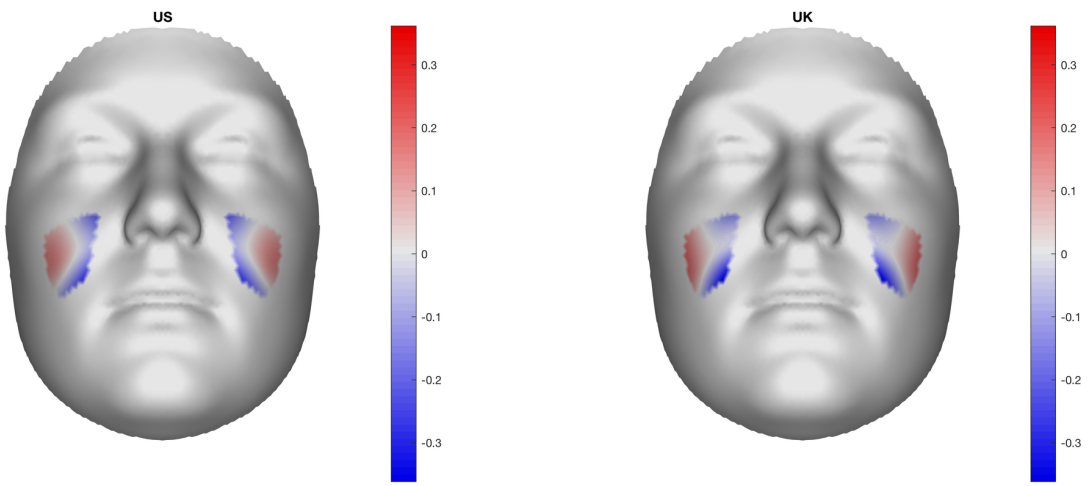

B

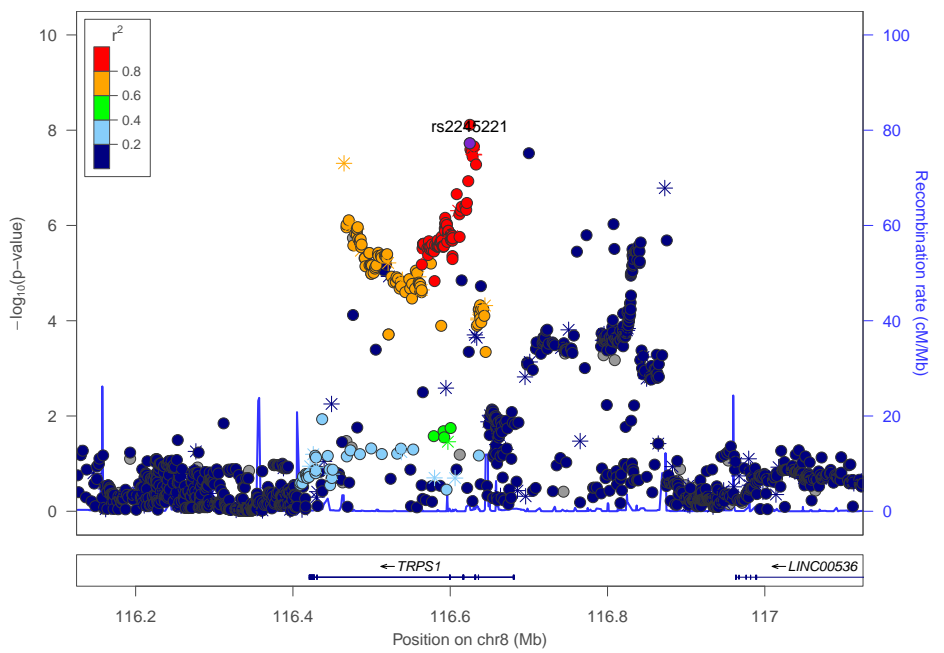

C

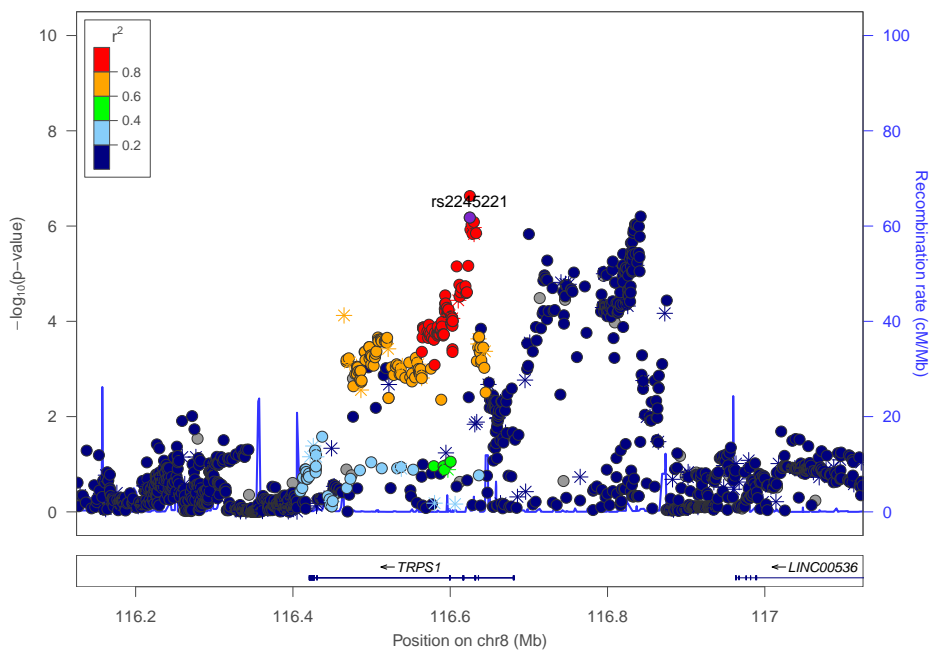

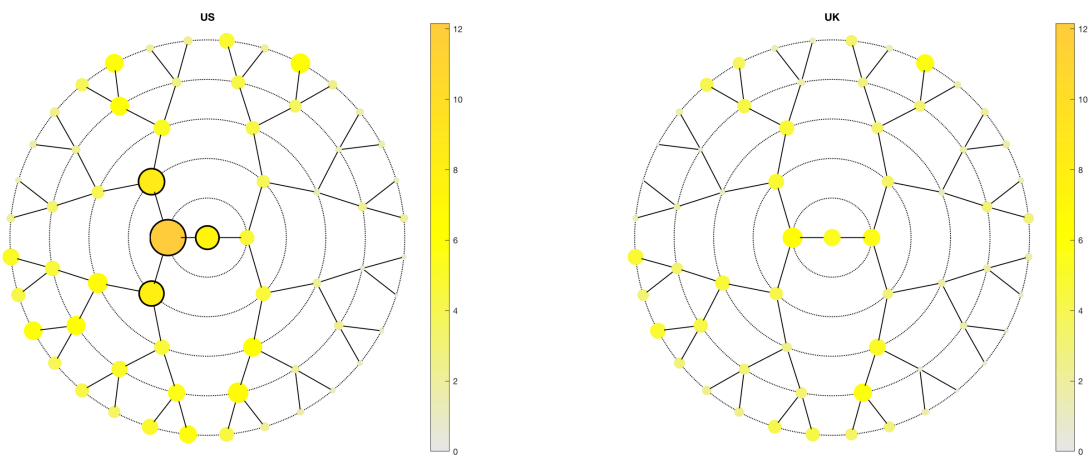

A

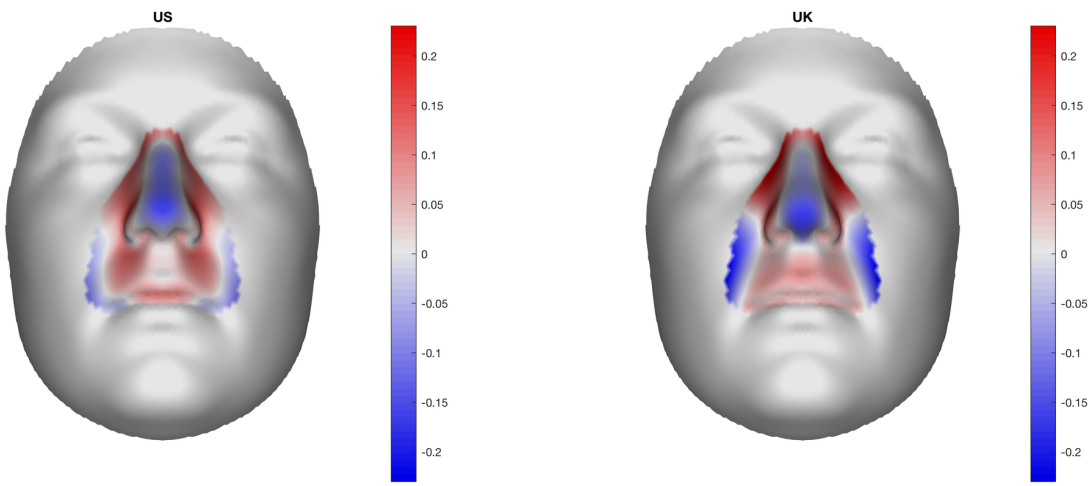

B

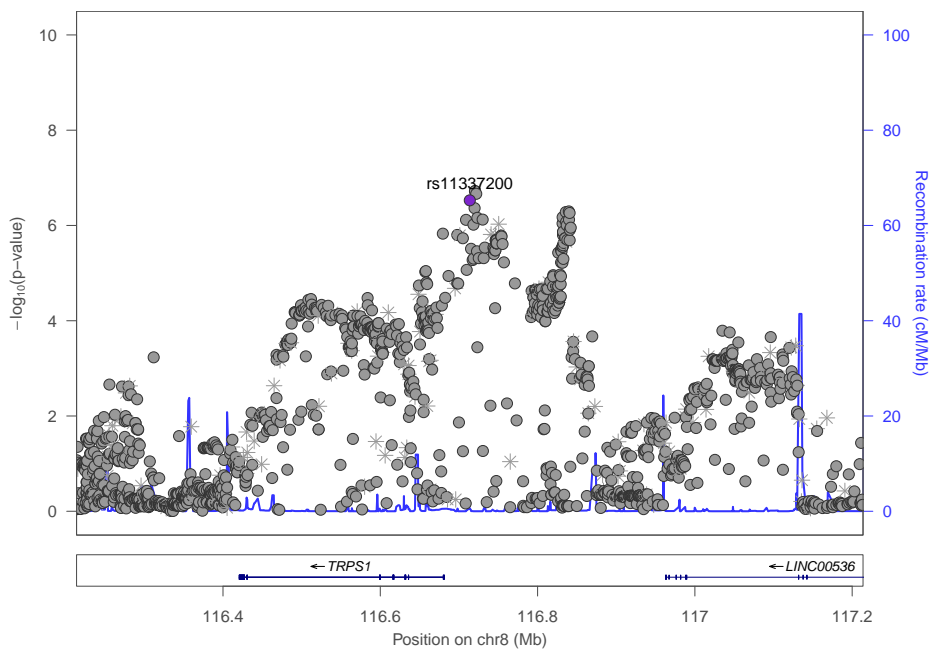

C

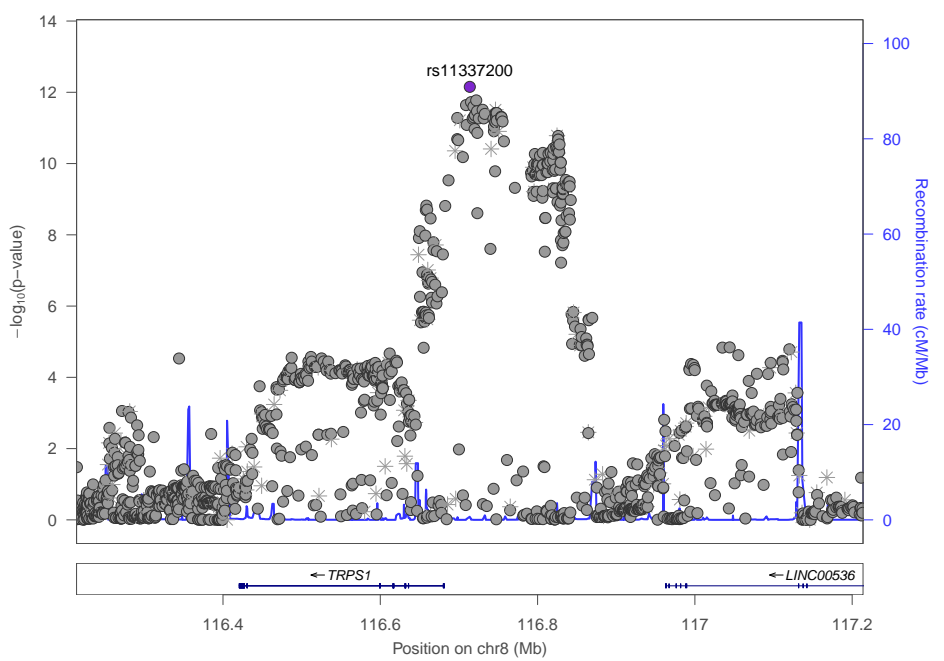

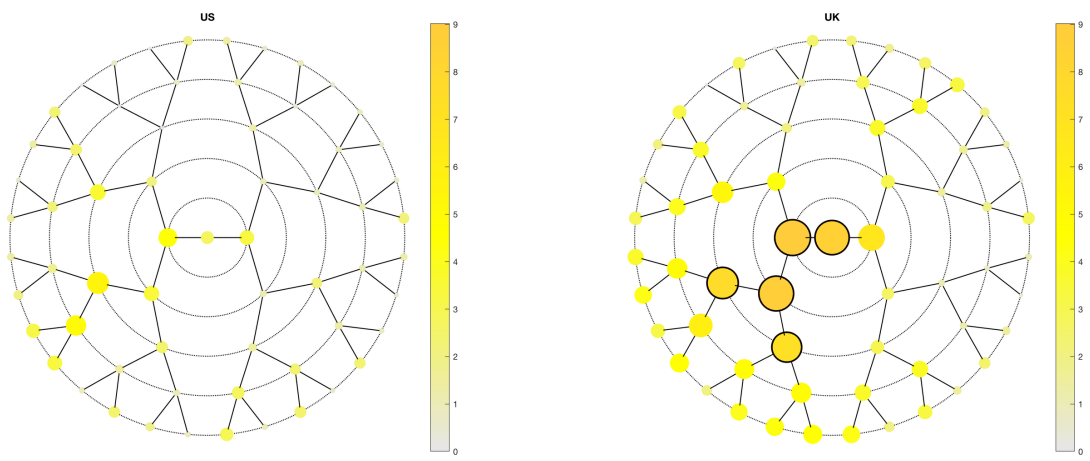

A

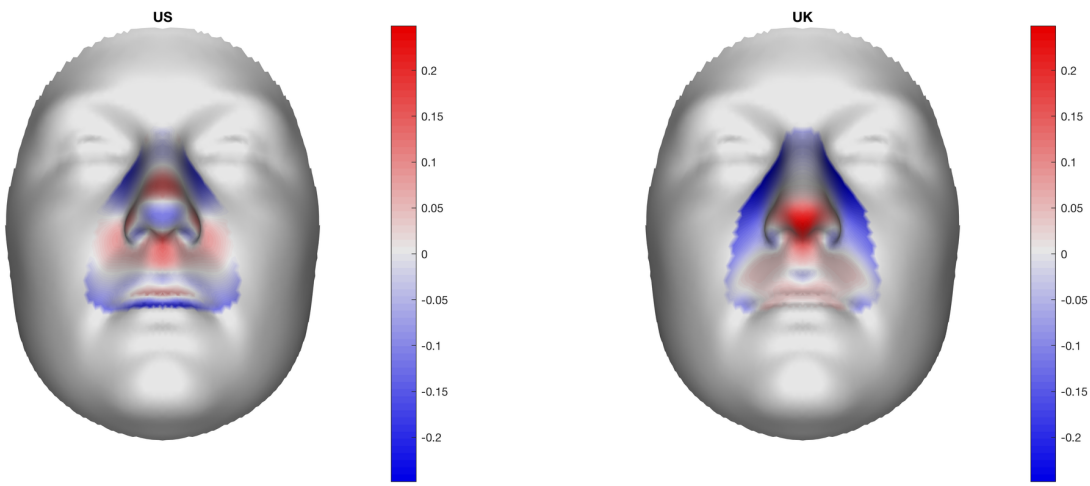

B

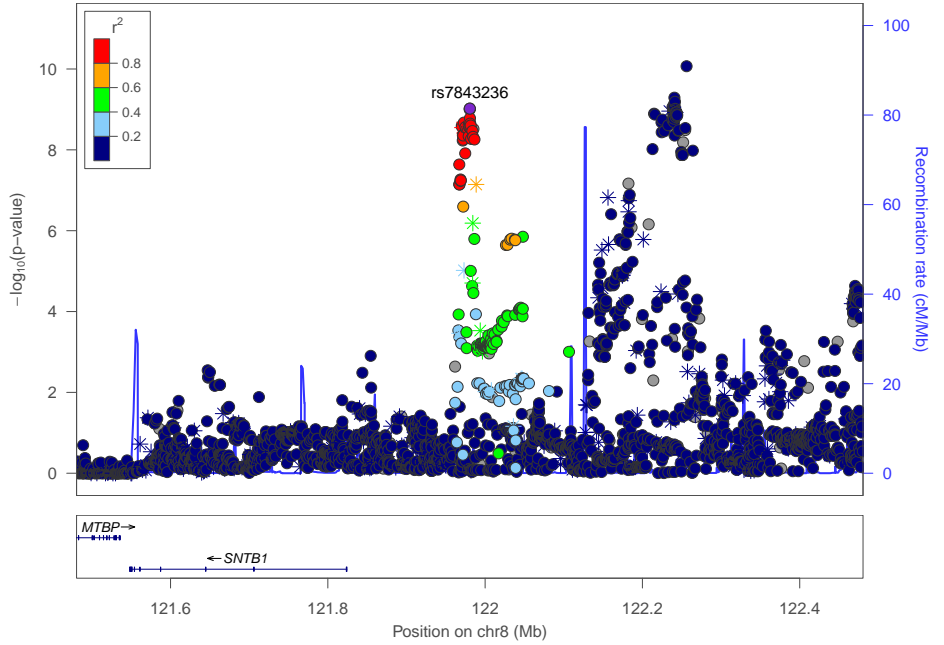

C

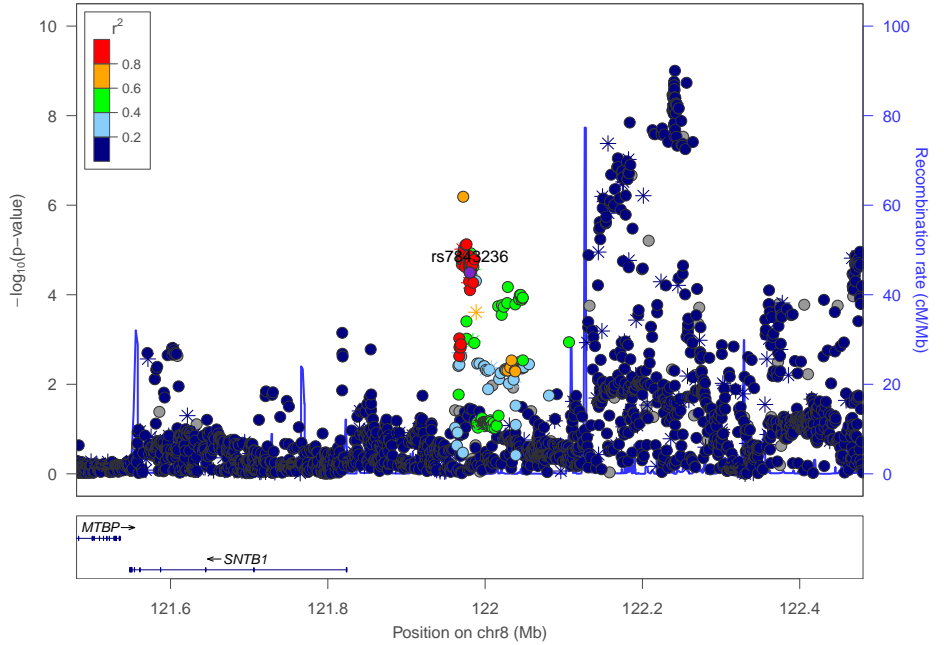

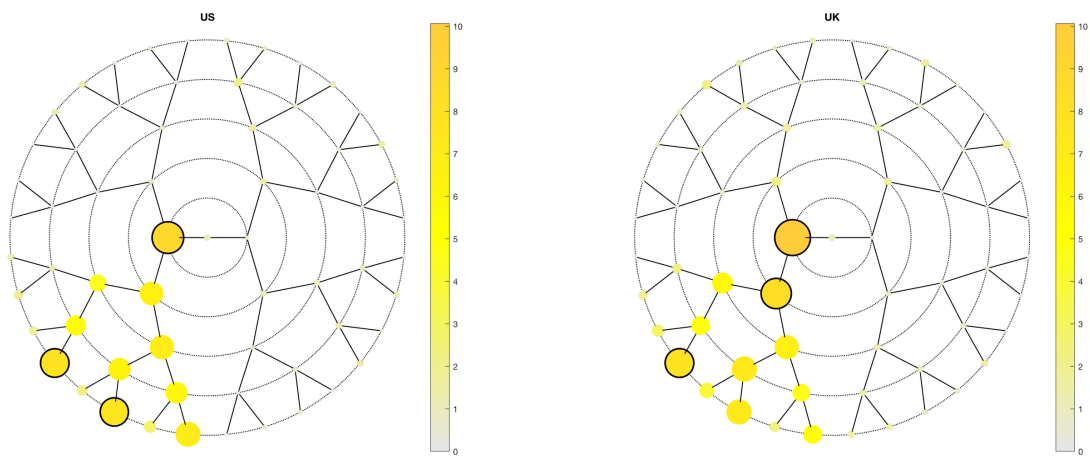

A

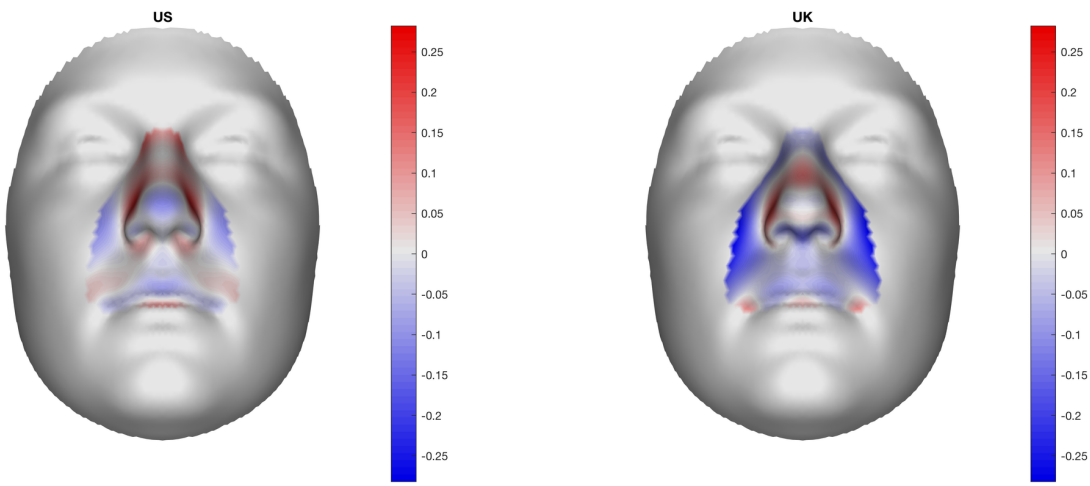

B

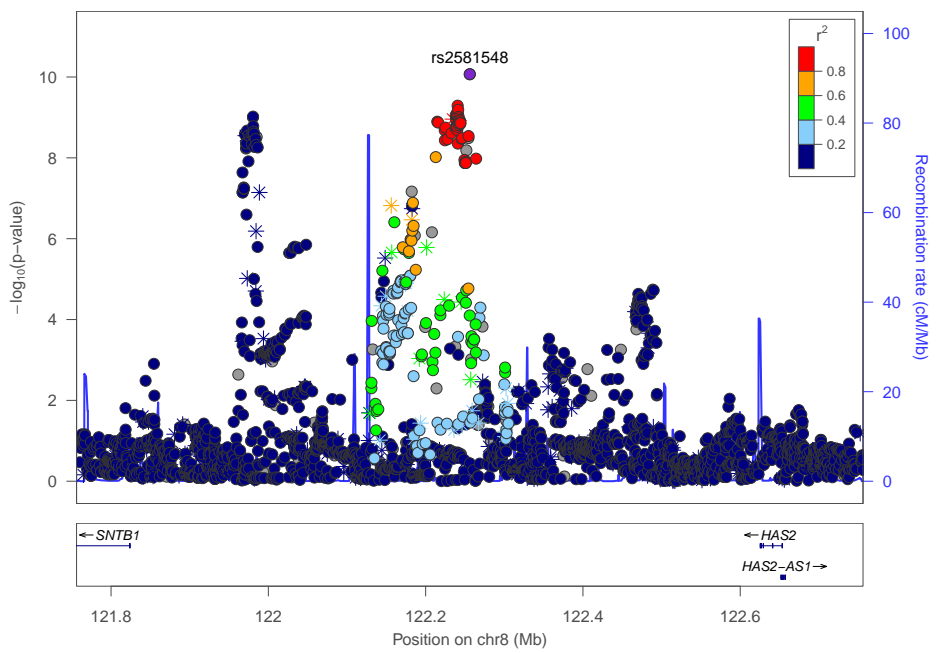

C

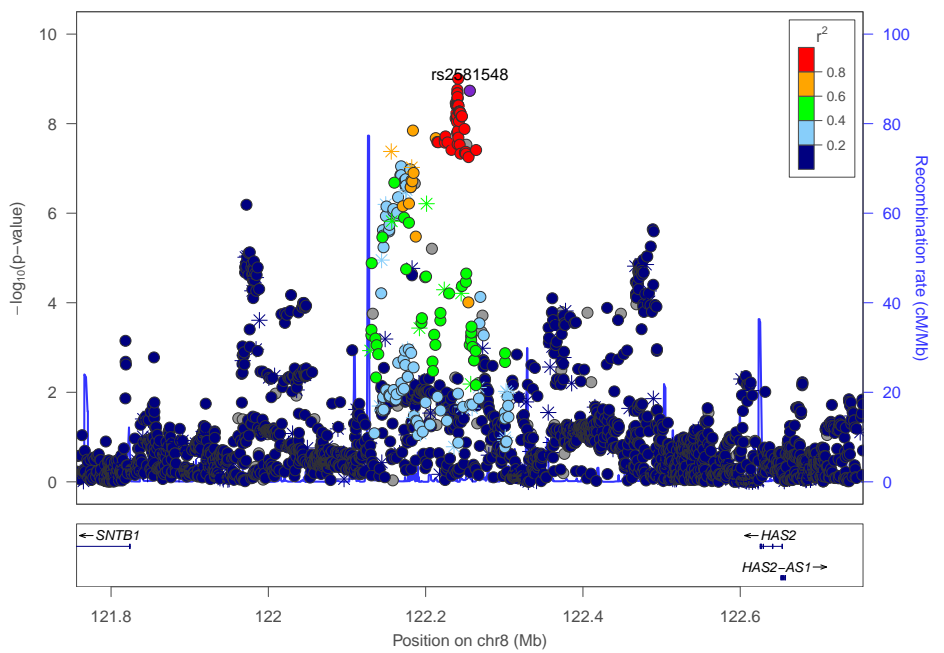



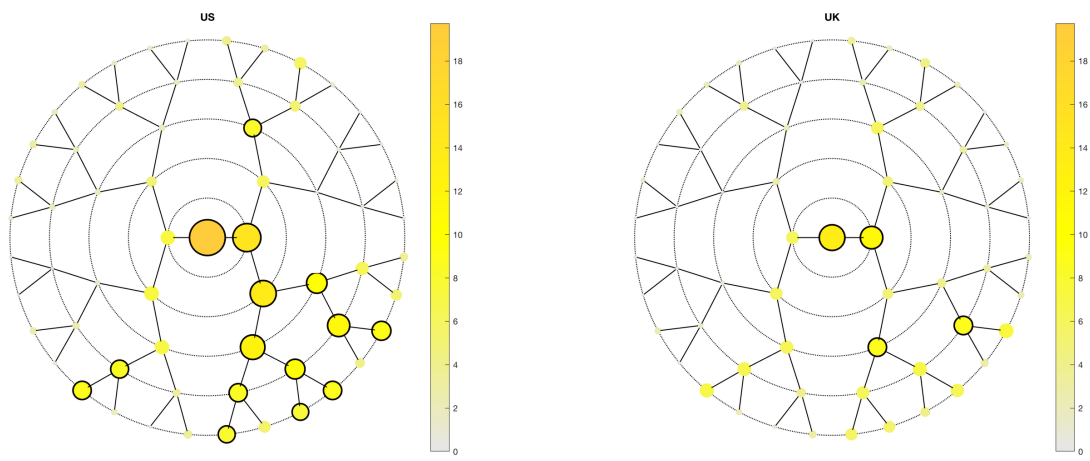

A

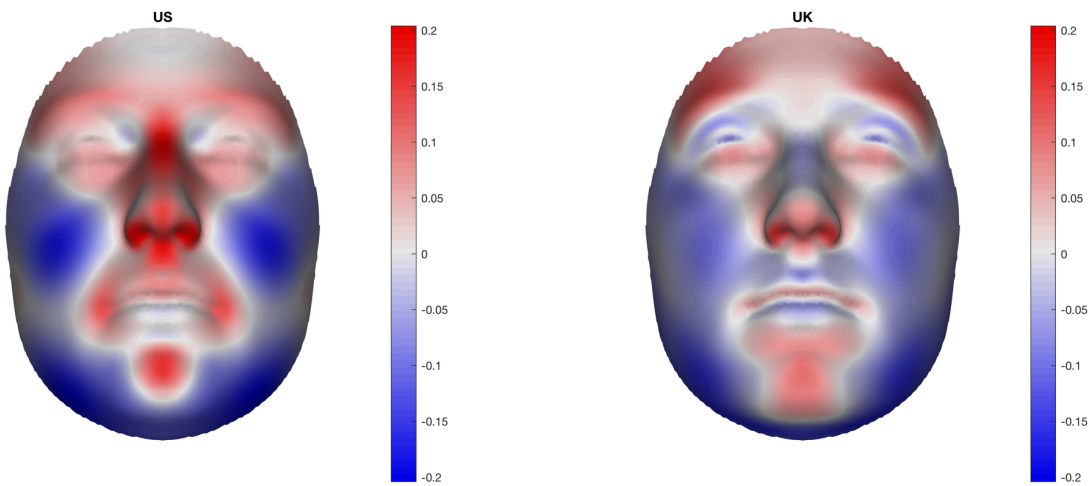

B

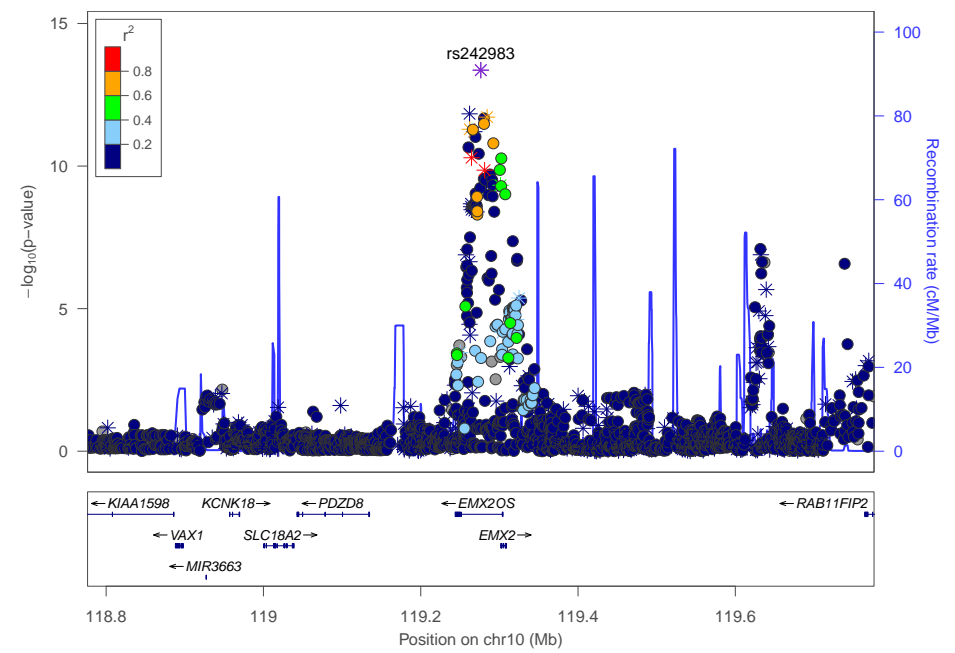

C

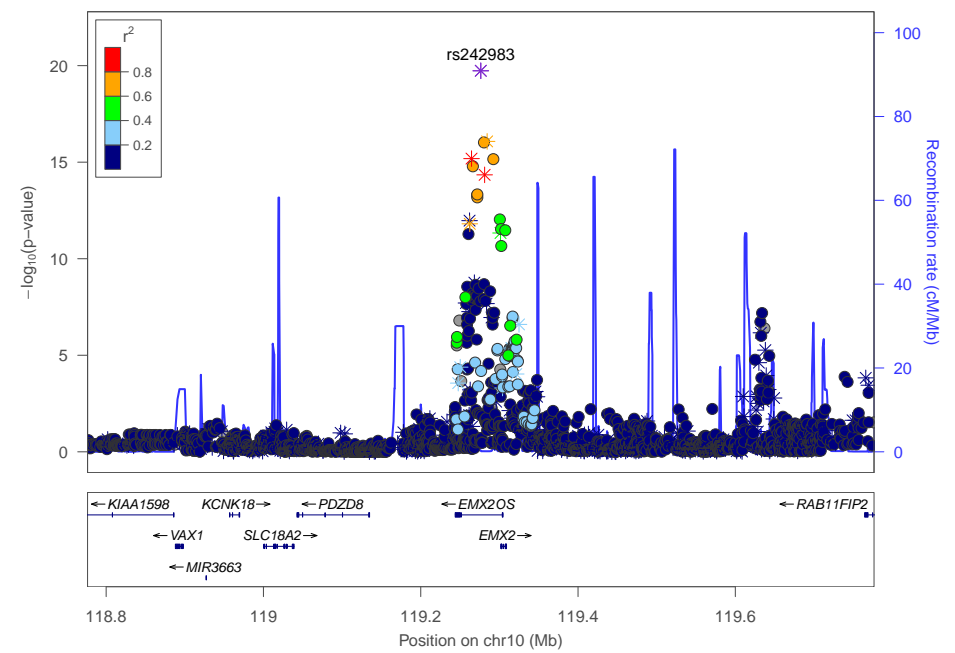

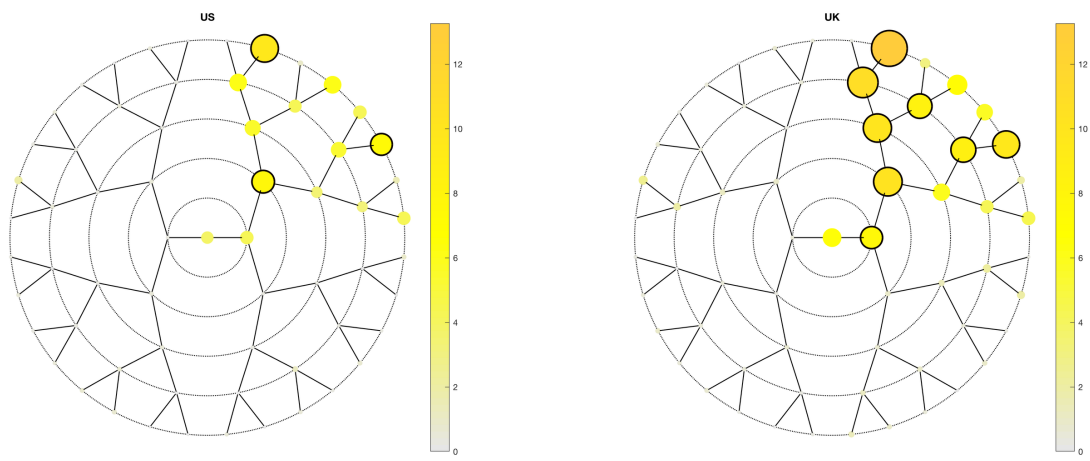

A

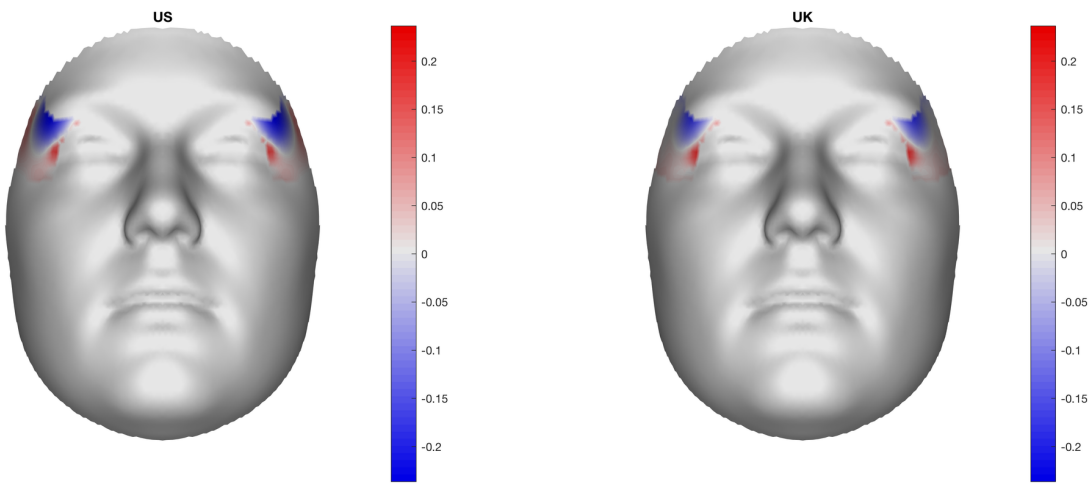

B

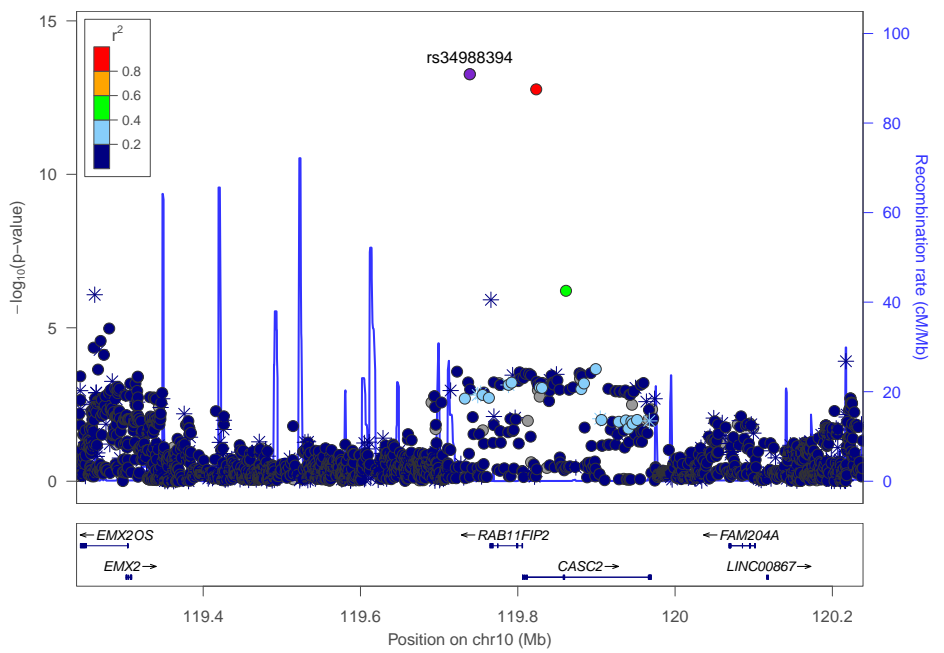

C

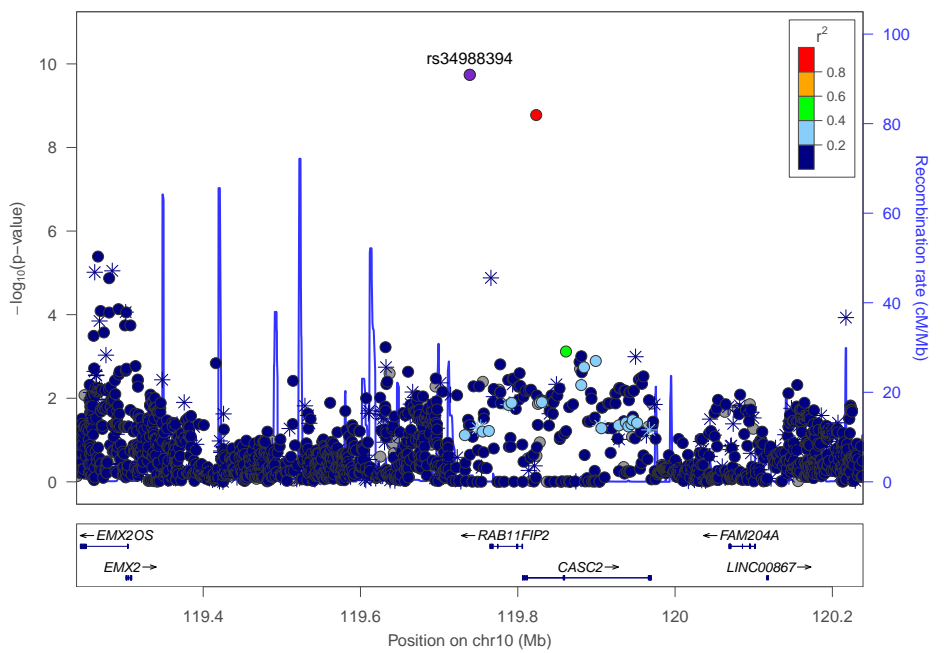

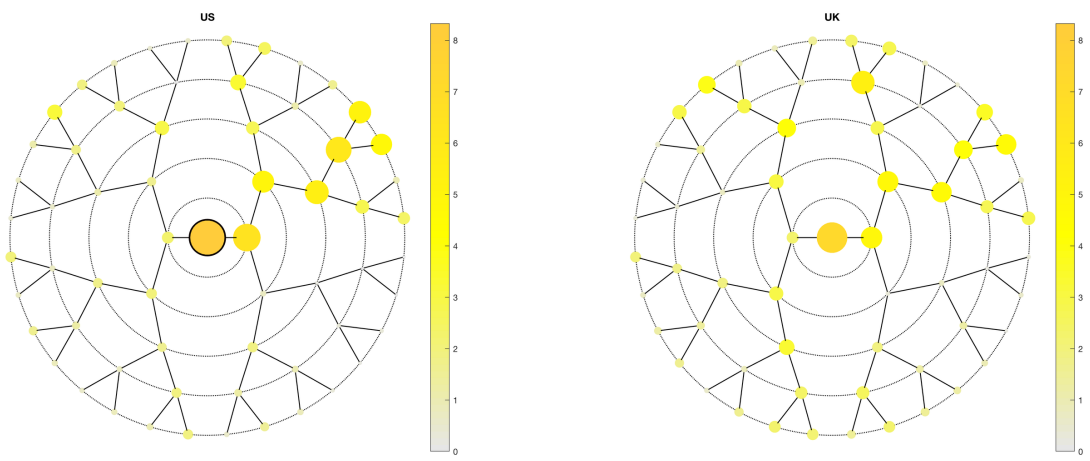

A

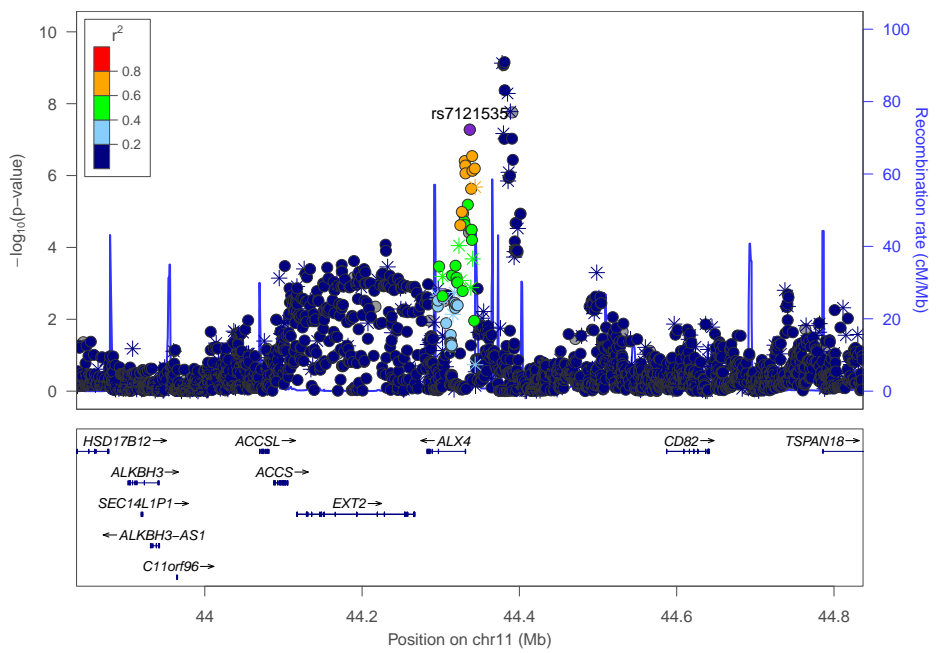

C

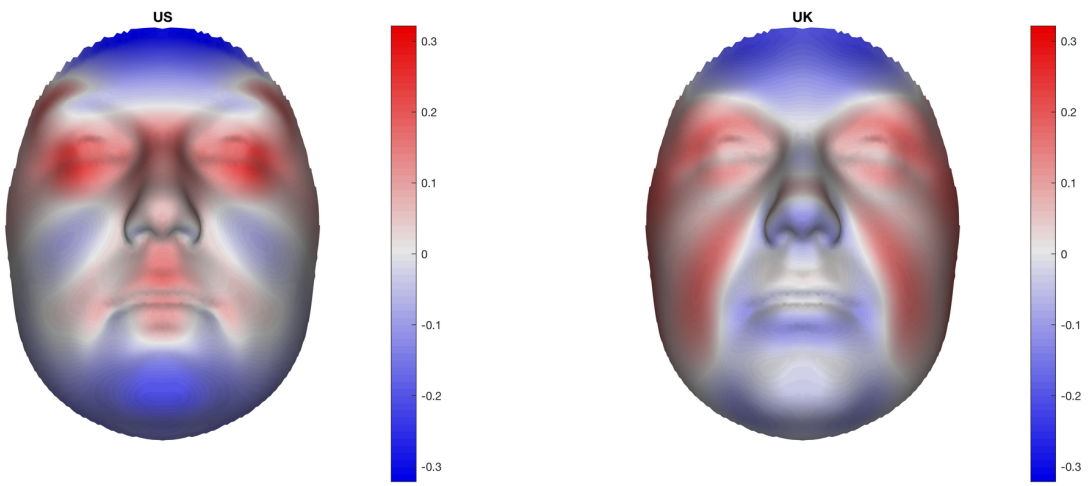

B

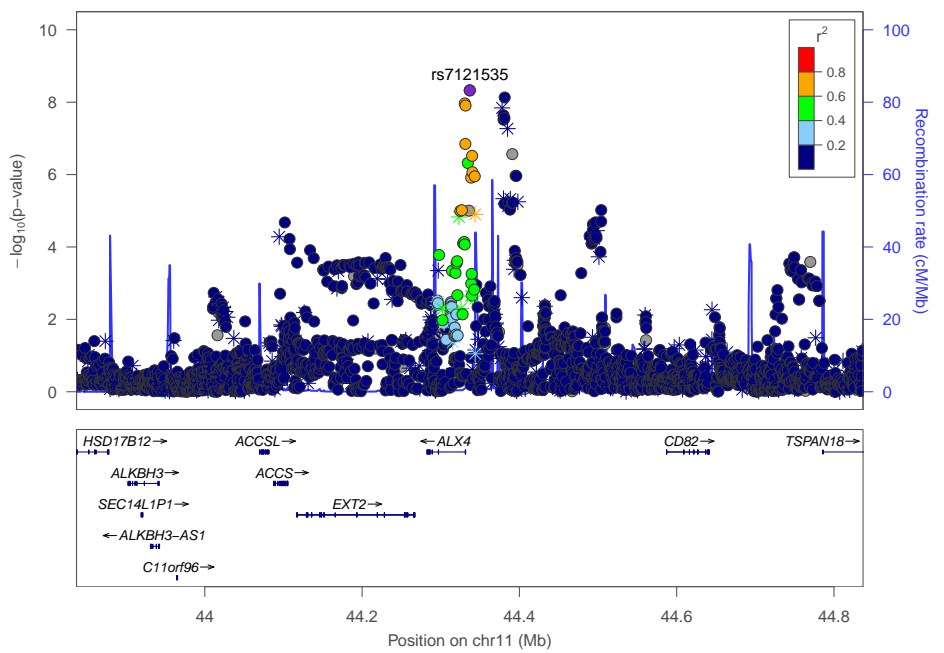



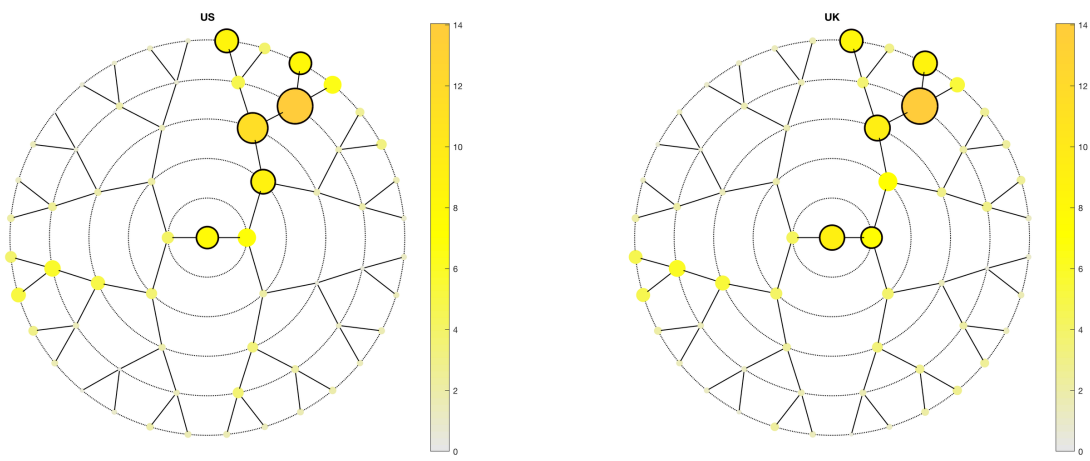

A

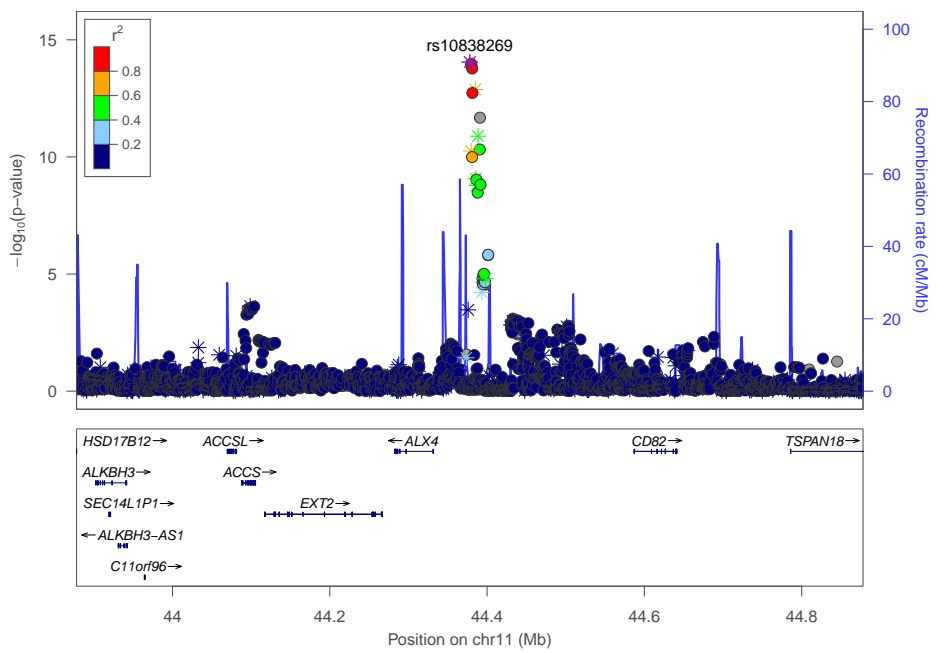

C

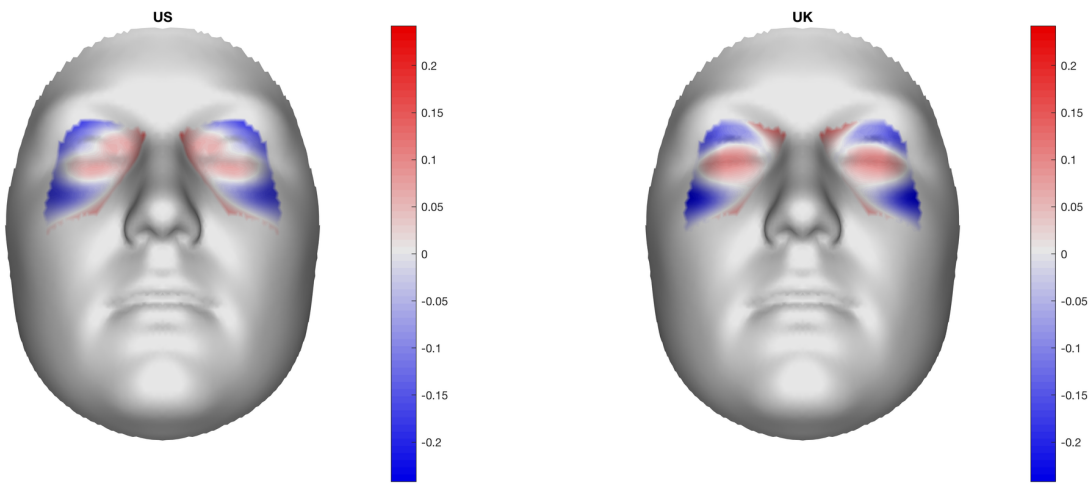

B

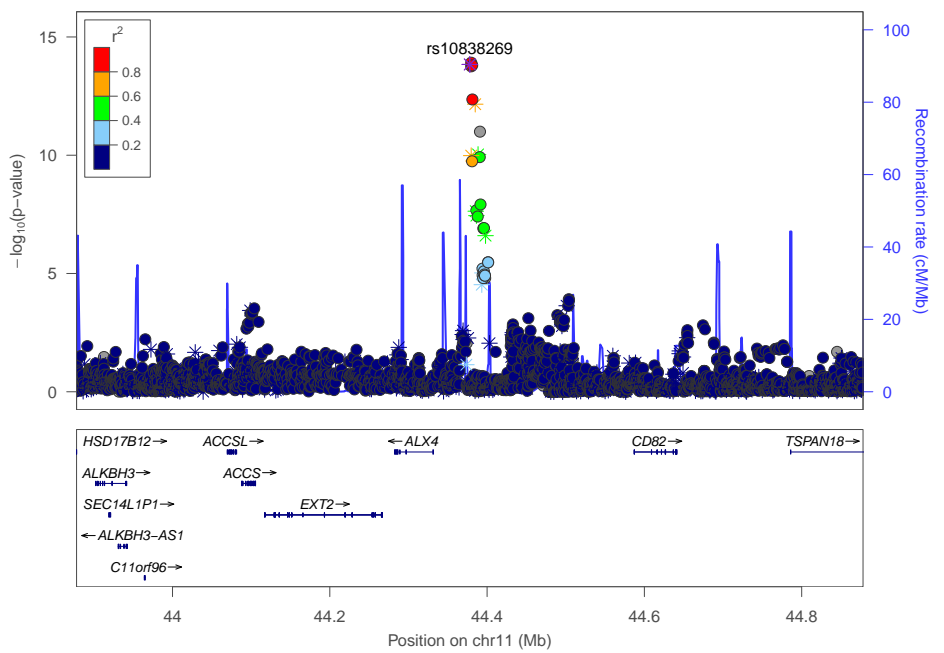

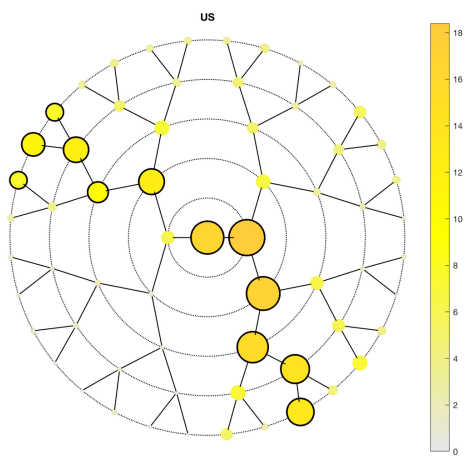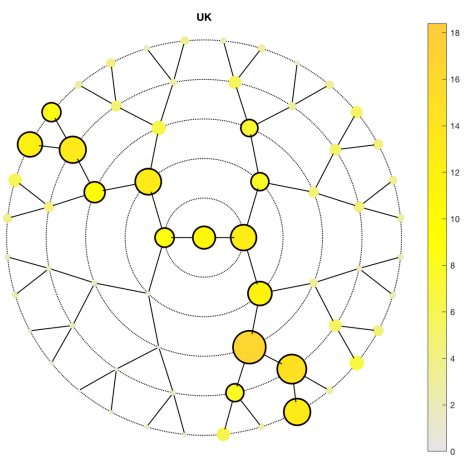

A

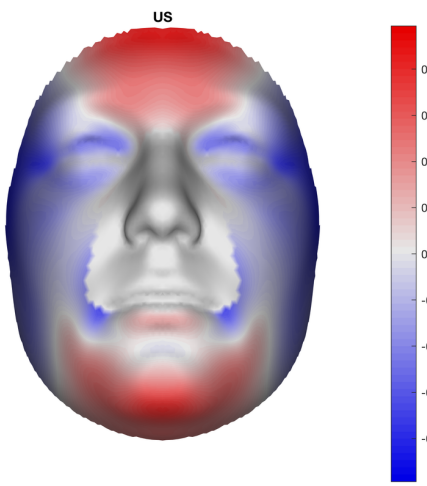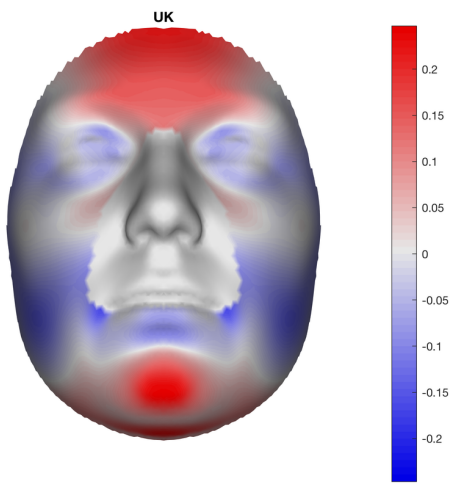

B

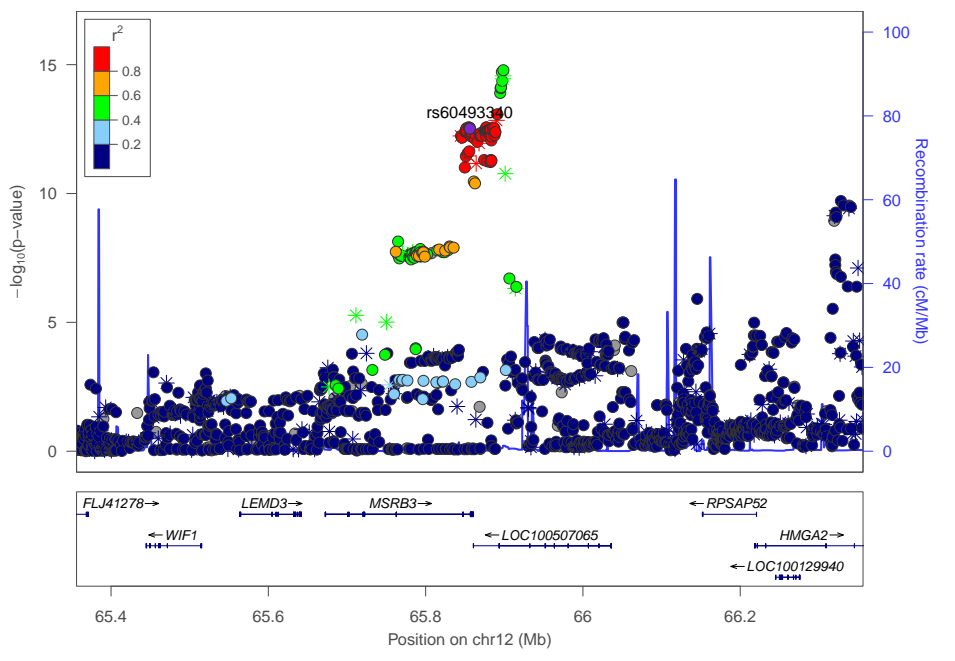

C

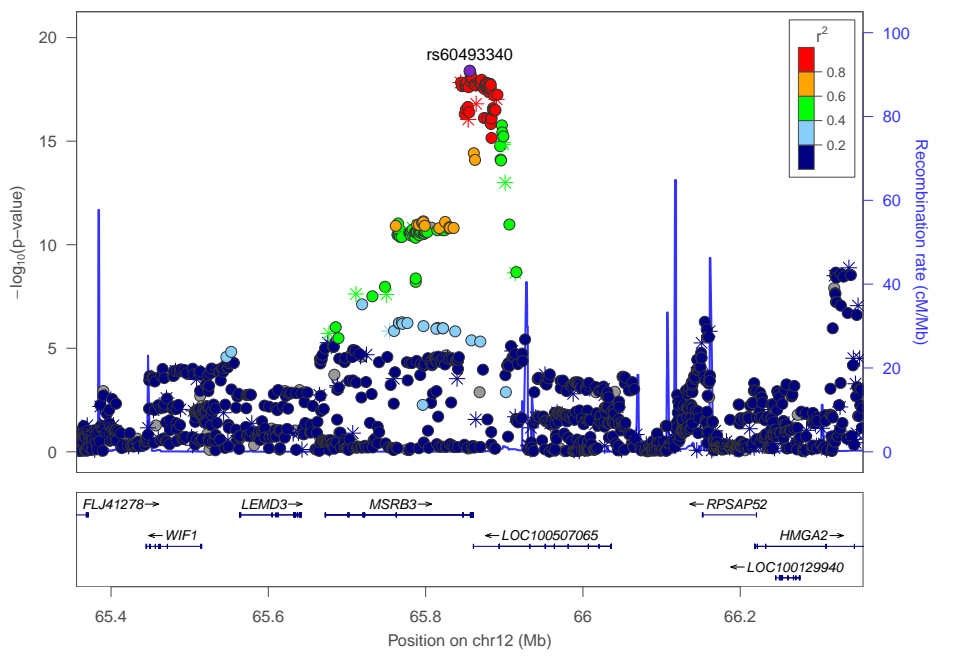

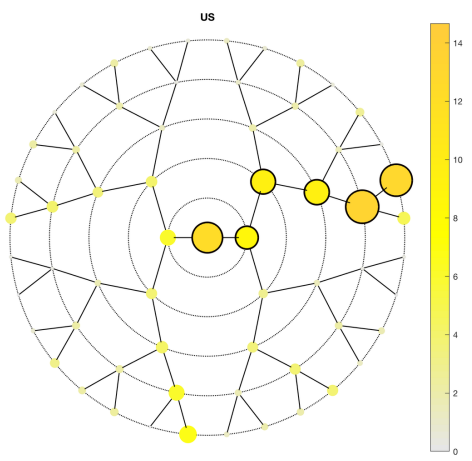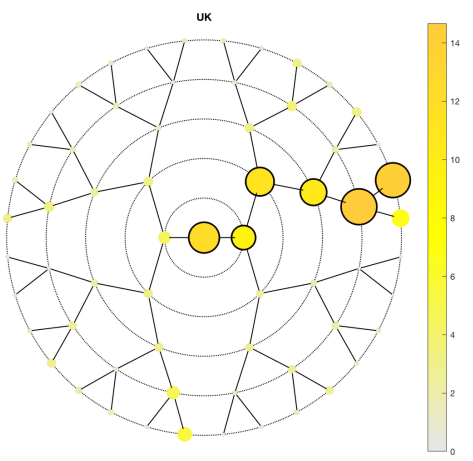

A

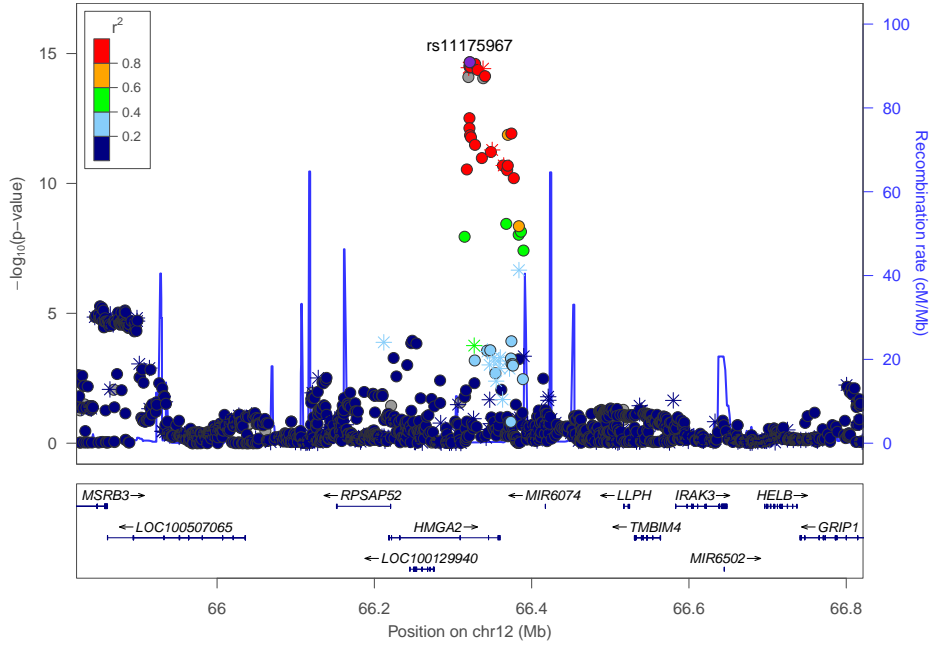

C

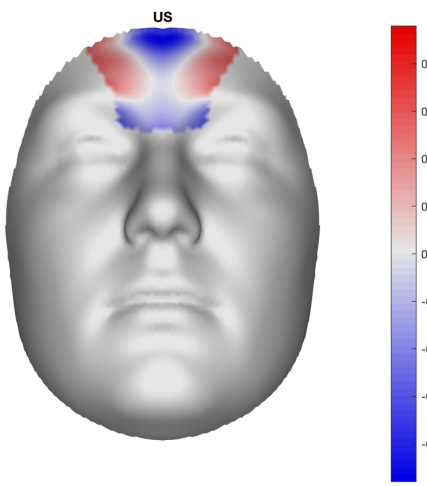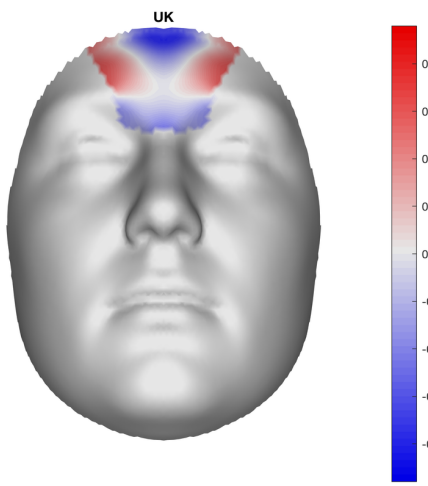

B

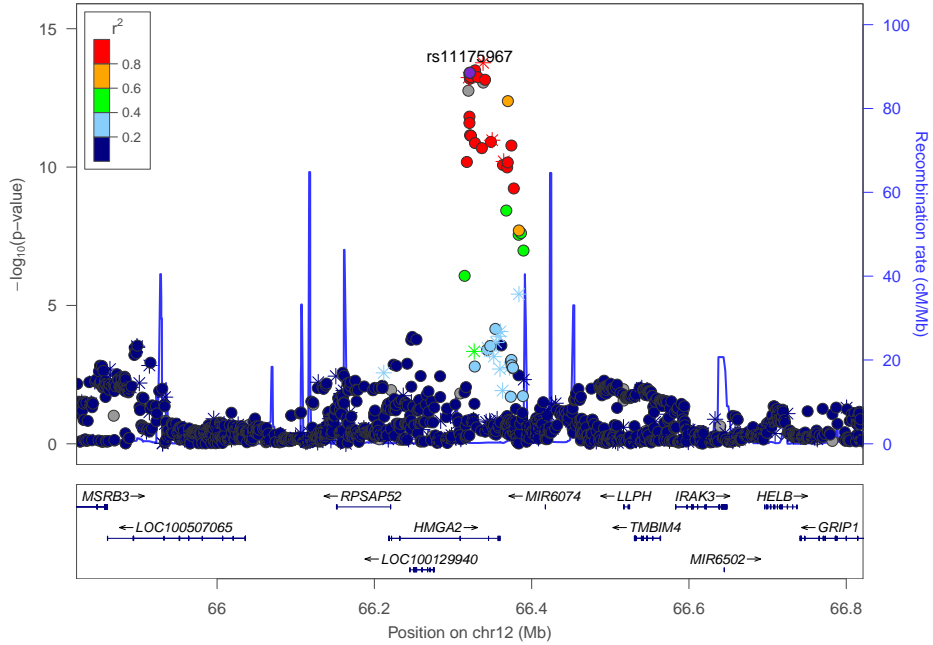

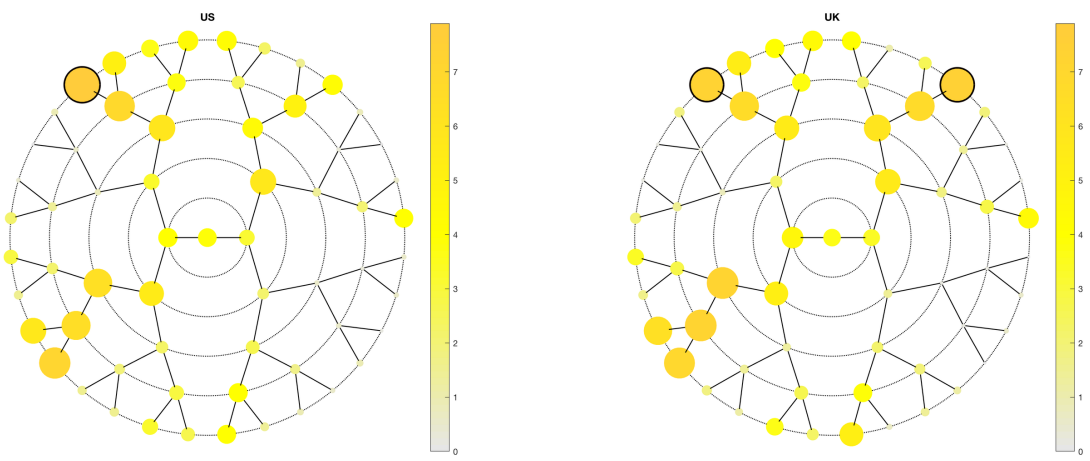

A

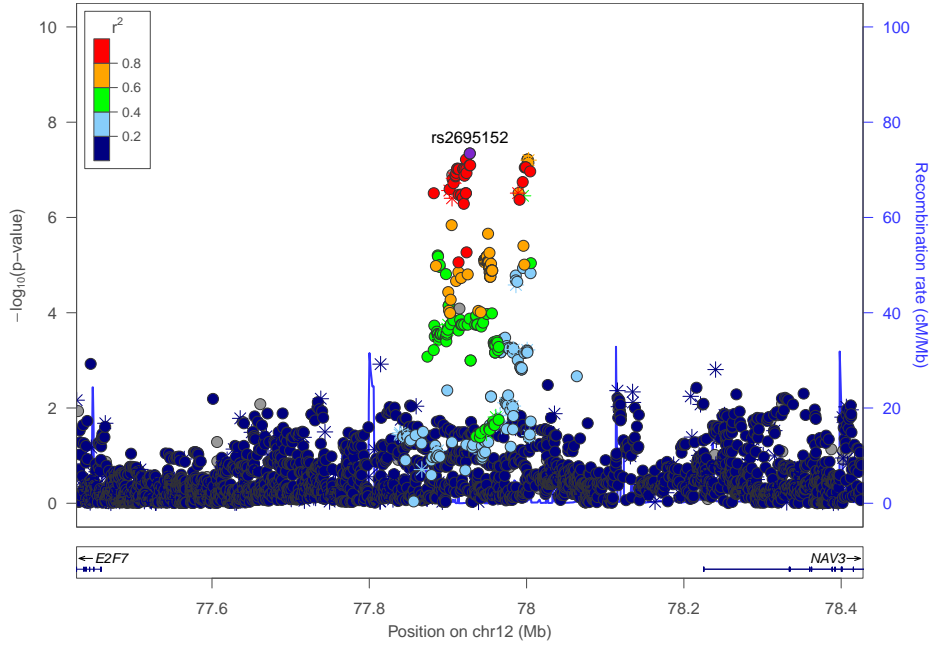

C

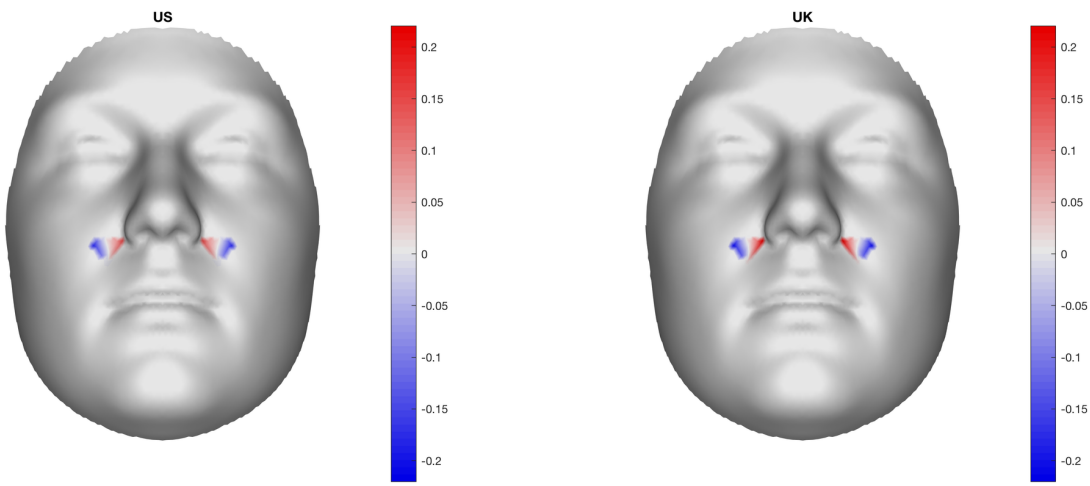

B

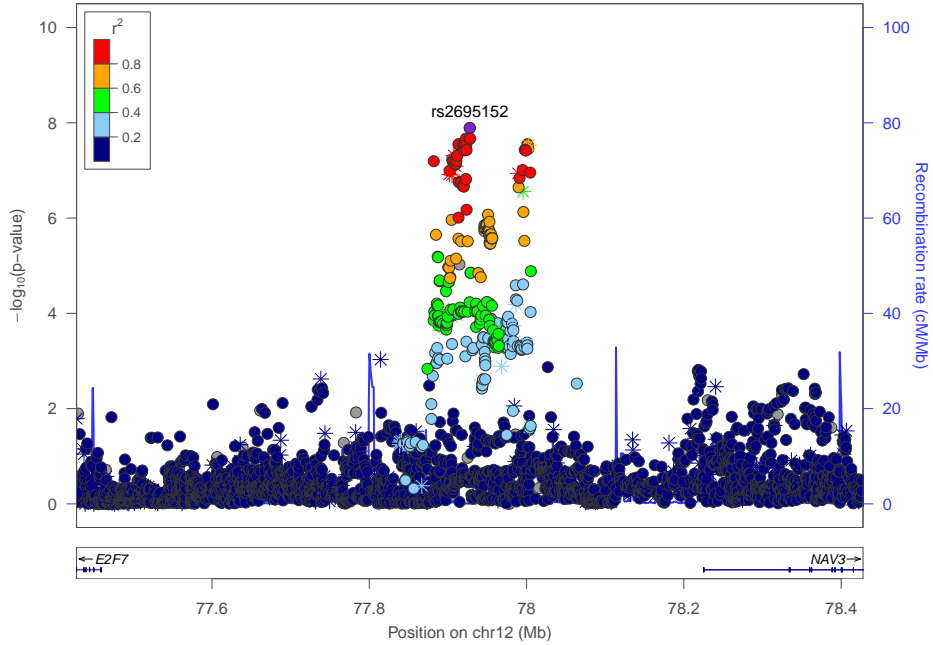

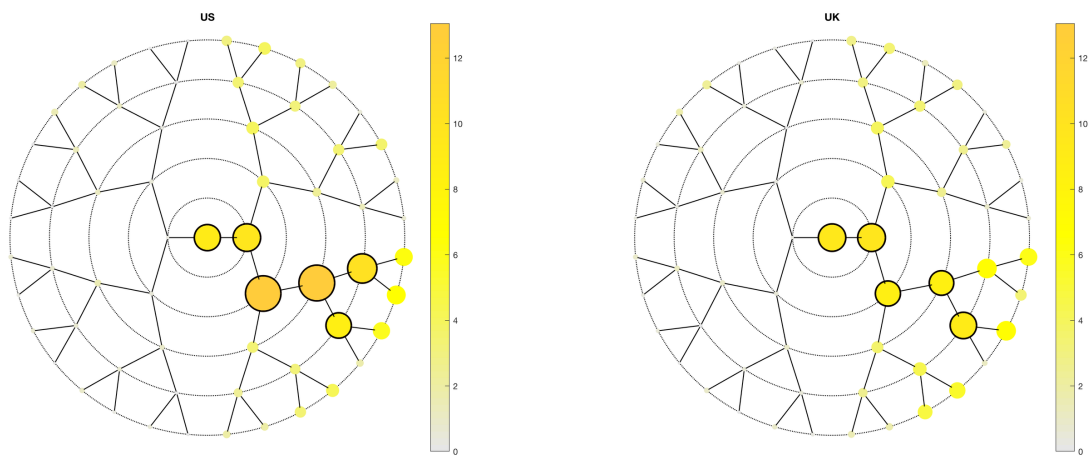

A

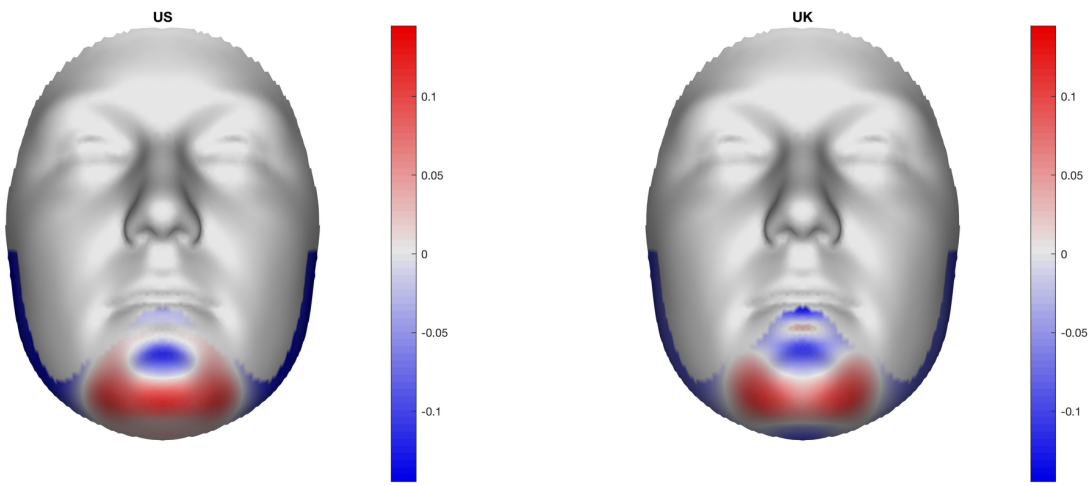

B

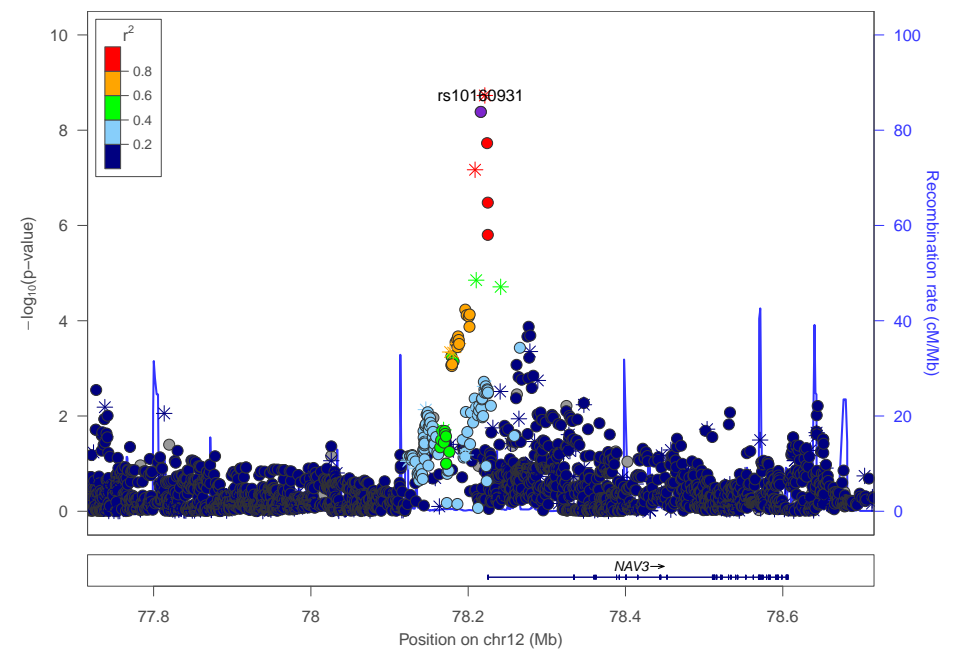

C

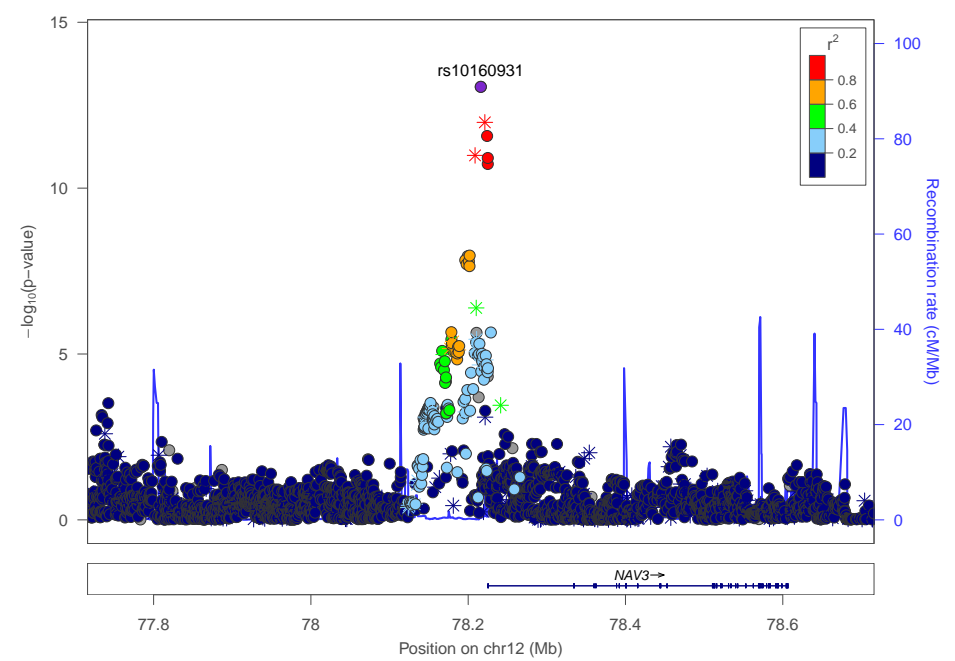



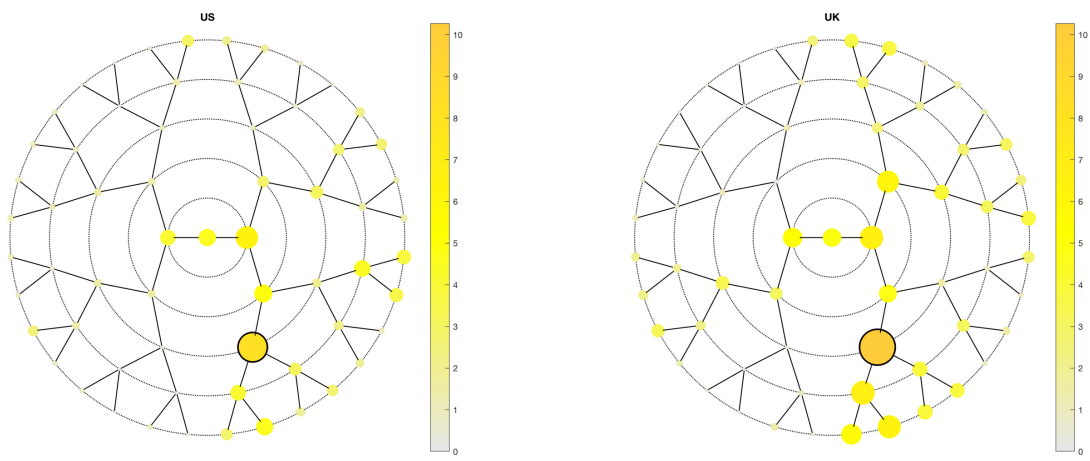

A

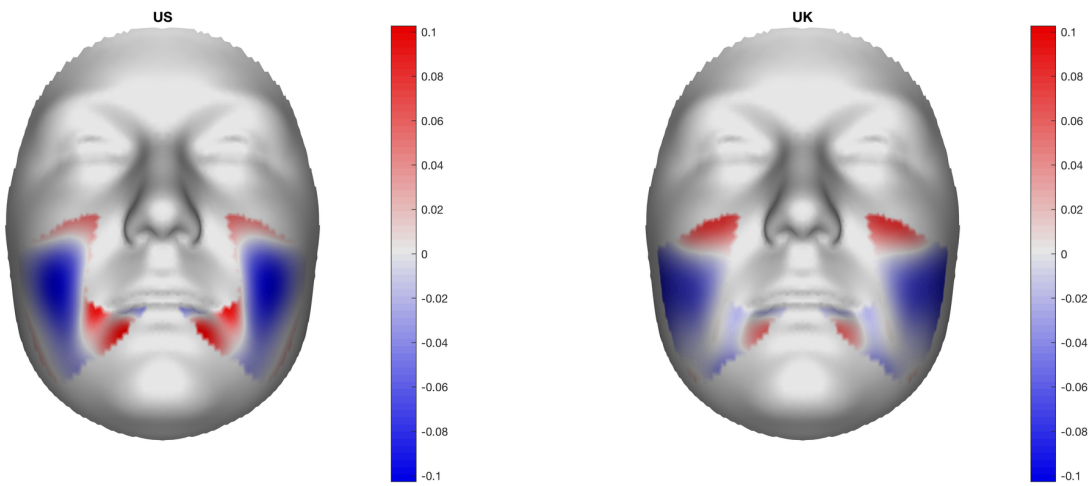

B

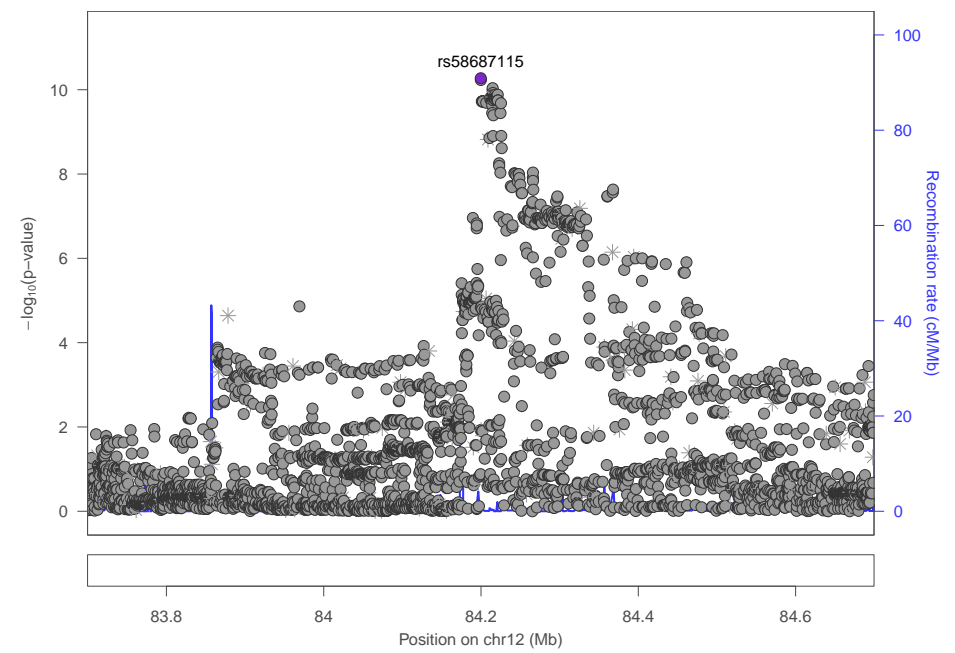

C

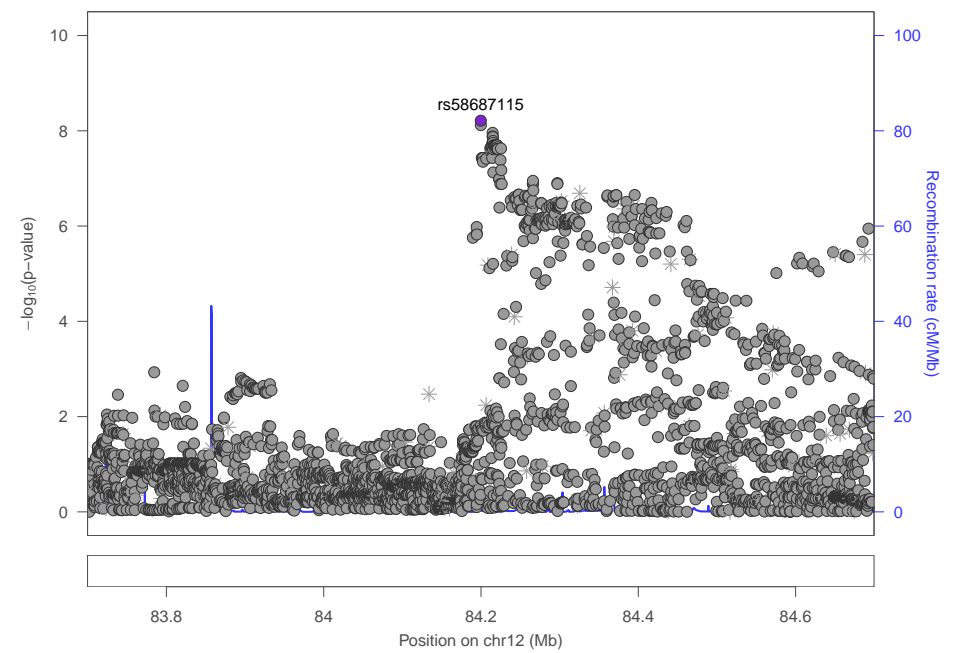



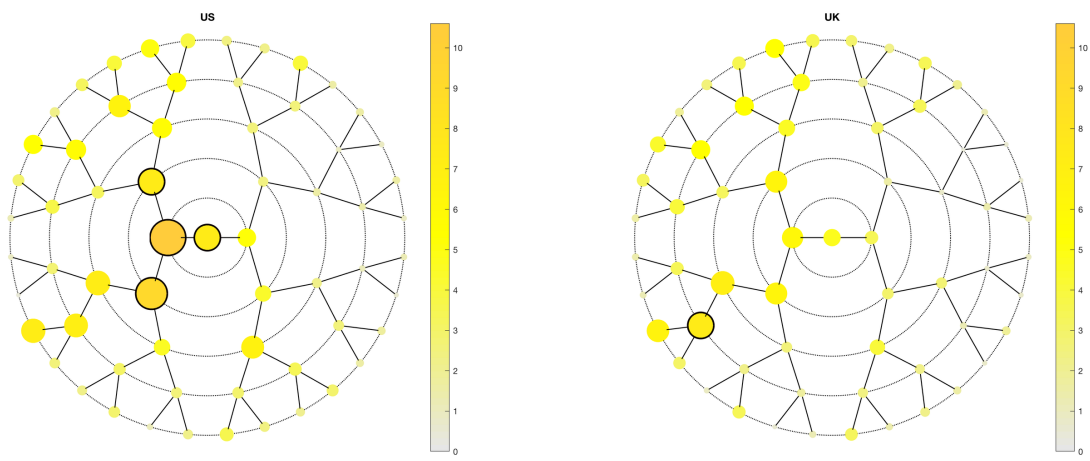

A

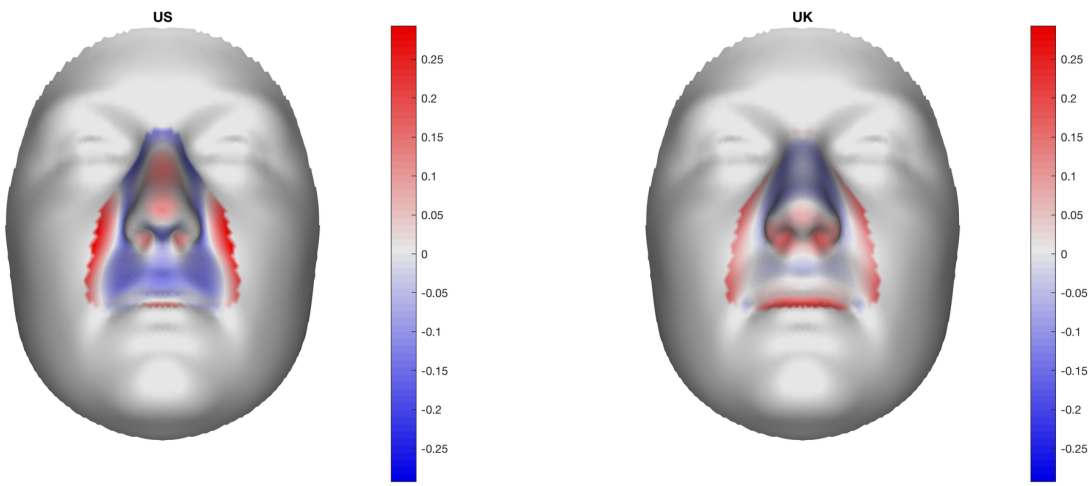

B

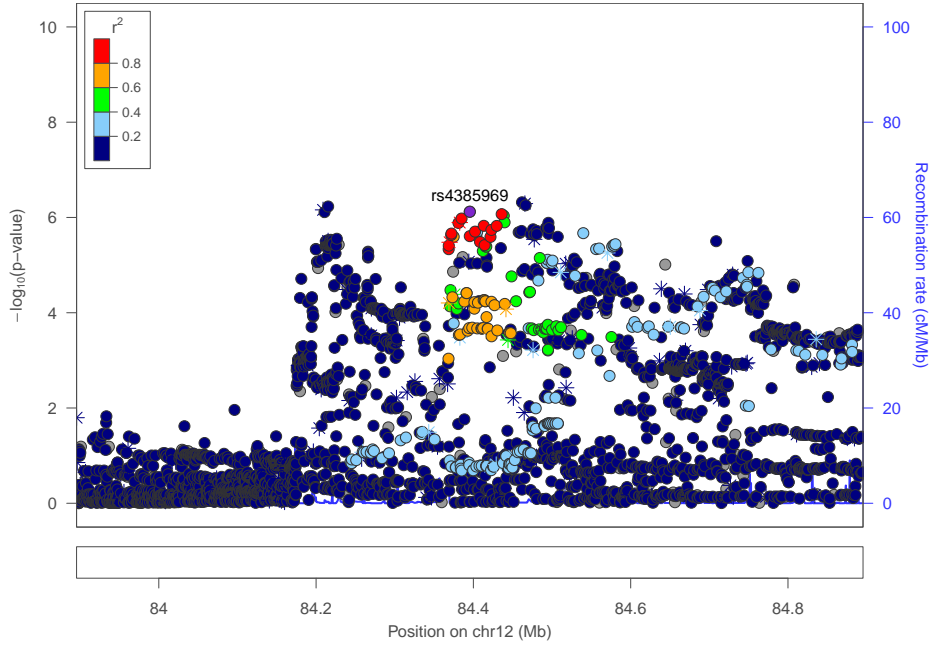

C

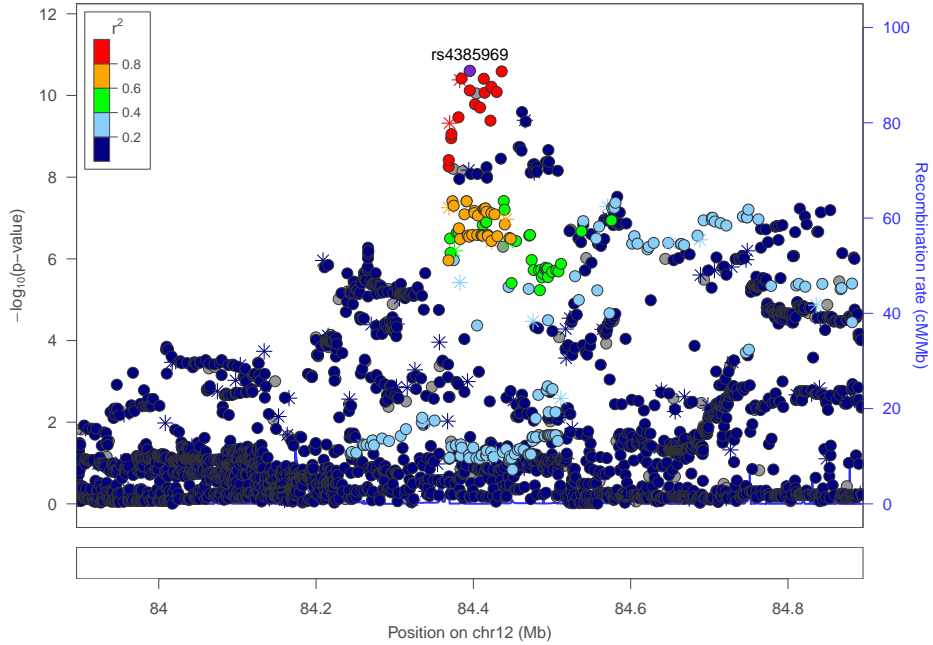

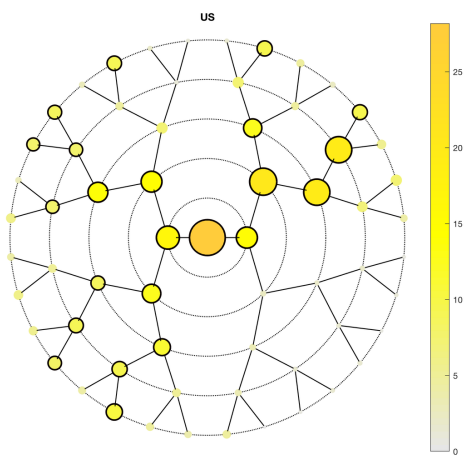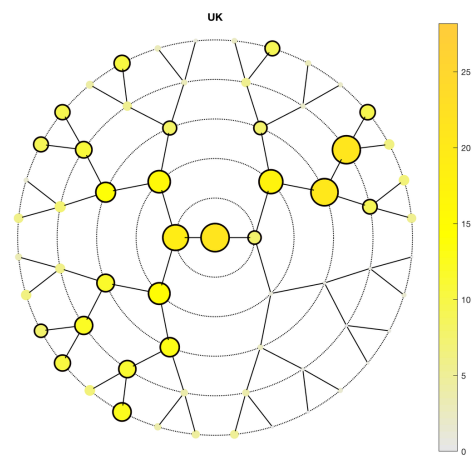

A

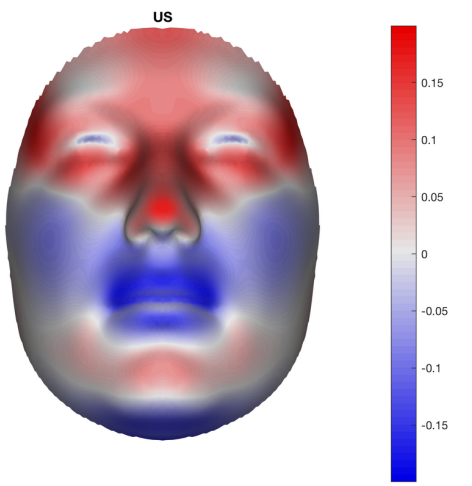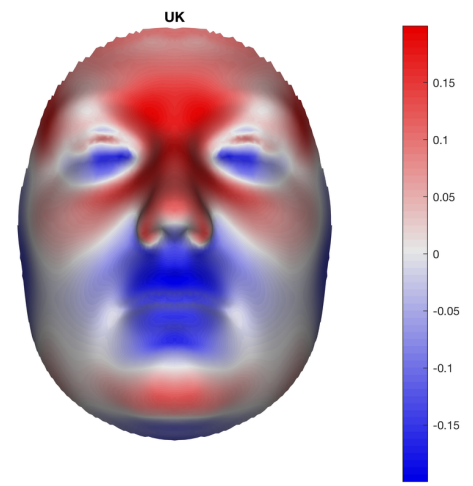

B

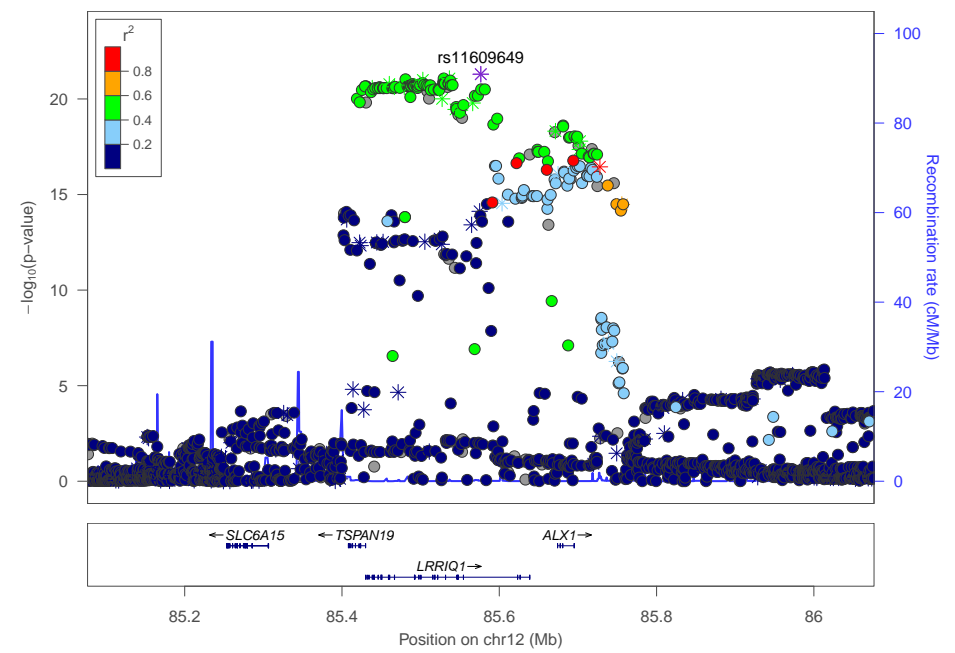

C

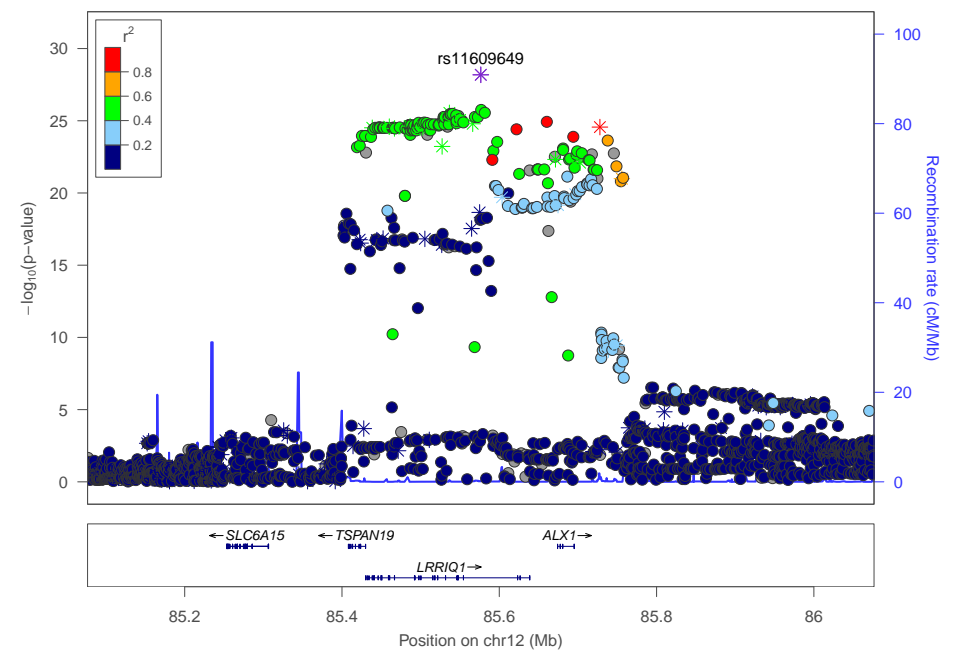

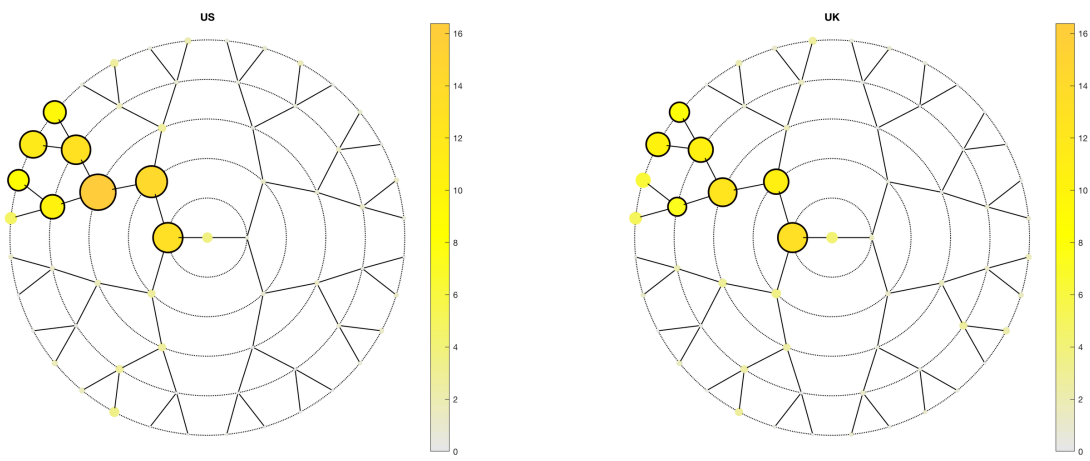

A

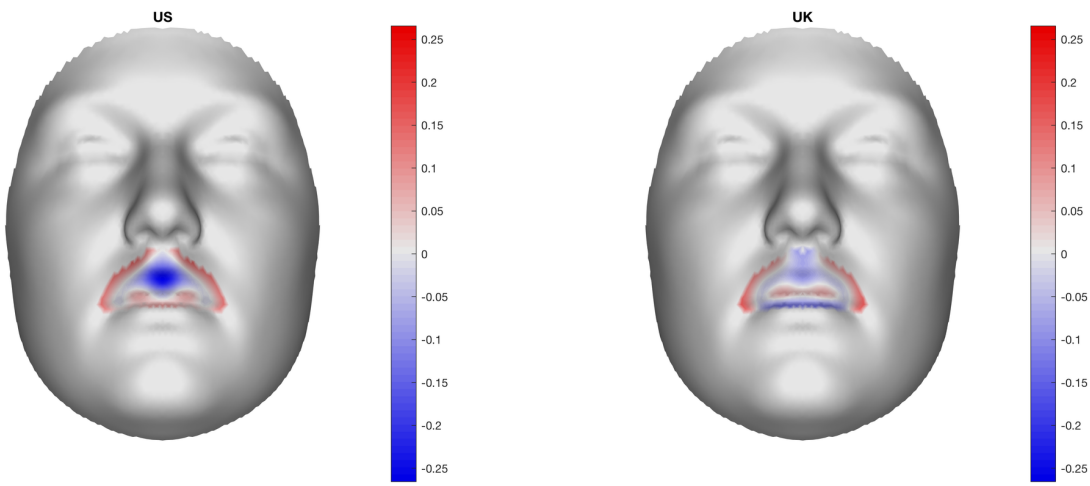

B

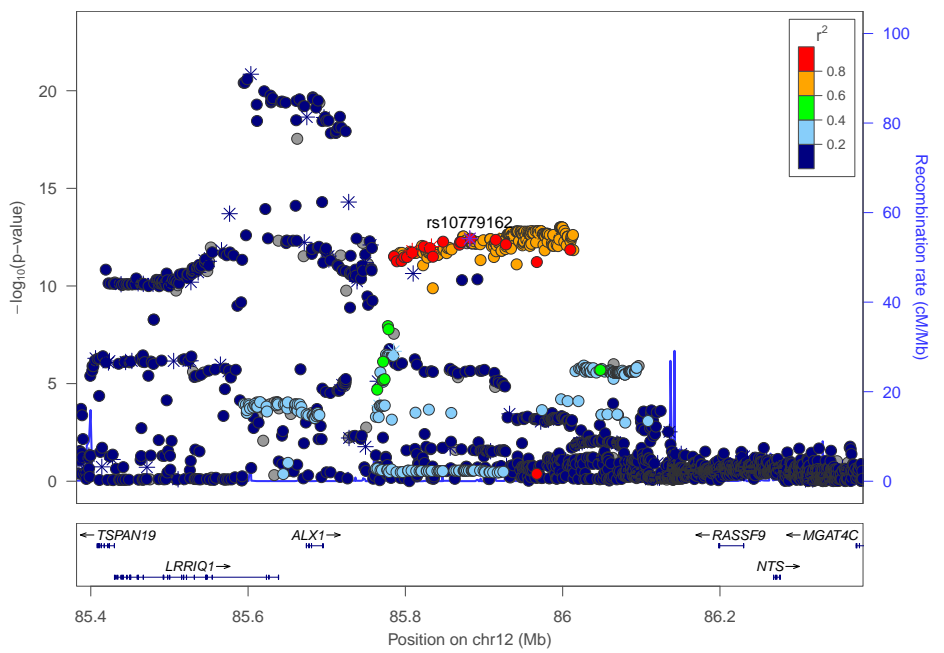

C

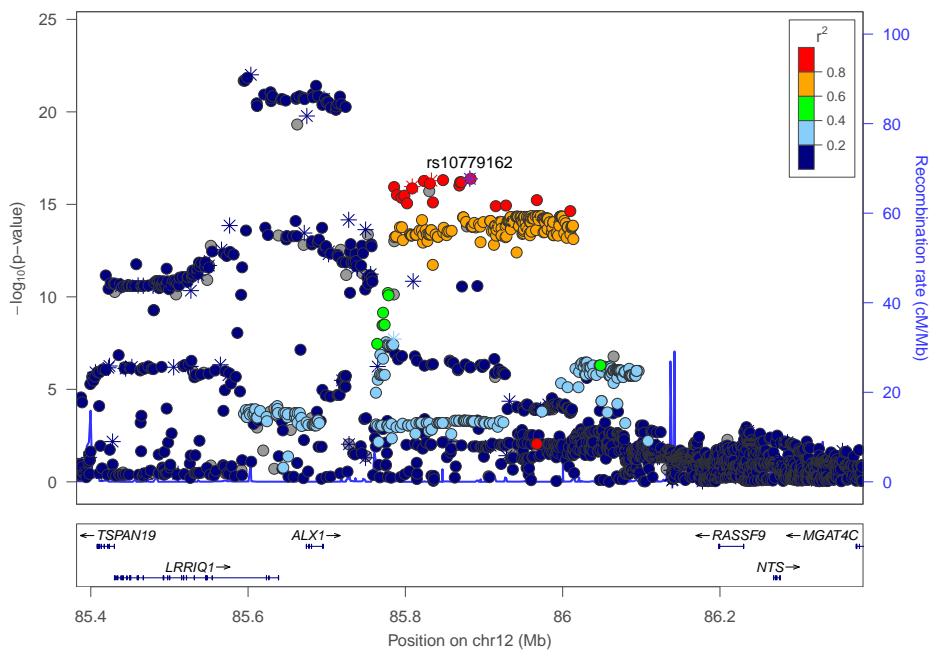

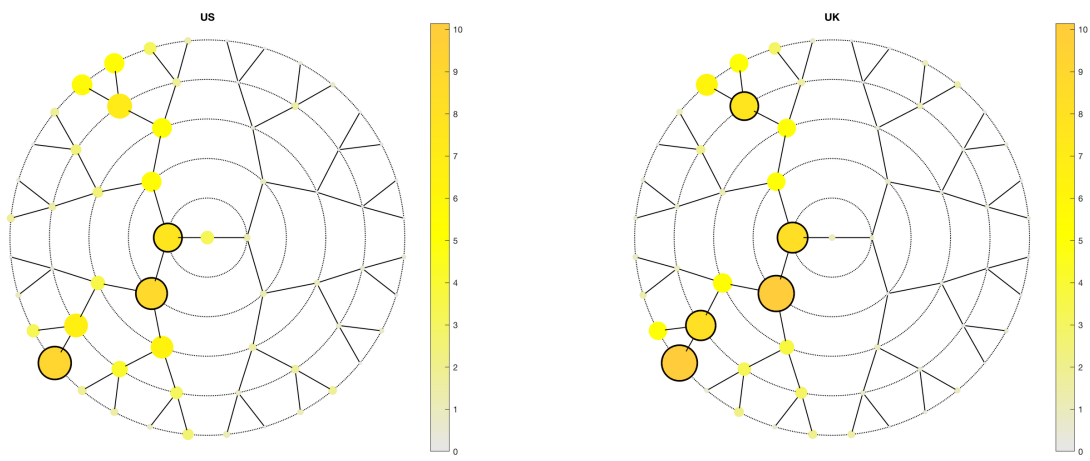

A

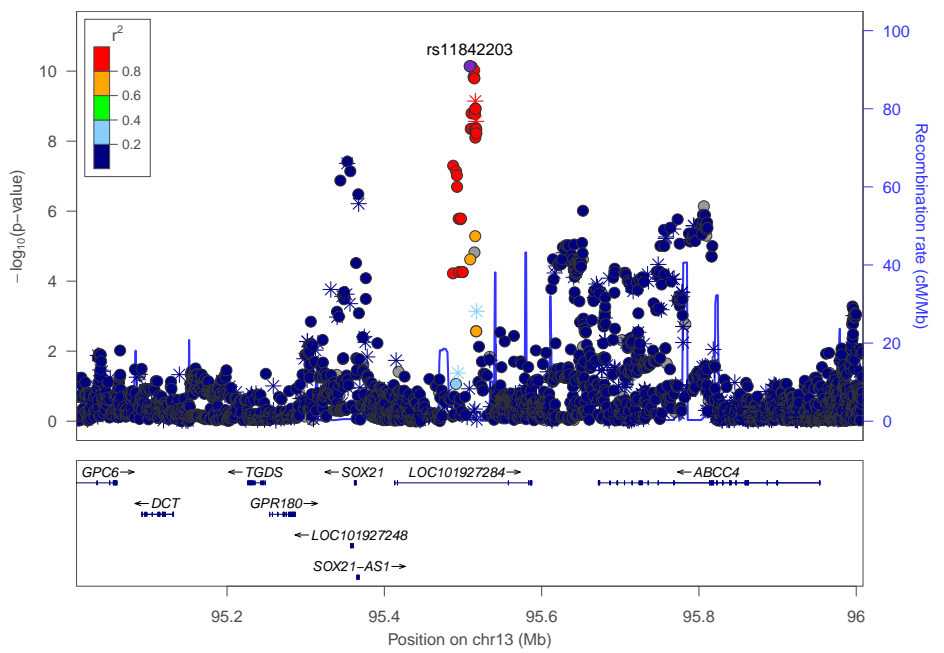

C

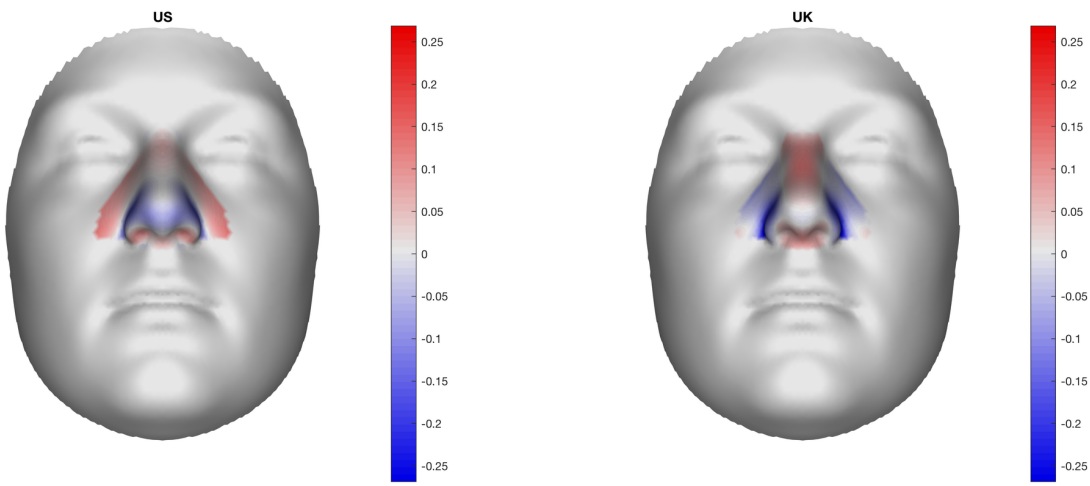

B

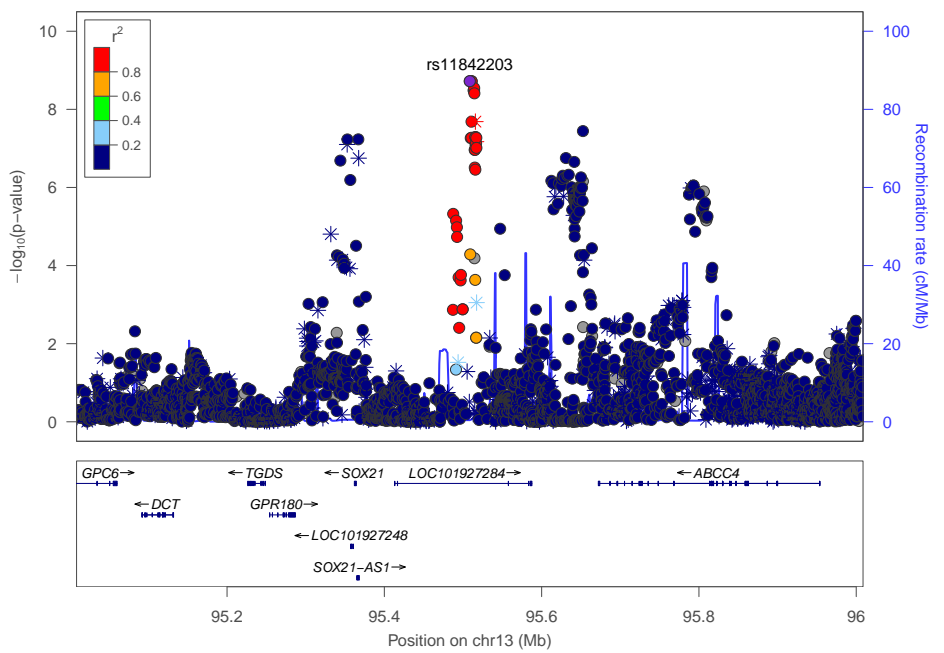

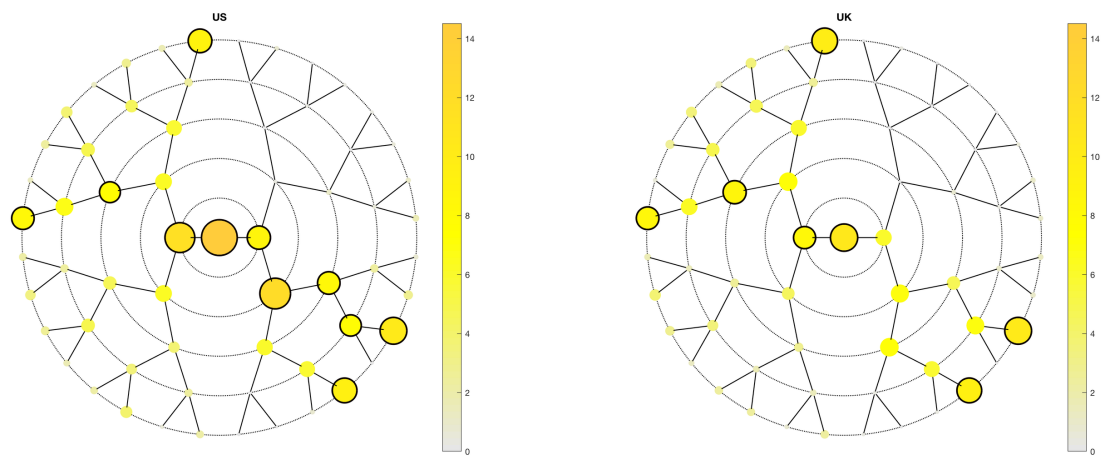

A

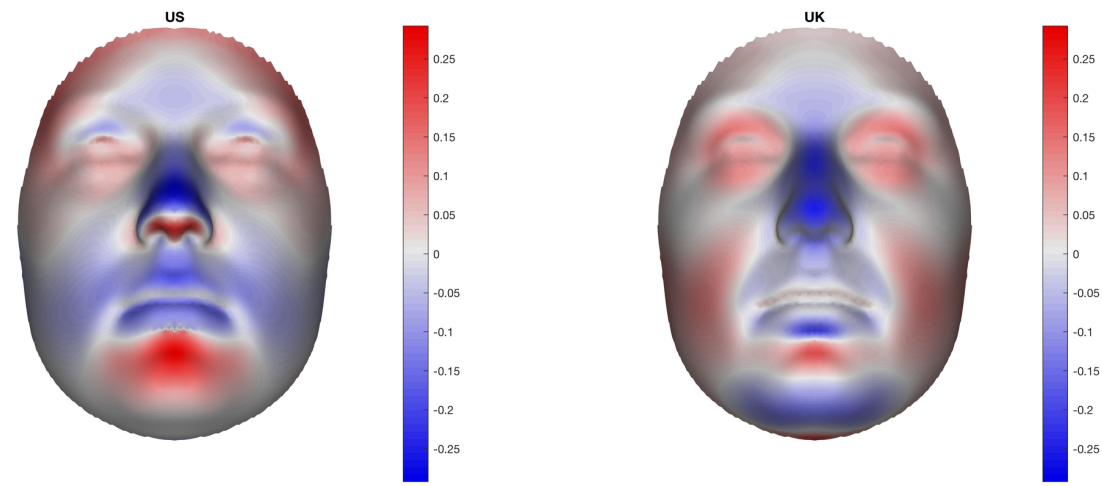

B

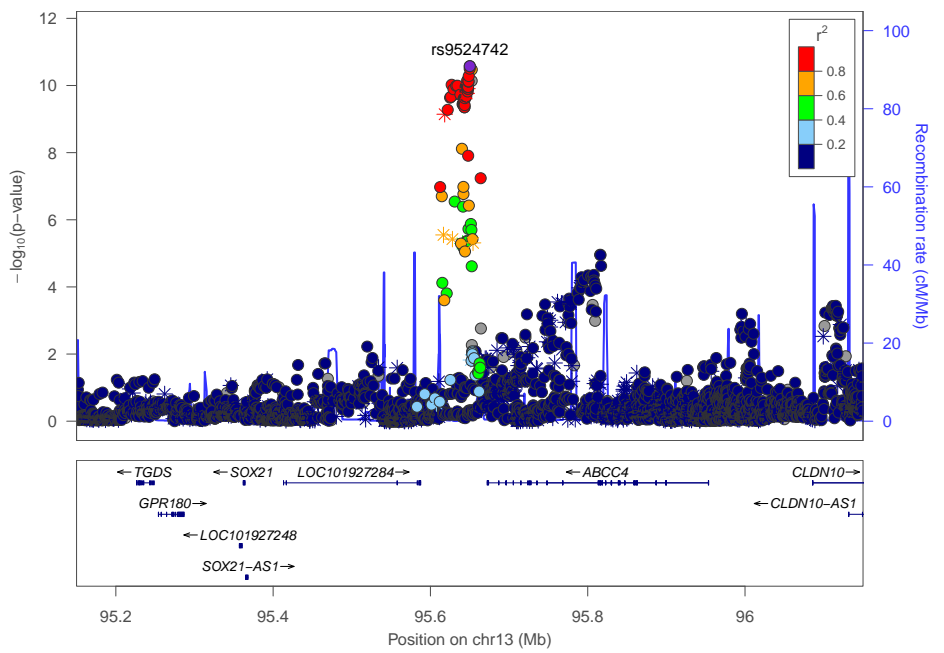

C

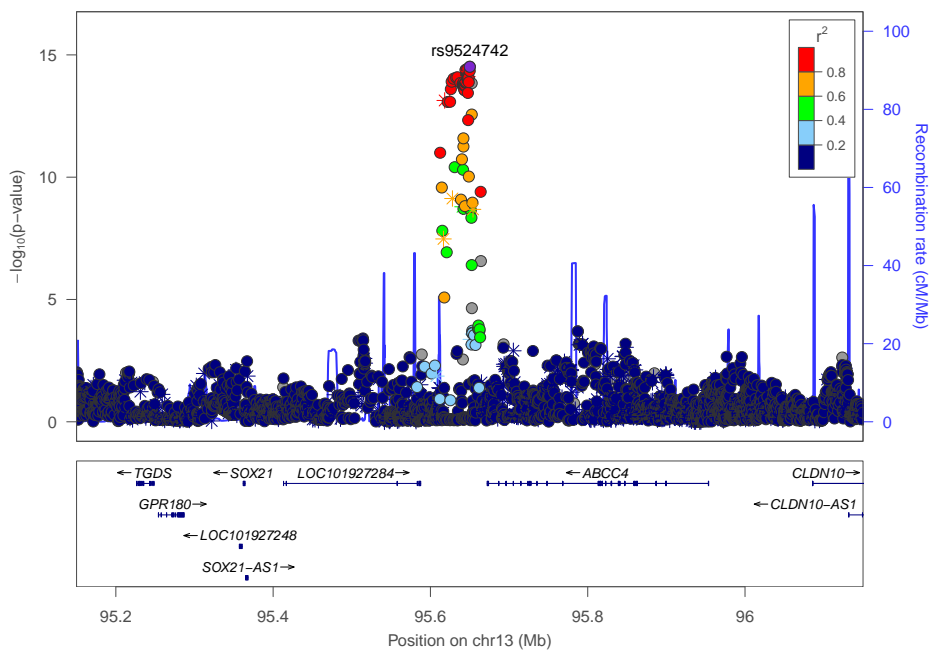



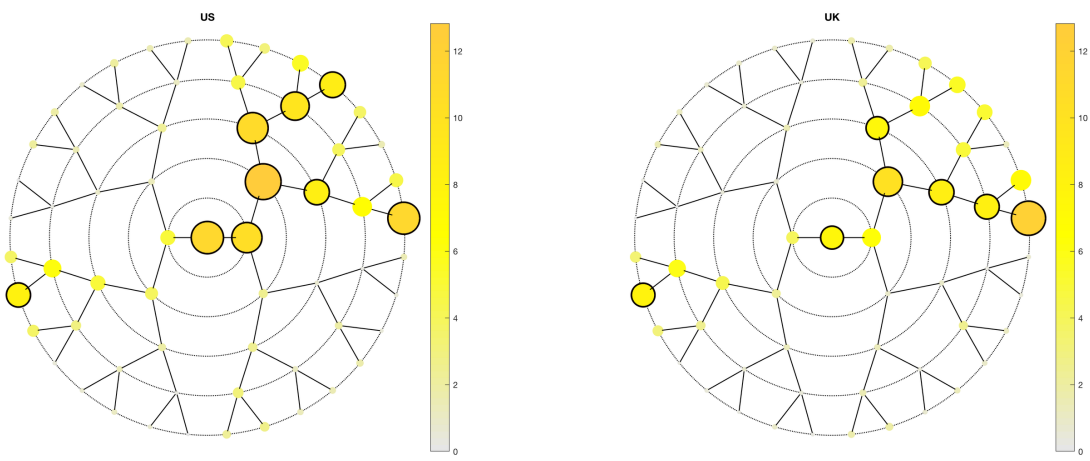

A

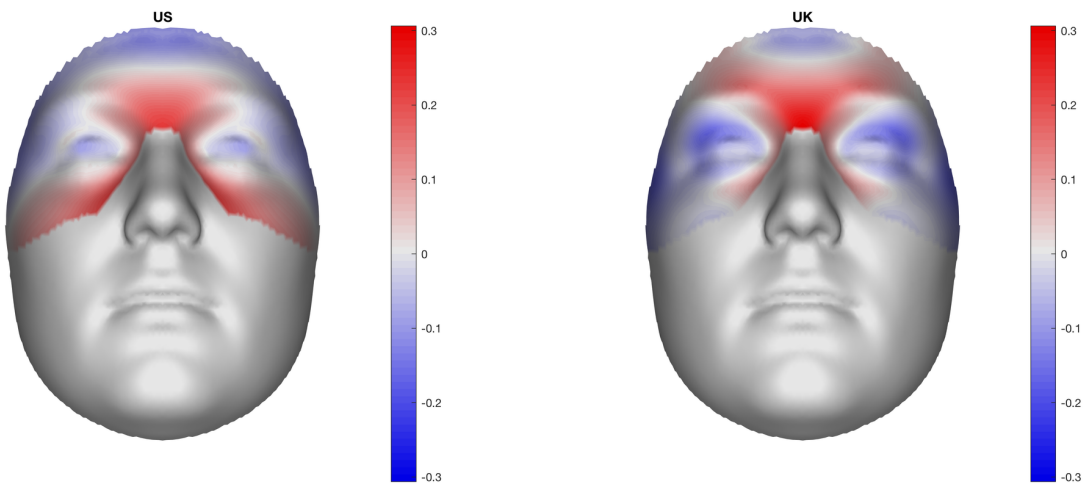

B

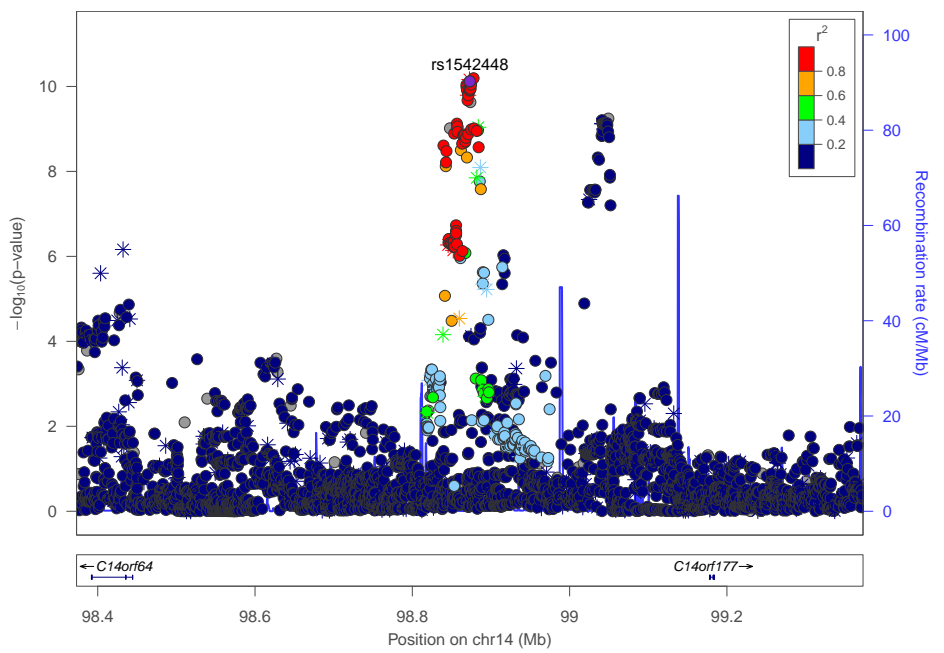

C

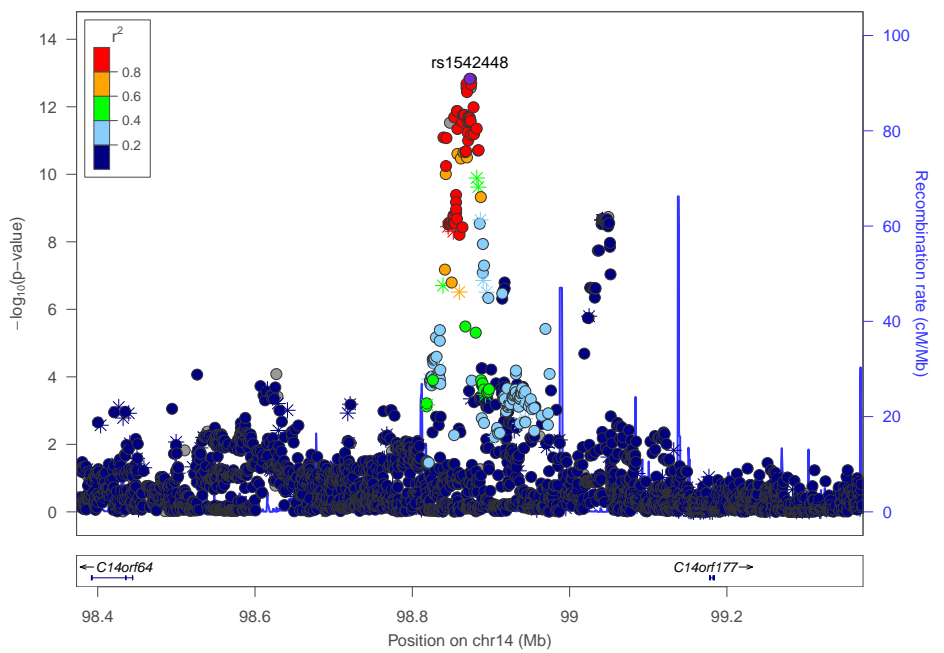



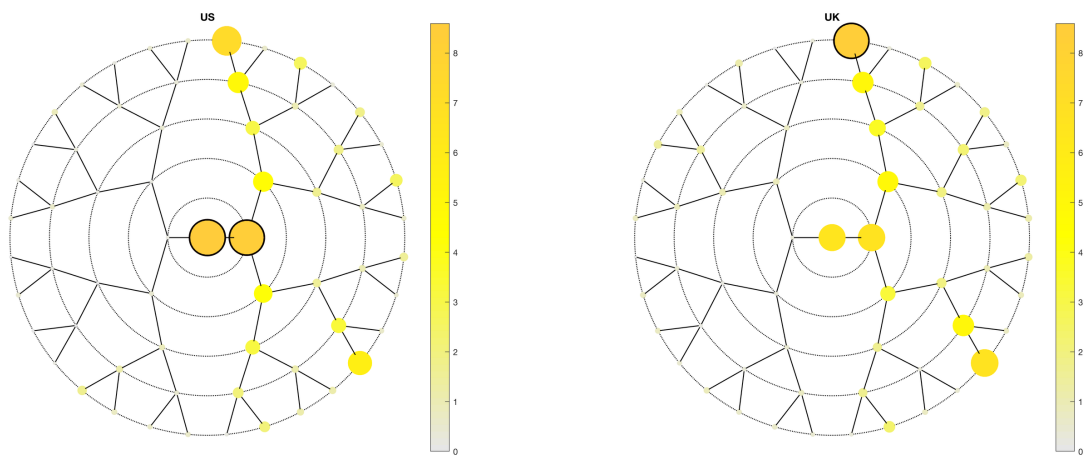

A

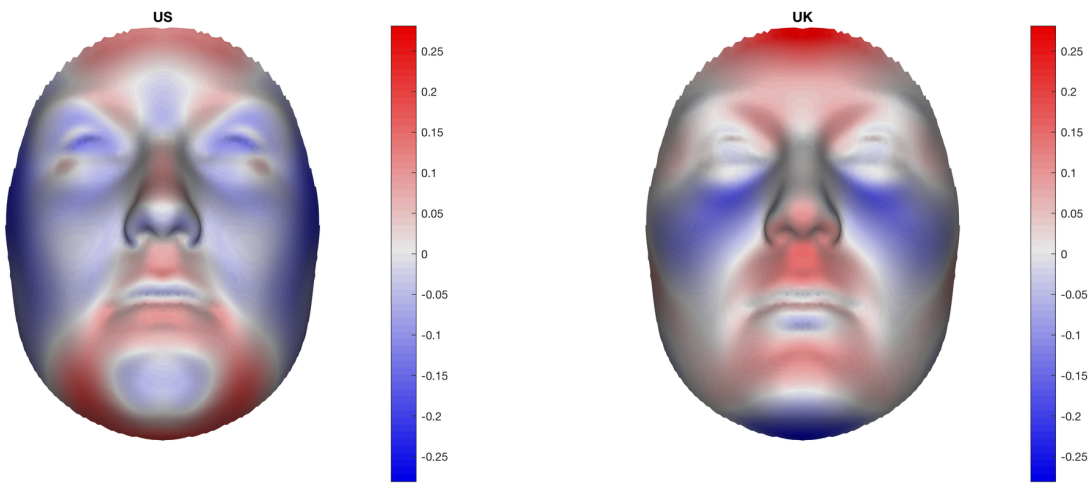

B

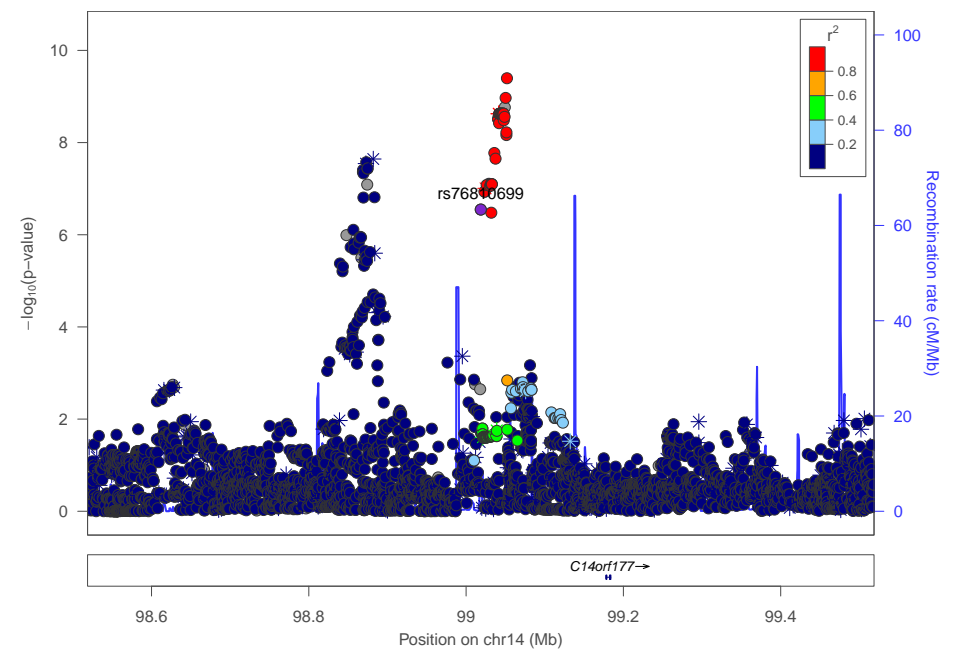

C

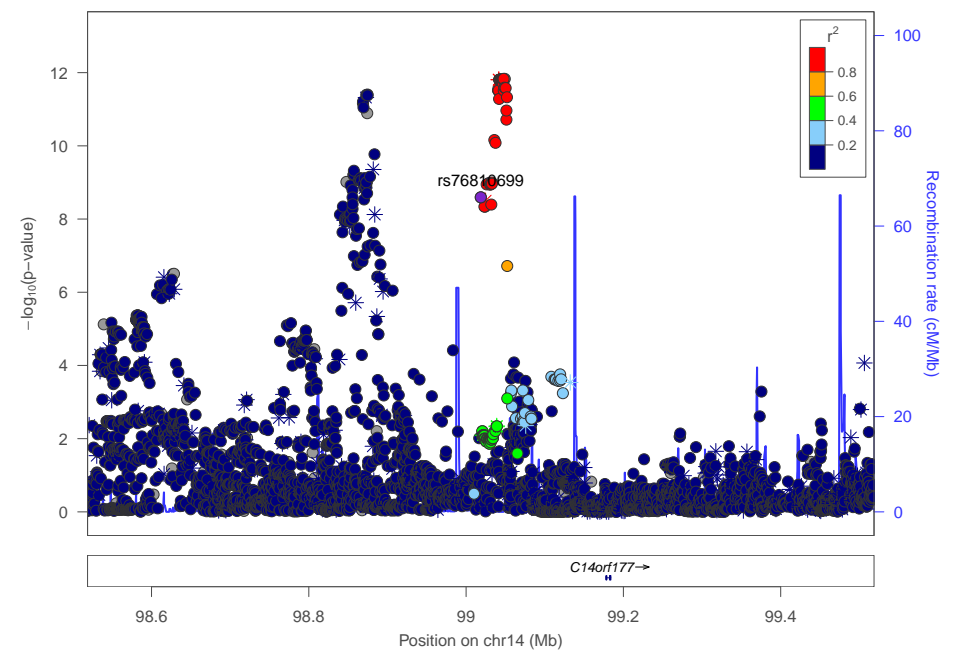

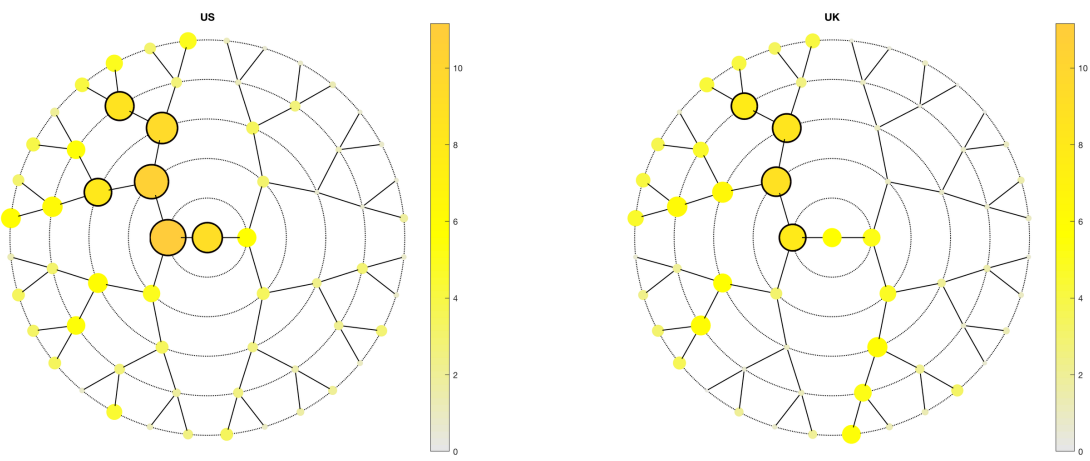

A

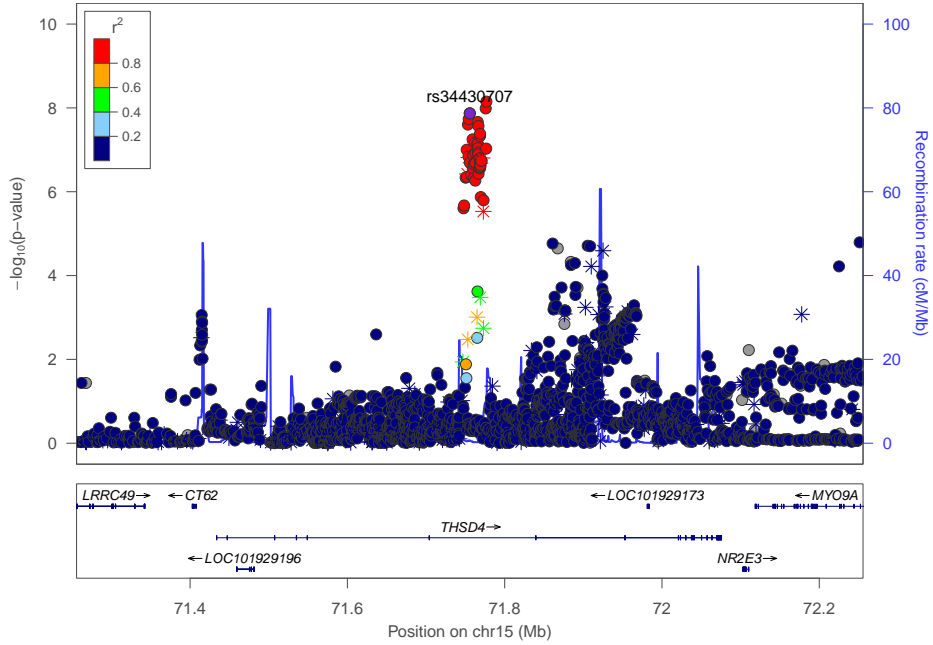

C

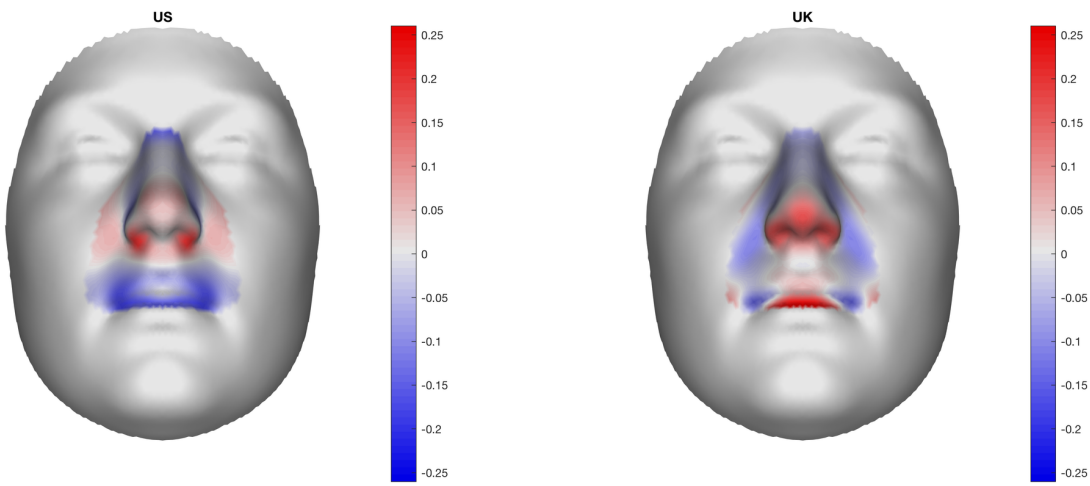

B

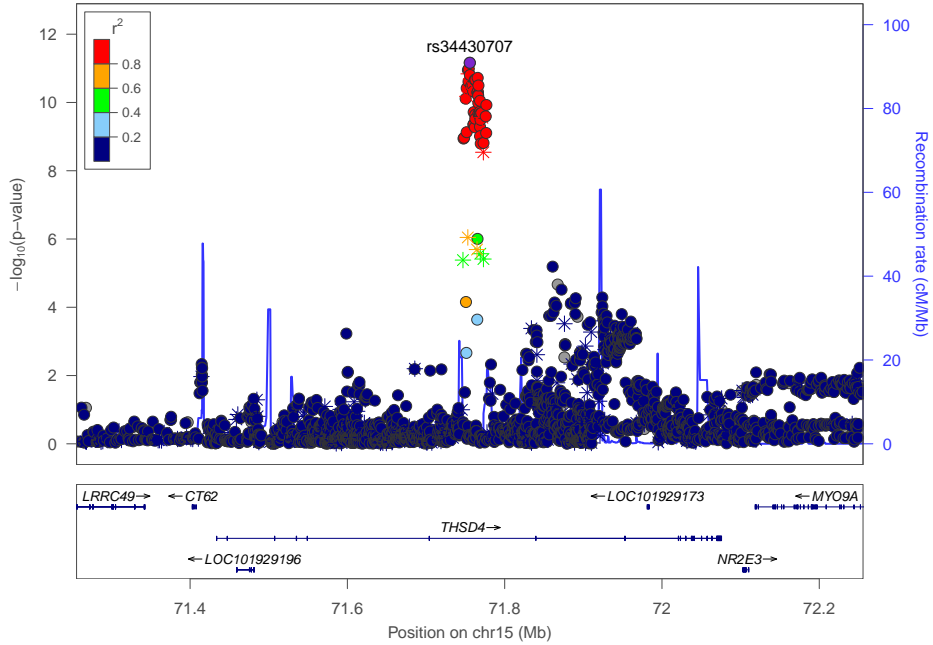

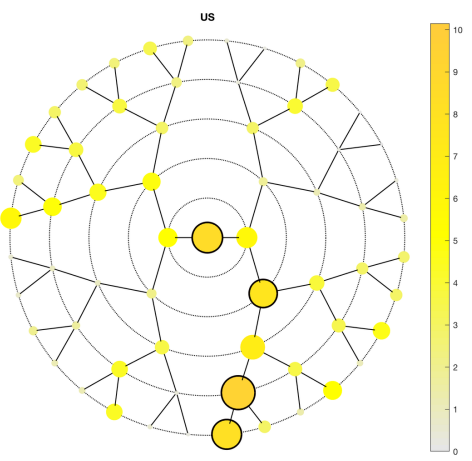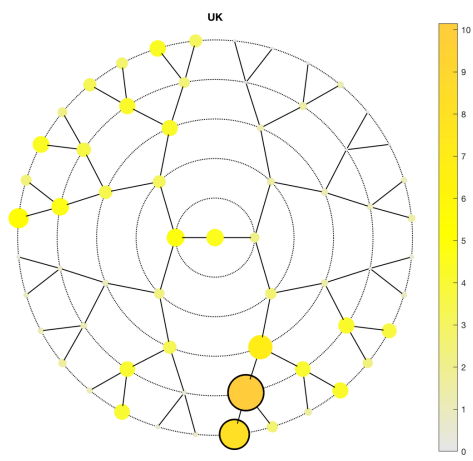

A

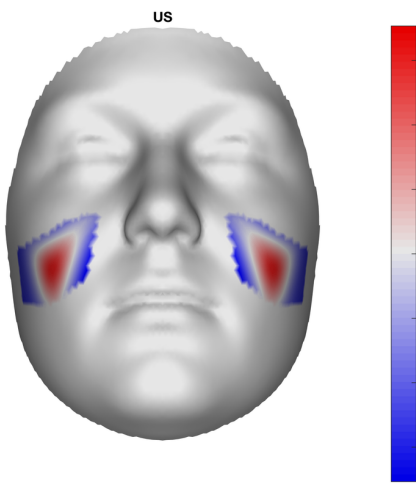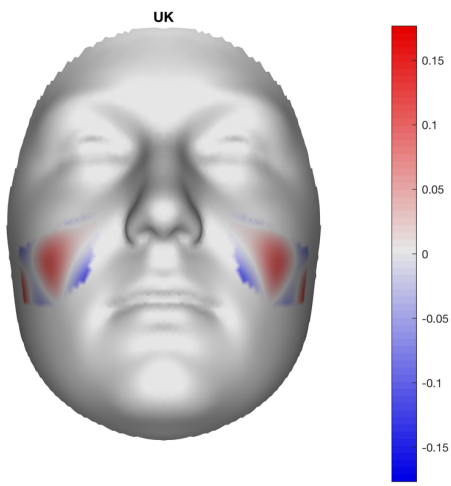

B

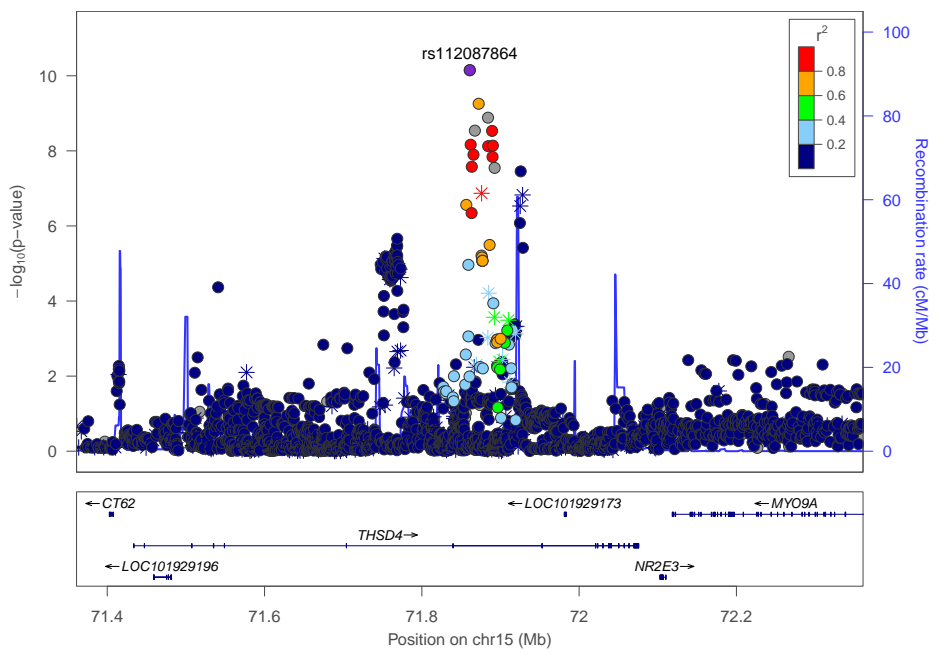

C

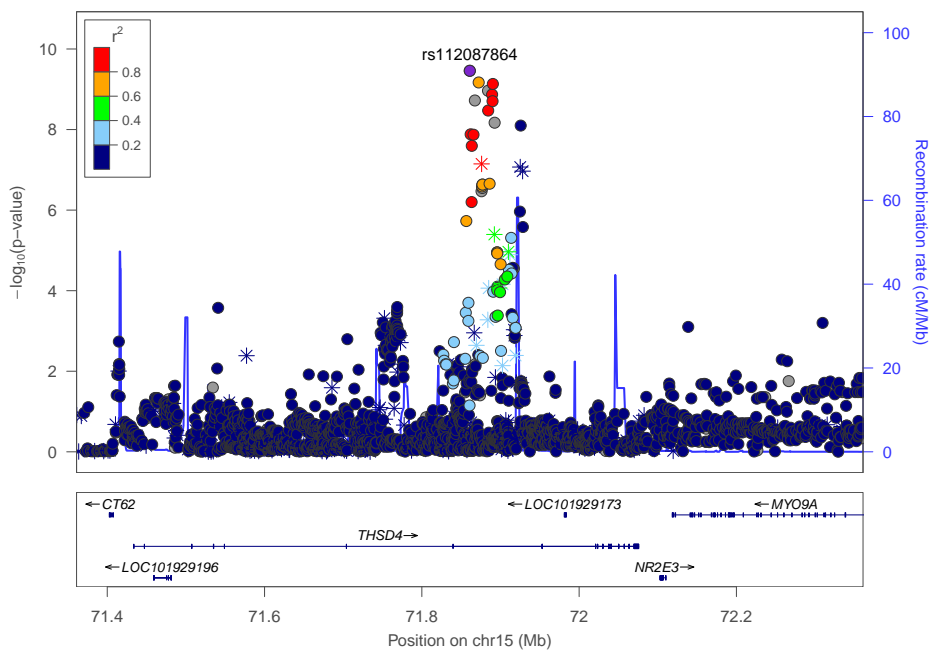

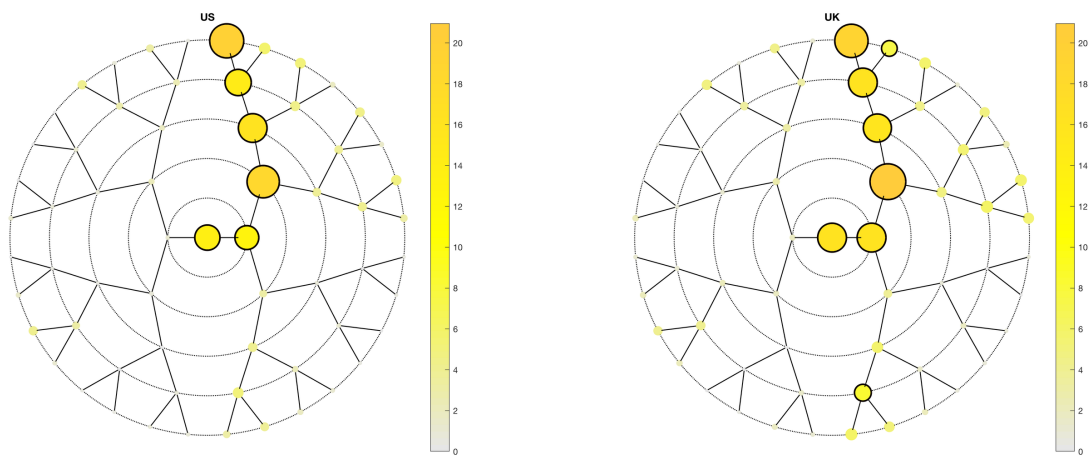

A

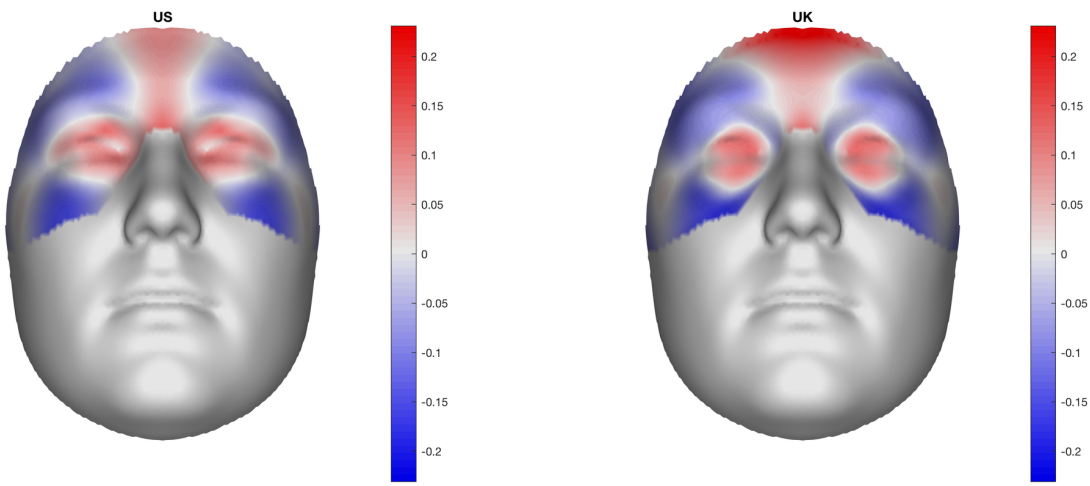

B

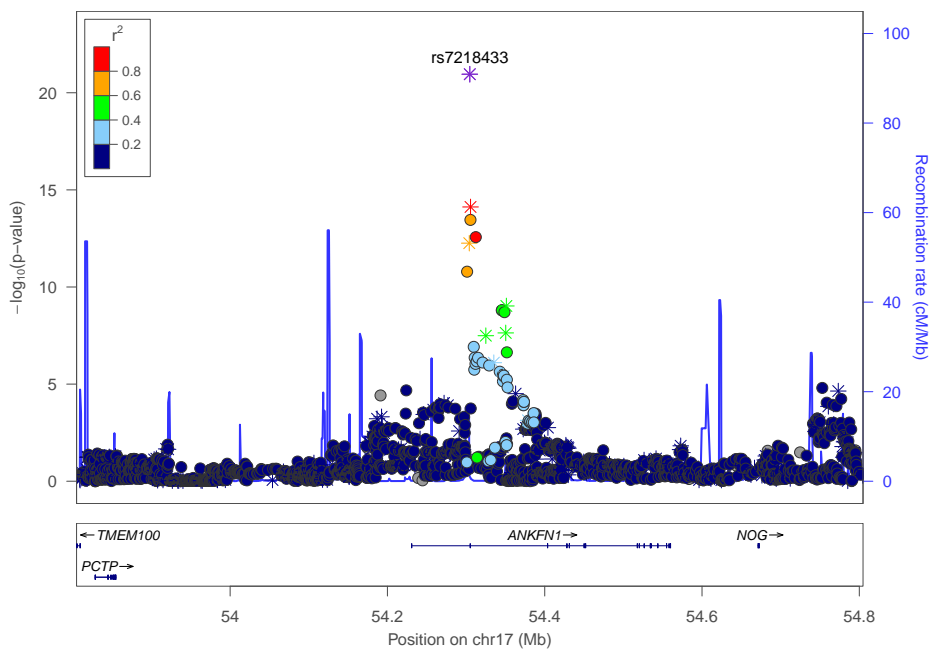

C

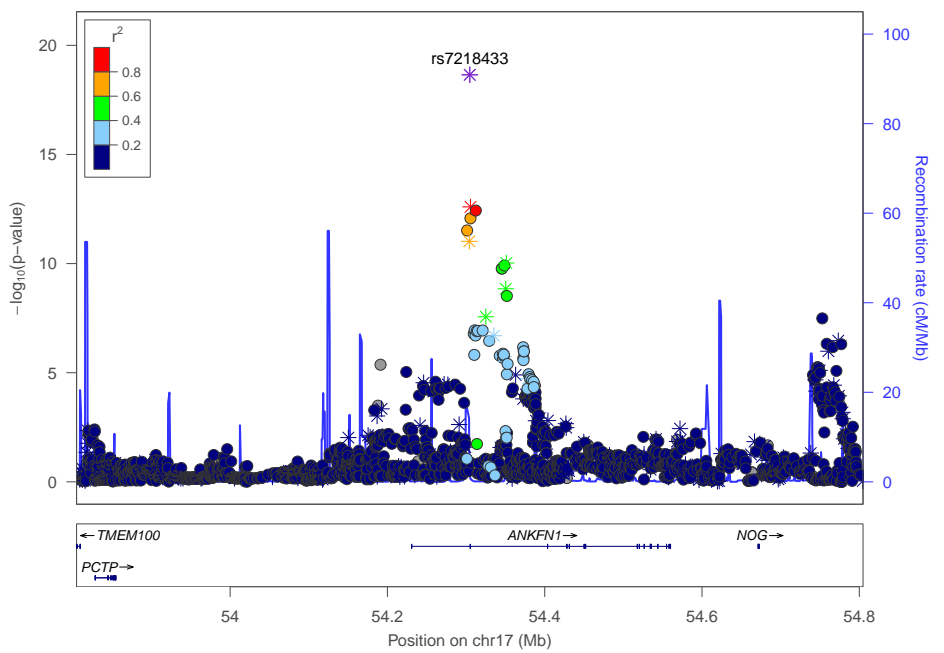

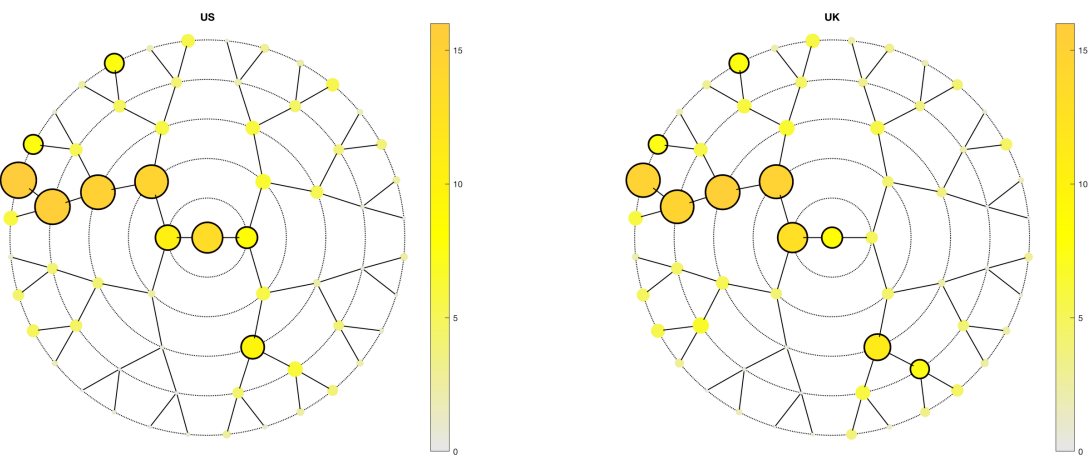

A

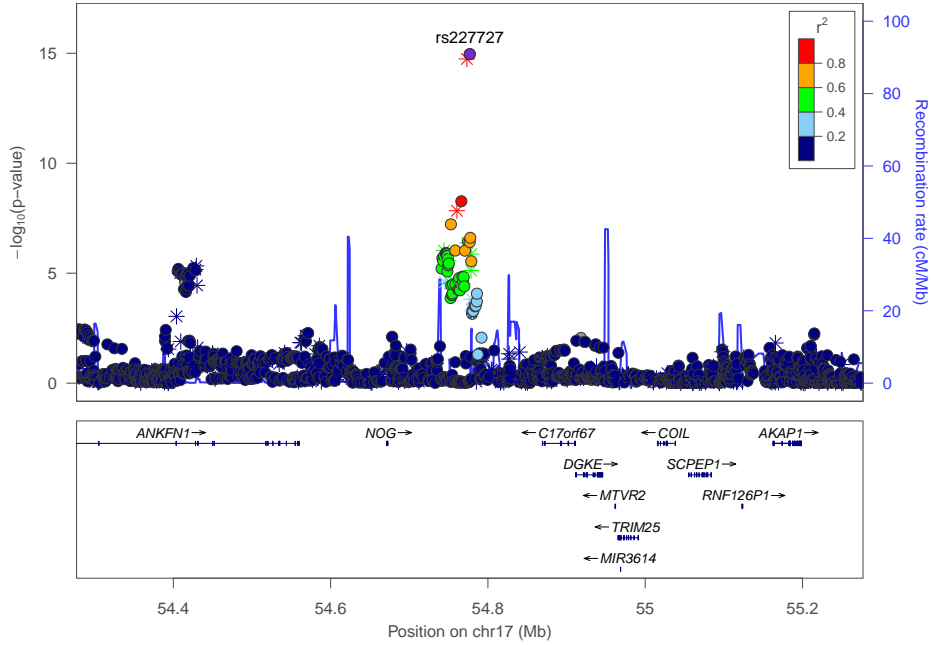

C

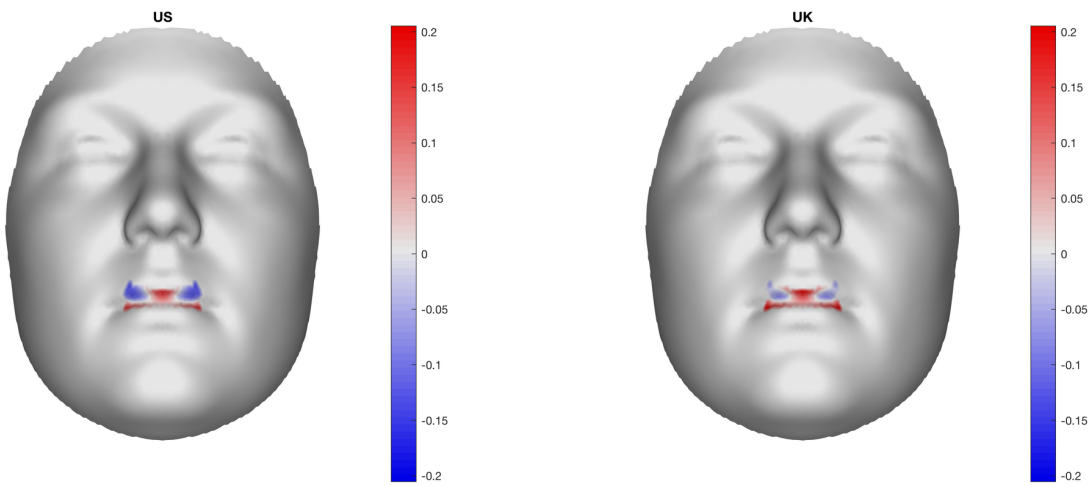

B

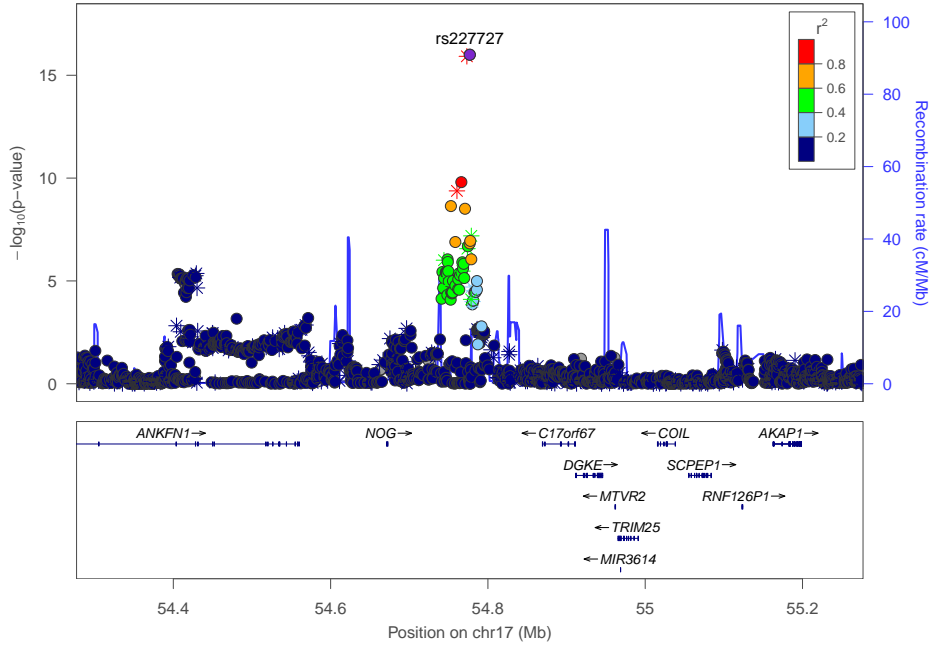



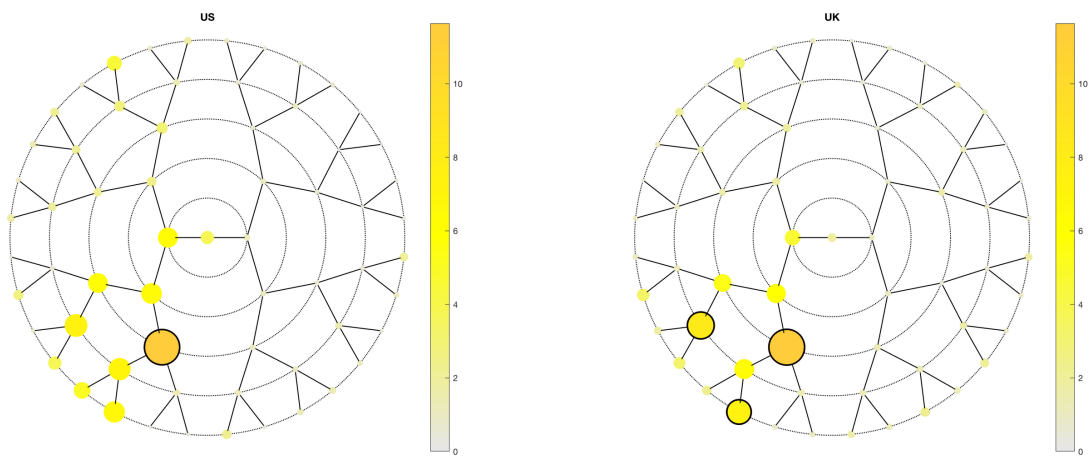

A

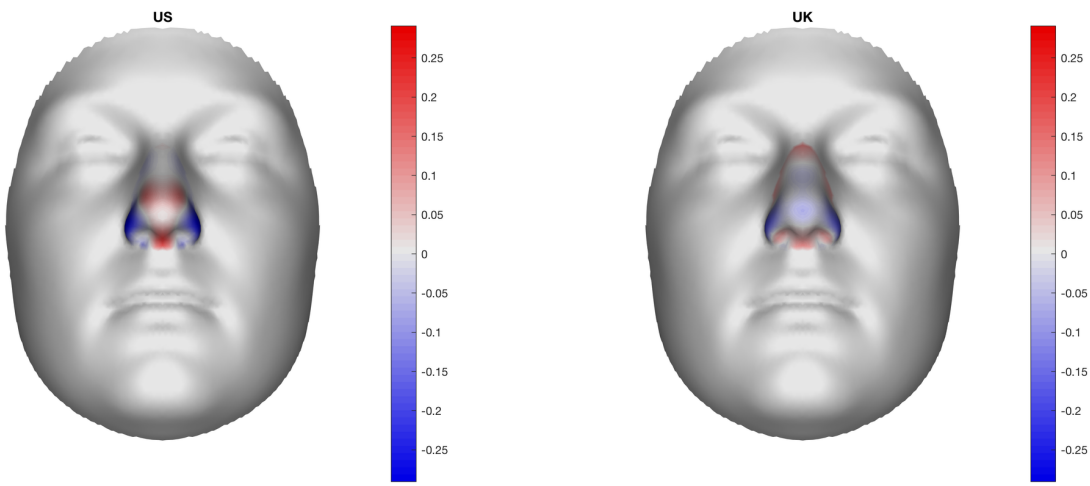

B

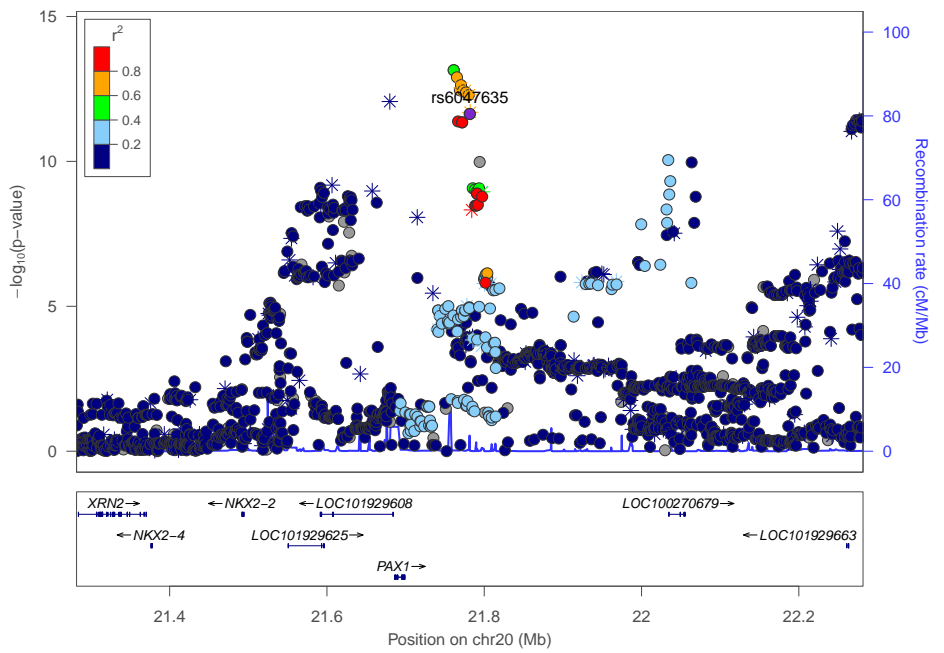

C

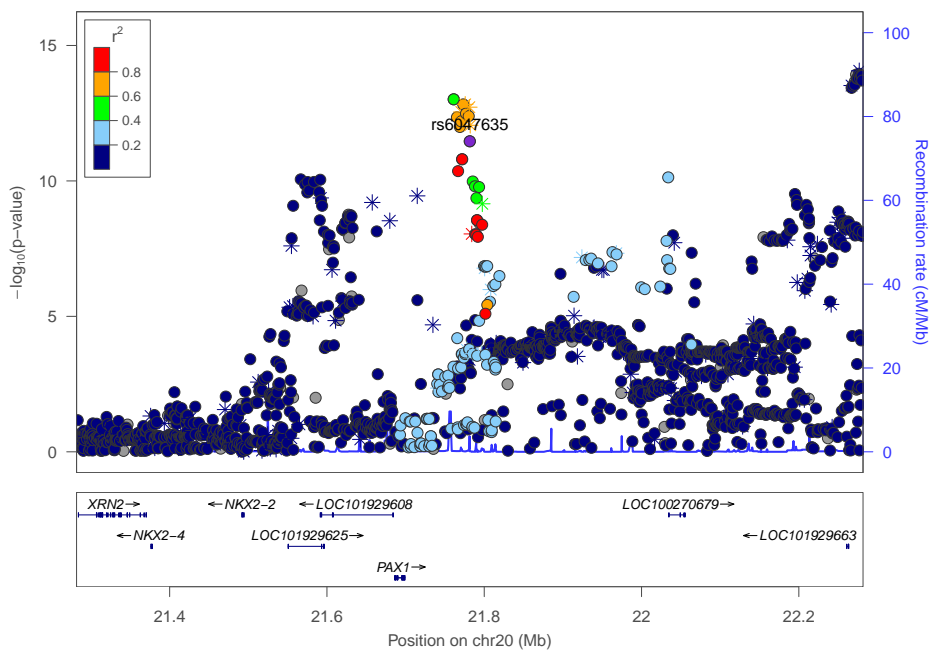

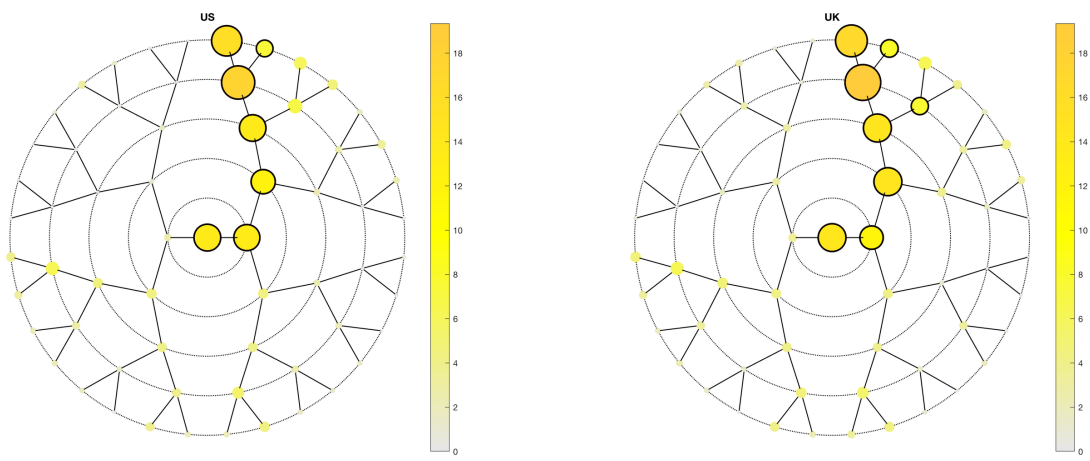

A

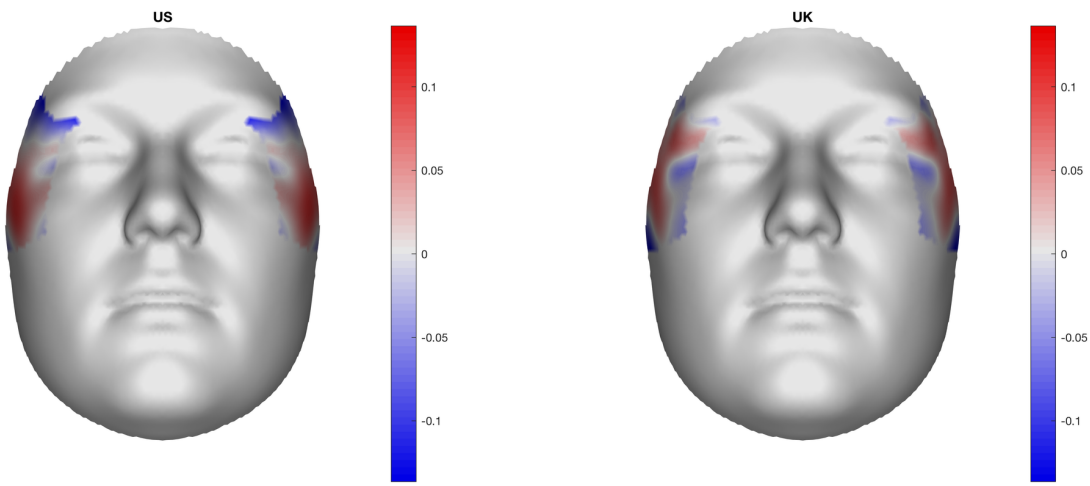

B

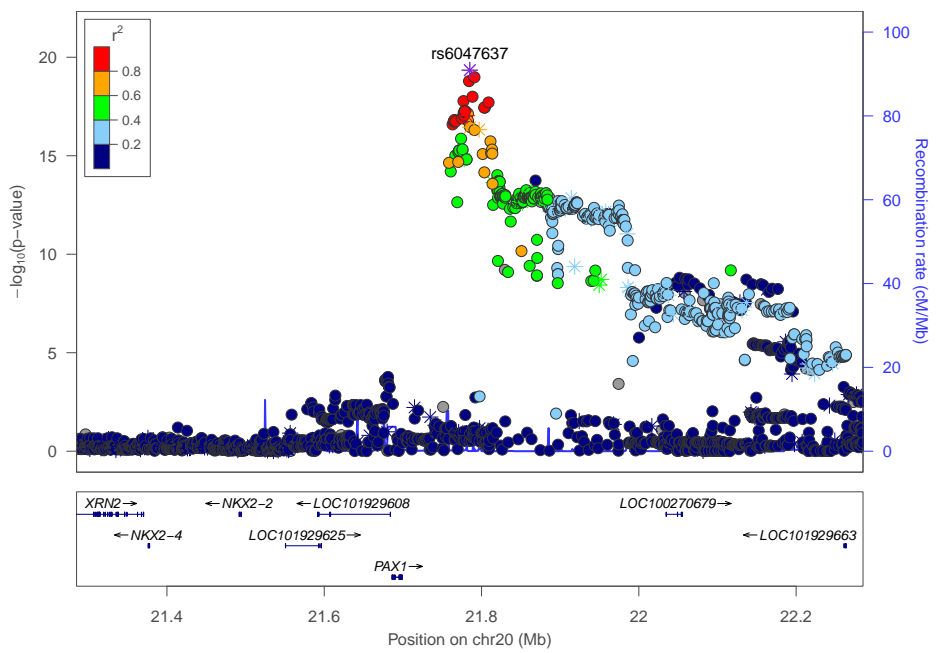

C

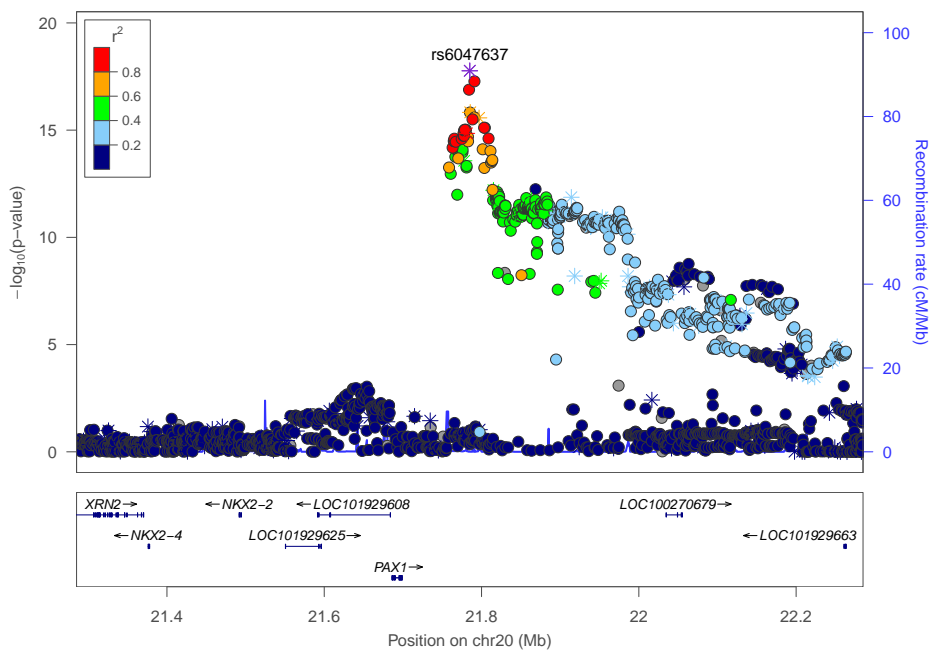

**Overview figures of 24 multi-peak loci.** For each of the twenty-four multi-peak loci (listed in Supplementary Table 5): (A)  $-\log_{10}(\text{p-value})$  of the meta-analysis one-sided, right-tailed p-value per facial segment in  $\text{META}_{\text{US}}$  and  $\text{META}_{\text{UK}}$  tracks. Black-encircled facial segments have reached genome-wide significance ( $P = 5 \times 10^{-8}$ ). (B) The normal displacement (displacement in the direction locally normal to the facial surface) in each quasi landmark of the facial segment reaching the lowest p-value in  $\text{META}_{\text{US}}$  and  $\text{META}_{\text{UK}}$ , going from the minor to the major allele. Blue indicates inward depression; red indicates outward protrusion. (C) LocusZoom plots in  $\text{META}_{\text{US}}$  (top) and  $\text{META}_{\text{UK}}$  (bottom), for the segment in which the SNP had its lowest p-value (one-sided). Points are colored based on linkage disequilibrium ( $r^2$ ) in the 1000 Genomes Phase 3 EUR population. Asterisks represent genotyped SNPs and circles represent imputed SNPs.
